# Supplementary material for: Computational study on palladium-catalyzed alkenylation of remote δ-C(sp3)–H bonds with alkynes: a new understanding of mechanistic insight and origins of site-selectivity
Source: Royal Society of Chemistry journal article supplement (doi:10.1039/c8ra06077k), 2018-01-01
Supplement: c8ra06077k1.pdf [file c8ra06077k1.pdf]

## Supporting Information

# **Computational Study on Palladium-Catalyzed Alkenylation of Remote $\delta$ -C(sp<sup>3</sup>)-H Bond with Alkynes: A New Understanding of Mechanistic Insight and Origins of Site-Selectivity**

Hui-Min Yan,<sup>a</sup> Niu Li,<sup>a</sup> Ye, Tian,<sup>a</sup> Rong Chang,<sup>a</sup> Zhu-Xia Zhang,<sup>a</sup> Xiao-Yun Zhang,<sup>a</sup> Wen-Jing Yang,<sup>a</sup> Zhen Guo\*<sup>a</sup> and Yan-Rong Li\*<sup>b</sup>

<sup>a</sup>*College of Material Science & Engineering, Key Laboratory of Interface Science and Engineering in Advanced Materials, Ministry of Education, Taiyuan University of Technology, Shanxi 030024 P. R. China.*

<sup>b</sup>*Department of Earth Science and Engineering, Taiyuan University of Technology, Shanxi 030024, P. R. China.*

*Email: guozhen@tyut.edu.cn; li.dennis@hotmail.com*

## Table of Contents

|                                                                                                                                                                                                                                                                                    |    |
|------------------------------------------------------------------------------------------------------------------------------------------------------------------------------------------------------------------------------------------------------------------------------------|----|
| 1. Computed simplified reaction energy profile of Pd <sub>2</sub> (OAc) <sub>4</sub> -catalyzed alkenylation of δ-C(sp <sup>3</sup> )-H bond with alkynes with the geometry optimization being performed at the B3LYP/BS1 level in solvents employing the SMD solvation model..... | 3  |
| 2. Complete free energy profiles for the dimeric Pd <sub>2</sub> (OAc) <sub>4</sub> catalyzed C(sp <sup>3</sup> )-H bond alkenylation of aliphatic amines.....                                                                                                                     | 4  |
| 3. Alternative dimeric Pd <sub>2</sub> (OAc) <sub>4</sub> catalyzed δ-C(sp <sup>3</sup> )-H bond activation model .....                                                                                                                                                            | 6  |
| 4. Origin of regioselectivity.....                                                                                                                                                                                                                                                 | 7  |
| 5. Monomer Pd(OAc) <sub>2</sub> catalyzed C(sp <sup>3</sup> )-H bond alkenylation of aliphatic amines.....                                                                                                                                                                         | 8  |
| 6. Heterodimer Ni-Pd(OAc) <sub>4</sub> catalyzed δ-C(sp <sup>3</sup> )-H bond activation and PhC≡CPh migratory insertion into the C-Pd bond.....                                                                                                                                   | 9  |
| 7. Cartesian coordinates of all structures.....                                                                                                                                                                                                                                    | 10 |
| 8. Cartesian coordinates of structures in Figure S1.....                                                                                                                                                                                                                           | 61 |

**1. Computed reaction energy profile of Pd<sub>2</sub>(OAc)<sub>4</sub>-catalyzed alkenylation of  $\delta$ -C(sp<sup>3</sup>)-H bond with alkynes with the geometry optimization being performed at the B3LYP/BS1 level in solvents employing the SMD solvation model**

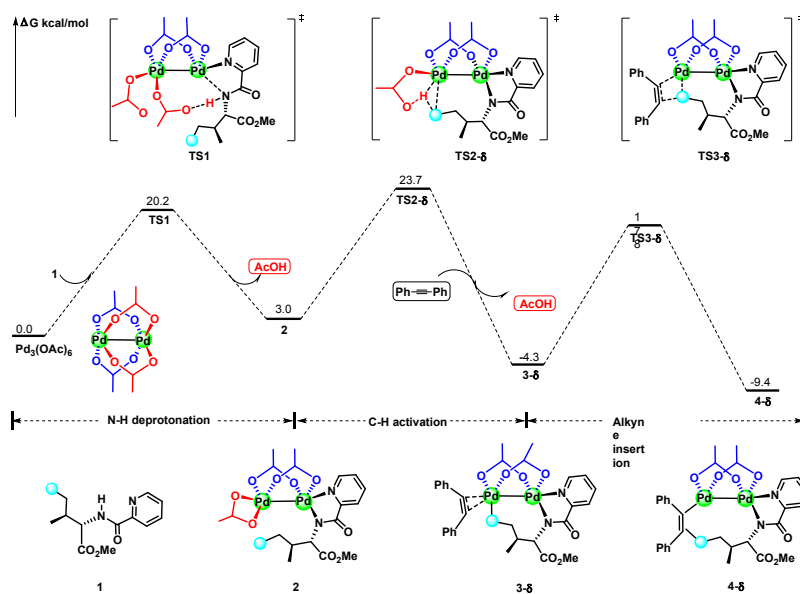

Figure S1 Computed reaction energy profile of Pd<sub>2</sub>(OAc)<sub>4</sub>-catalyzed alkenylation of  $\delta$ -C(sp<sup>3</sup>)-H bond with alkynes were performed at SMD(TCE)-M06/SDD/6-311++G(d,p)//SMD(TCE)-B3LYP/LANL2DZ/6-31G(d,p).

## 2. Complete free energy profiles for the dimeric Pd<sub>2</sub>(OAc)<sub>4</sub> catalyzed C(sp<sup>3</sup>)-H bond alkenylation of aliphatic amines

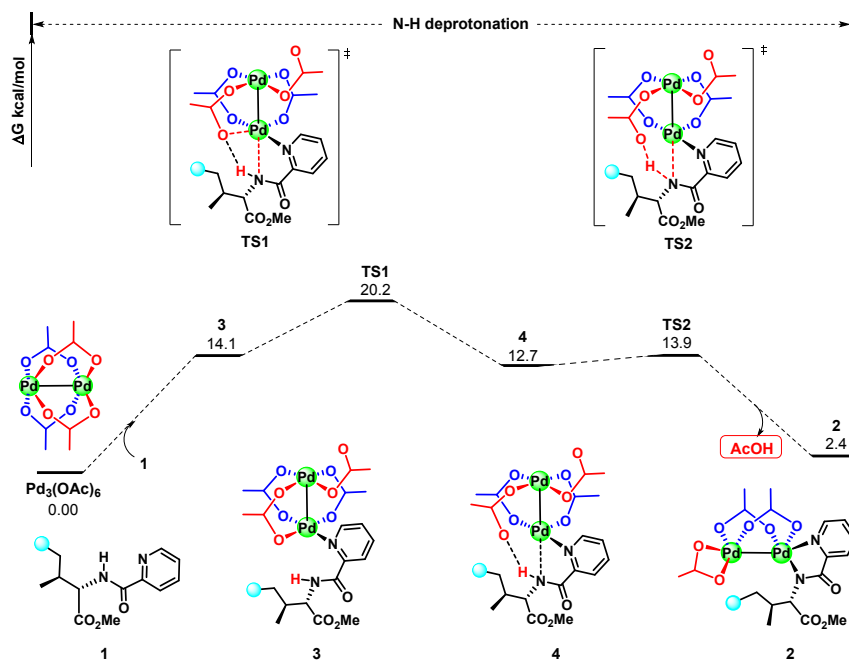

**Fig. S2** Reaction energy profile of the N-H bond activation catalyzed by dimeric Pd<sub>2</sub>(OAc)<sub>4</sub>. All energies are relative to the Pd<sub>3</sub>(OAc)<sub>6</sub> + 1 and are mass balanced (similarly hereinafter).

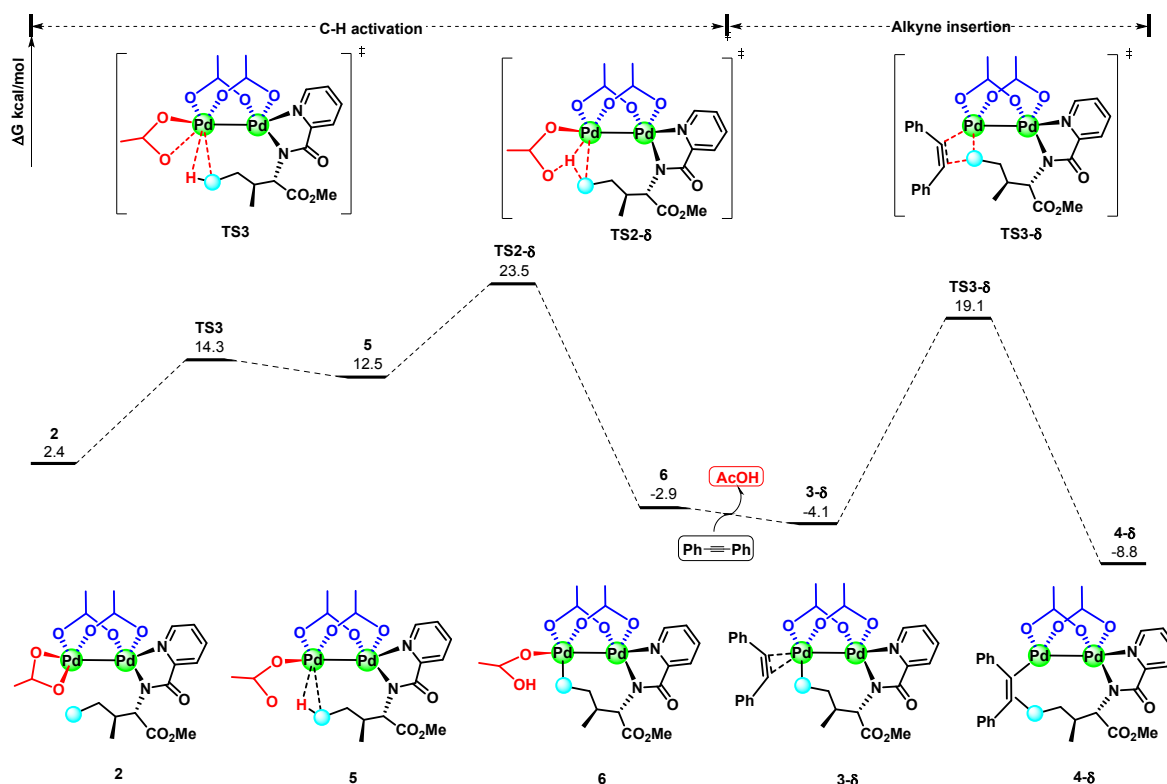

**Fig. S3** Reaction energy profile of the dimeric Pd<sub>2</sub>(OAc)<sub>4</sub> catalyzed  $\delta$ -C(sp<sup>3</sup>)-H bond activation and PhC≡Ph migratory insertion into the C-Pd bond.

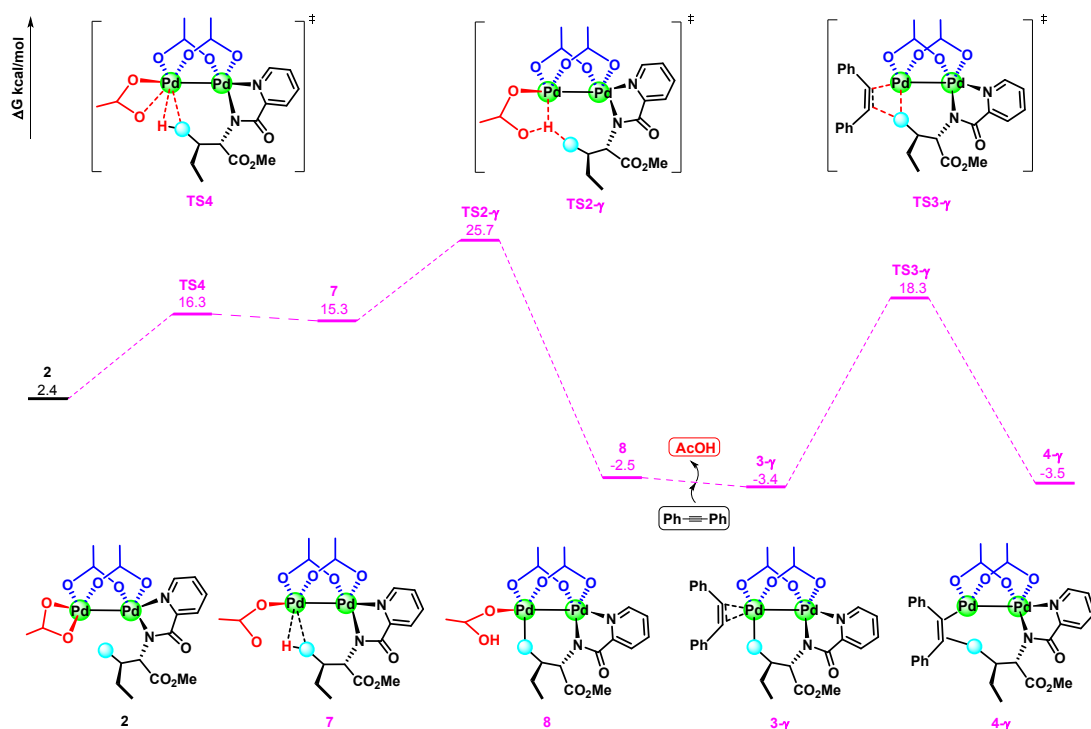

**Fig. S4** Reaction energy profile of the dimeric Pd<sub>2</sub>(OAc)<sub>4</sub> catalyzed  $\gamma$ -C(sp<sup>3</sup>)-H bond activation and PhC≡CPh migratory insertion into the C-Pd bond.

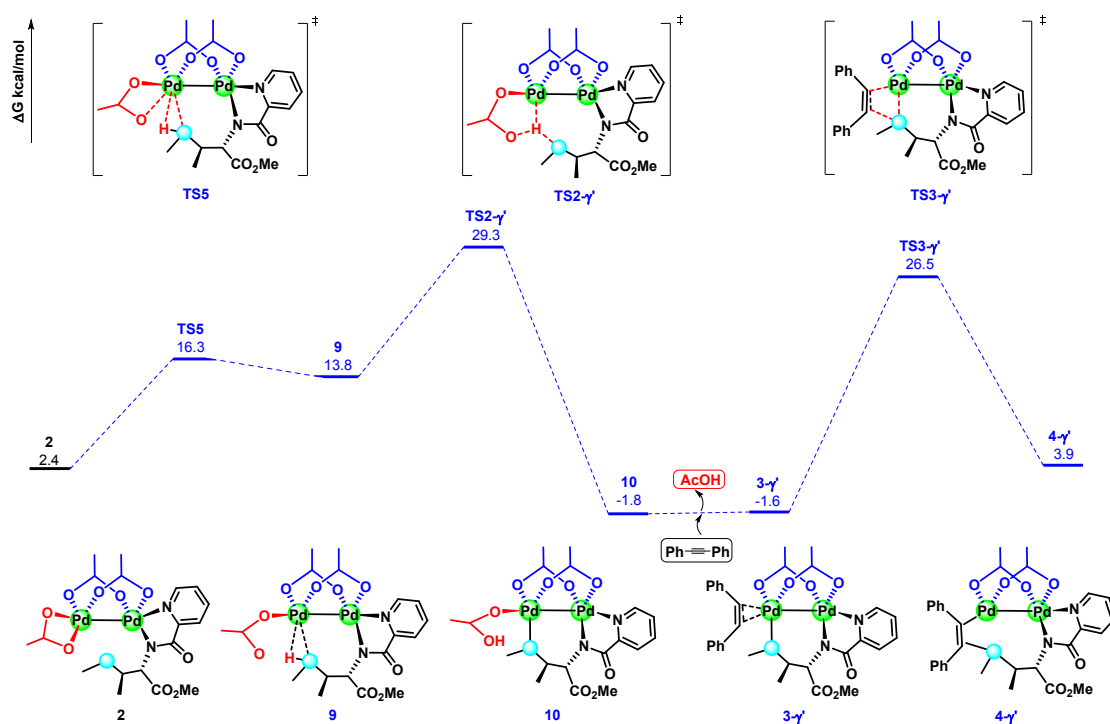

**Fig. S5** Reaction energy profile of the dimeric Pd<sub>2</sub>(OAc)<sub>4</sub> catalyzed  $\gamma'$ -C(sp<sup>3</sup>)-H bond activation and PhC≡CPh migratory insertion into the C-Pd bond.

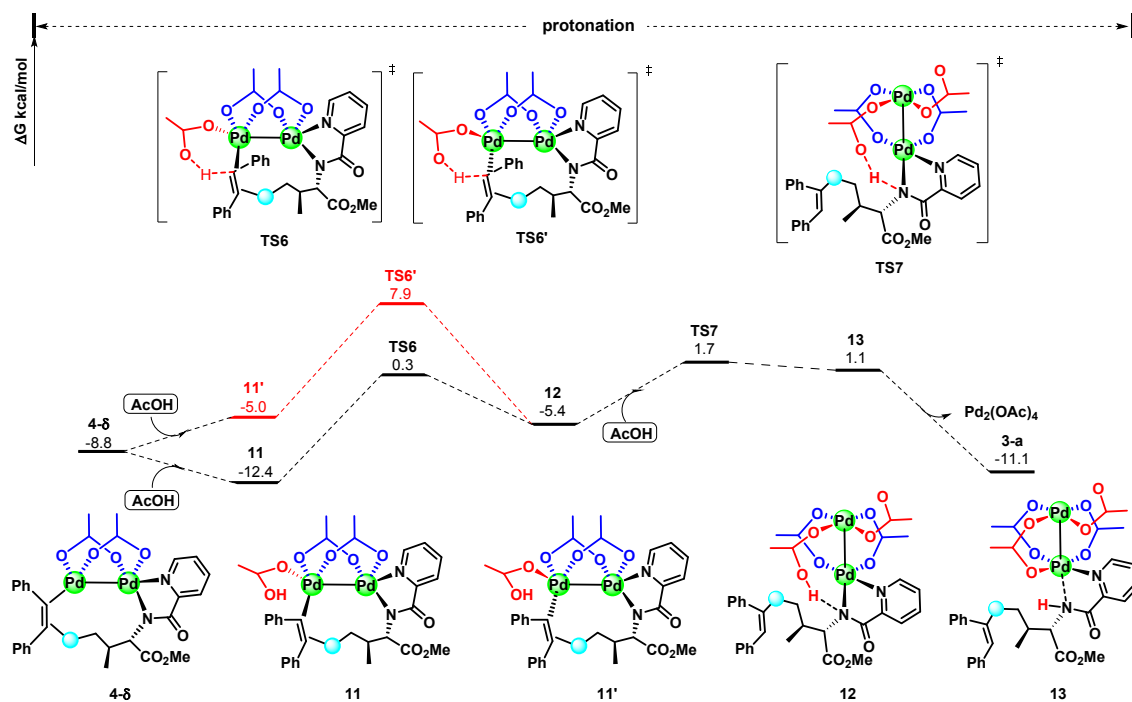

Fig. S6 Reaction energy profile of two protonation steps.

### 3. Alternative dimeric Pd<sub>2</sub>(OAc)<sub>4</sub> catalyzed $\delta$ -C(sp<sup>3</sup>)-H bond activation model

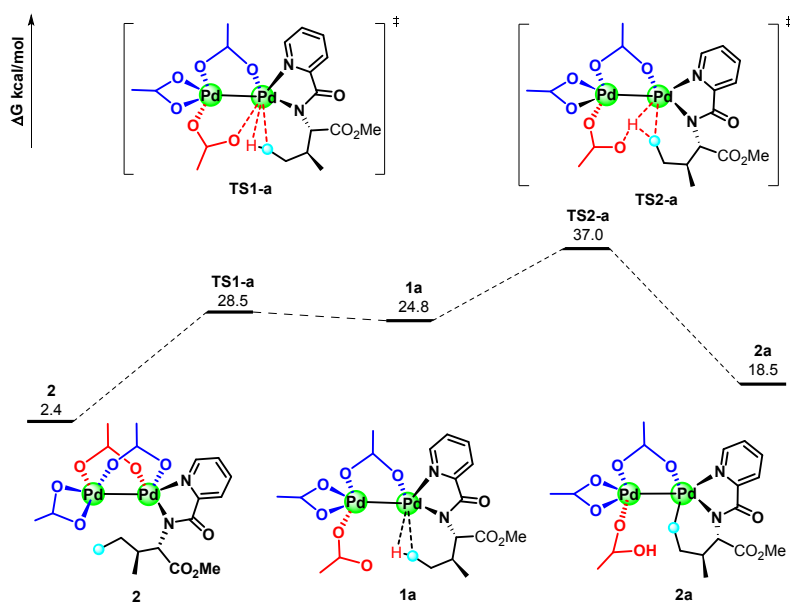

Fig. S7 Free energy profiles for alternative dimeric Pd<sub>2</sub>(OAc)<sub>4</sub> catalyzed  $\delta$ -C(sp<sup>3</sup>)-H bond activation.

#### 4. Origin of regioselectivity.

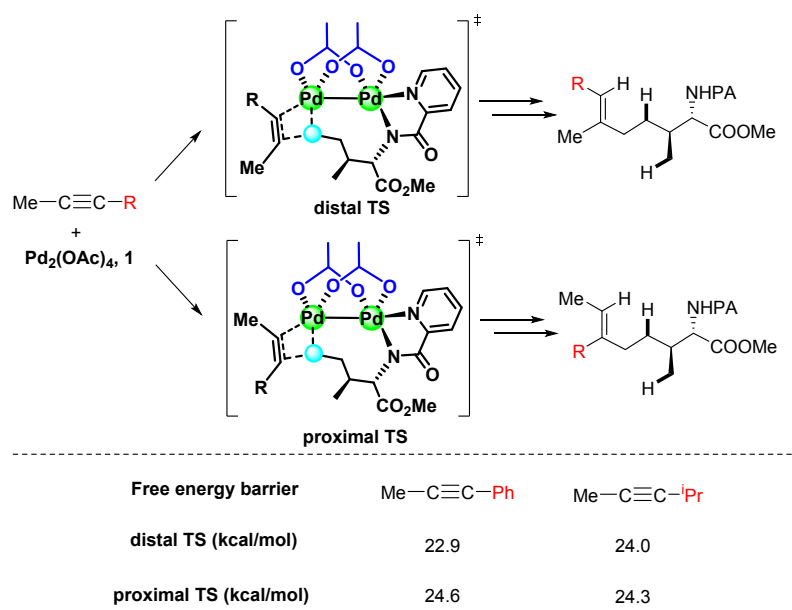

**Fig. S8** Relative free energies of Pd<sub>2</sub>(OAc)<sub>4</sub> catalyzed asymmetric alkynes insertion.

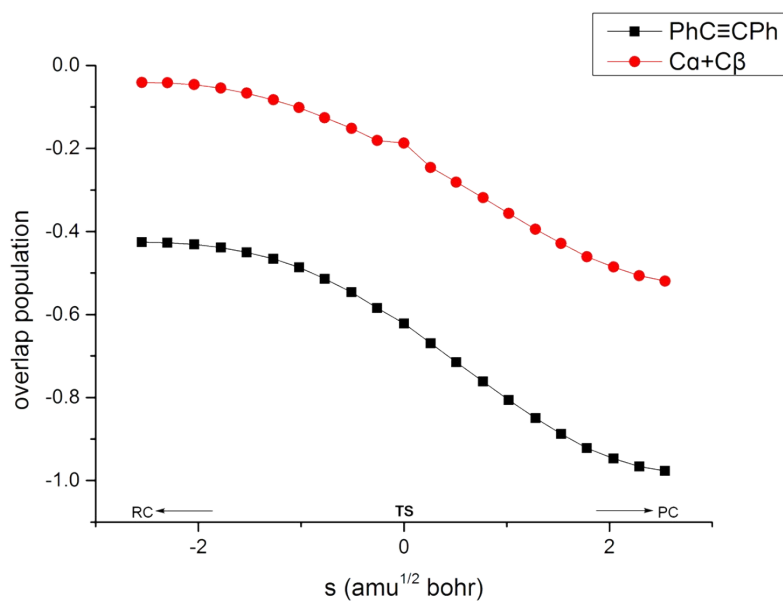

**Fig. S9** Change in Mulliken charge along the IRC of PhC≡CPh

## 5. Monomer Pd(OAc)<sub>2</sub> catalyzed C(sp<sup>3</sup>)-H bond alkenylation of aliphatic amines

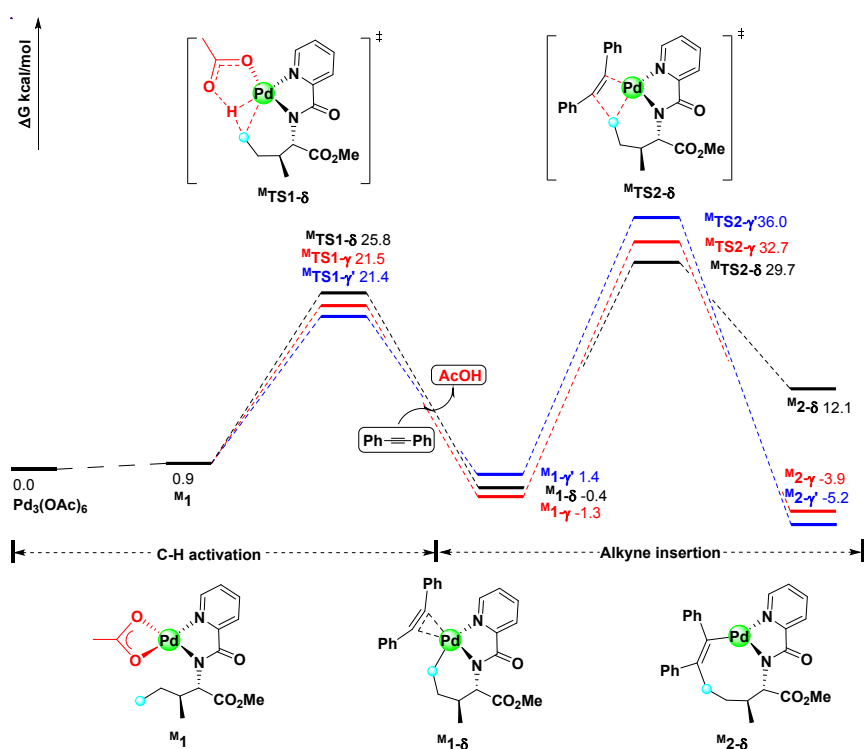

Fig. S10 Reaction energy profile of monomer Pd(OAc)<sub>2</sub> catalyzed  $\delta$ -C(sp<sup>3</sup>)-H bond alkenylation of aliphatic amines.



## 6. Heterodimer Ni-Pd(OAc)<sub>4</sub> catalyzed $\delta$ -C(sp<sup>3</sup>)-H bond activation and PhC≡CPh migratory insertion into the C-Pd bond

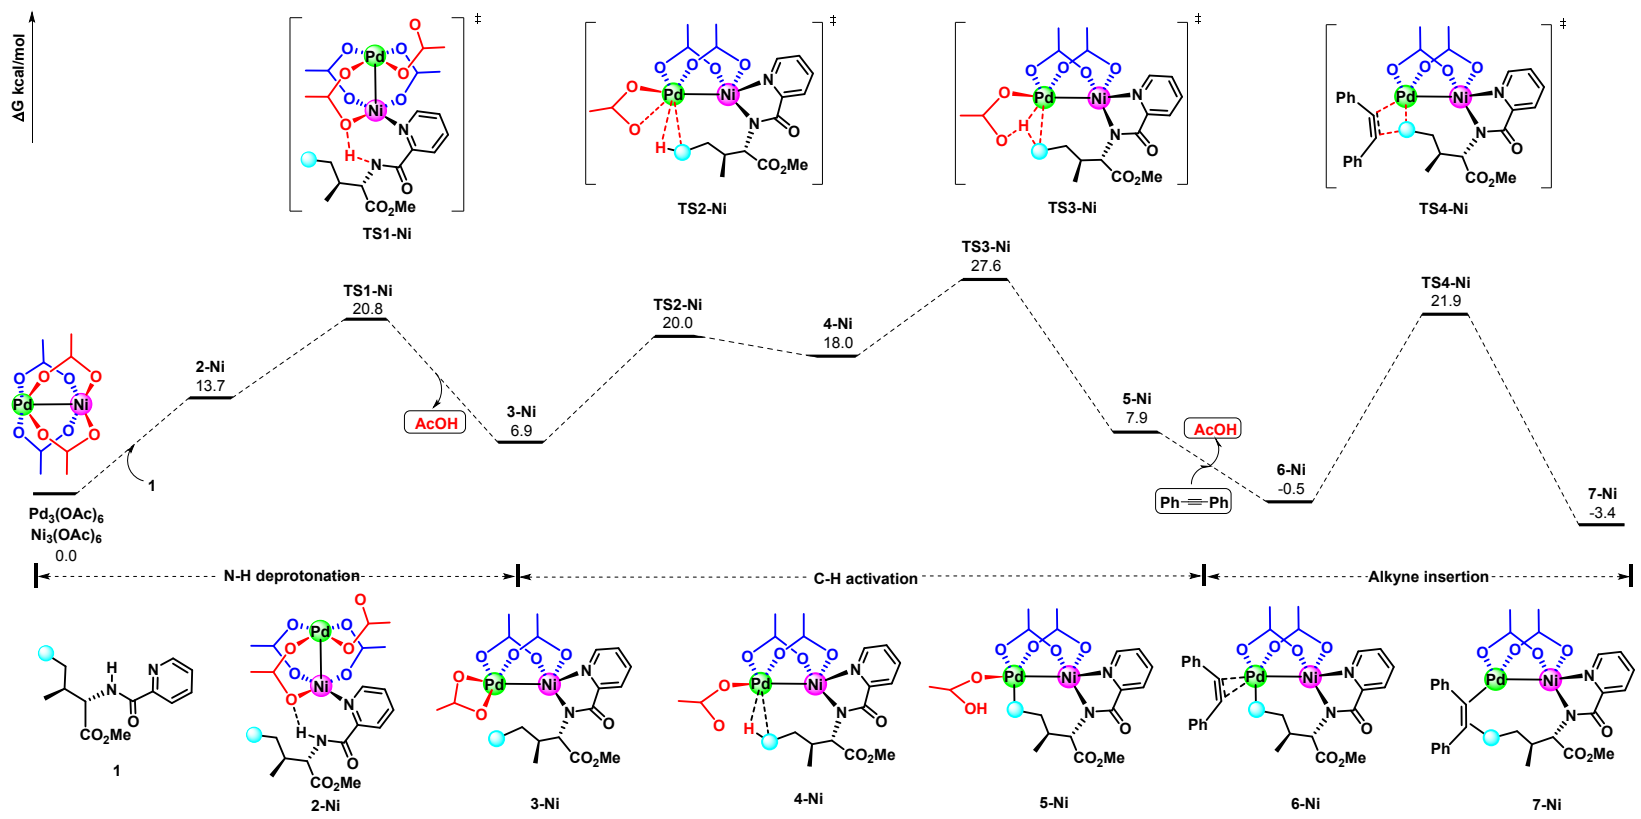

**Fig. S11** Reaction energy profile of the heterodimer Ni-Pd(OAc)<sub>4</sub> catalyzed  $\delta$ -C(sp<sup>3</sup>)-H bond activation and PhC≡CPh migratory insertion into the C-Pd bond. All energies are relative to Pd<sub>3</sub>(OAc)<sub>6</sub> + Ni<sub>3</sub>(OAc)<sub>6</sub> + **1** and are mass balanced.

## 7. Cartesian coordinates of all structures

[Pd(OAc)<sub>2</sub>]<sub>3</sub>

Thermal correction to Gibbs Free Energy= 0.241592 Hartree

SCF Done: E(RM06) = -1754.45109902 Hartree

O 1

|    |             |             |             |
|----|-------------|-------------|-------------|
| Pd | 1.61303700  | 0.92936600  | 0.00099800  |
| C  | 2.24684300  | -1.35660600 | 1.87412900  |
| O  | 2.63339200  | -0.30430700 | 1.28580300  |
| O  | 1.20187400  | -2.03559400 | 1.64066900  |
| C  | -2.24800000 | -1.35410900 | -1.87420300 |
| O  | -2.63344000 | -0.30134800 | -1.28597100 |
| O  | -1.20386900 | -2.03432100 | -1.64059000 |
| C  | -3.15782700 | -1.88273100 | -2.96523000 |
| H  | -2.58512400 | -2.47359900 | -3.68106700 |
| H  | -3.91015000 | -2.53214500 | -2.50491900 |
| H  | -3.67135200 | -1.05825300 | -3.46147300 |
| C  | 3.15591000  | -1.88602400 | 2.96539800  |
| H  | 3.66984200  | -1.06198000 | 3.46194800  |
| H  | 2.58256800  | -2.47661500 | 3.68095100  |
| H  | 3.90796000  | -2.53584600 | 2.50522400  |
| Pd | -1.61233800 | 0.93126900  | -0.00086400 |
| C  | -2.29897000 | -1.26736300 | 1.87268200  |
| O  | -1.57973300 | -2.12725200 | 1.28437500  |
| O  | -2.36628400 | -0.02297100 | 1.63927800  |
| C  | 2.29760300  | -1.26943100 | -1.87293300 |
| O  | 2.36602100  | -0.02512000 | -1.63947500 |
| O  | 1.57783900  | -2.12870500 | -1.28439500 |
| C  | 3.20923900  | -1.79375200 | -2.96452800 |
| H  | 2.75510700  | -2.65571700 | -3.45485900 |
| H  | 3.42749700  | -1.00462400 | -3.68512800 |
| H  | 4.15153500  | -2.11236900 | -2.50609000 |
| C  | -3.21170900 | -1.79076100 | 2.96379700  |
| H  | -2.76161400 | -2.65690100 | 3.45041800  |
| H  | -3.42447800 | -1.00293100 | 3.68749500  |
| H  | -4.15662000 | -2.10215200 | 2.50577300  |
| Pd | -0.00081600 | -1.85995800 | 0.00003700  |
| C  | -0.04685200 | 2.62320400  | -1.87347300 |
| O  | 1.05667100  | 2.43056600  | -1.28348900 |
| O  | -1.15846700 | 2.05934000  | -1.64158500 |
| C  | -0.04759200 | 3.67506000  | -2.96489700 |
| H  | 0.92272200  | 3.70402700  | -3.46231300 |
| H  | -0.84717800 | 3.47702100  | -3.67969900 |

|   |             |            |             |
|---|-------------|------------|-------------|
| H | -0.22963900 | 4.65213300 | -2.50468600 |
| C | 0.04938400  | 2.62318400 | 1.87354200  |
| O | 1.16020700  | 2.05760800 | 1.64185900  |
| O | -1.05447100 | 2.43171500 | 1.28385500  |
| C | 0.05243300  | 3.67556100 | 2.96445700  |
| H | 0.25661100  | 4.64925200 | 2.50636000  |
| H | -0.92314600 | 3.71995800 | 3.45011200  |
| H | 0.84018800  | 3.46533200 | 3.68897400  |

[Ni(OAc)<sub>2</sub>]<sub>3</sub>

Thermal correction to Gibbs Free Energy= 0.248125 Hartree

SCF Done: E(RM06) = -1883.74787442 Hartree

O 1

|   |             |             |             |
|---|-------------|-------------|-------------|
| C | 2.46292400  | -0.48380700 | -1.74530200 |
| O | 2.04647800  | -1.51444800 | -1.14041600 |
| O | 2.11215400  | 0.71590700  | -1.52962300 |
| C | -0.72617100 | 2.40149400  | 1.74518000  |
| O | -1.71049000 | 1.88713100  | 1.13853100  |
| O | 0.50224800  | 2.16805900  | 1.53213300  |
| C | -1.04313600 | 3.42315100  | 2.81615800  |
| H | -0.27375500 | 3.40725900  | 3.58959200  |
| H | -1.04231400 | 4.41815100  | 2.35769600  |
| H | -2.02910800 | 3.23666500  | 3.24293900  |
| C | 3.50989300  | -0.69840800 | -2.81724100 |
| H | 3.41888900  | -1.69670800 | -3.24639900 |
| H | 3.41971700  | 0.06774300  | -3.58878400 |
| H | 4.50042400  | -0.60306500 | -2.35902200 |
| C | -0.81095800 | 2.37554700  | -1.74329400 |
| O | 0.28889800  | 2.52996100  | -1.13659600 |
| O | -1.67452100 | 1.47128500  | -1.53003200 |
| C | 2.44524200  | -0.57407100 | 1.74353100  |
| O | 1.63063300  | -1.52226400 | 1.52840300  |
| O | 2.49057200  | 0.53672000  | 1.13875900  |
| C | 3.48837300  | -0.81060400 | 2.81459000  |
| H | 3.81833400  | 0.13636400  | 3.24288300  |
| H | 3.09037400  | -1.47053600 | 3.58692500  |
| H | 4.35055900  | -1.30704800 | 2.35592500  |
| C | -1.14738200 | 3.39055800  | -2.81467200 |
| H | -0.23684700 | 3.81146800  | -3.24225500 |
| H | -1.76468800 | 2.92998600  | -3.58746700 |
| H | -1.72599300 | 4.20015500  | -2.35645700 |
| C | -1.71798200 | -1.82961200 | 1.74428200  |
| O | -0.77865900 | -2.42306100 | 1.13843400  |
| O | -2.13340000 | -0.65049000 | 1.52989600  |

|    |             |             |             |   |             |             |             |
|----|-------------|-------------|-------------|---|-------------|-------------|-------------|
| C  | -2.44219700 | -2.61581500 | 2.81604700  | O | -1.42092500 | 2.24945800  | 0.53438300  |
| H  | -1.78434200 | -3.37160800 | 3.24627600  | O | -3.02888900 | 1.45627900  | -0.83774100 |
| H  | -2.81834700 | -1.94144300 | 3.58683000  | C | -3.75976200 | 2.68096900  | -0.64018300 |
| H  | -3.30050500 | -3.11887100 | 2.35730700  | H | -4.66484900 | 2.58105500  | -1.23842500 |
| C  | -1.65293300 | -1.88946400 | -1.74428900 | H | -3.16831400 | 3.53604400  | -0.97563800 |
| O  | -0.43762800 | -2.18332900 | -1.53077000 | H | -4.00782600 | 2.81470700  | 0.41541600  |
| O  | -2.33766600 | -1.01425200 | -1.13873200 | H | -1.11960100 | -1.97221500 | 0.25279900  |
| C  | -2.36270200 | -2.69066300 | -2.81459300 | C | -1.85191100 | -0.82257300 | 1.91787000  |
| H  | -2.77045400 | -3.59805600 | -2.35569300 | H | -2.12993300 | -1.70634000 | 2.49864300  |
| H  | -3.18517300 | -2.11550700 | -3.24094800 | H | -2.57817200 | -0.03337900 | 2.14636700  |
| H  | -1.65531500 | -2.99255800 | -3.58847200 | H | -0.87270800 | -0.48942600 | 2.27401400  |
| Ni | -1.78952600 | 0.38572400  | -0.00012200 |   |             |             |             |
| Ni | 0.56039900  | -1.74041700 | -0.00098100 |   |             |             |             |
| Ni | 1.22847600  | 1.35497900  | 0.00099000  |   |             |             |             |

3

Thermal correction to Gibbs Free Energy= 0.426642 Hartree

SCF Done: E(RM06) = -2010.74196813 Hartree

1

Thermal correction to Gibbs Free Energy= 0.252206 Hartree

SCF Done: E(RM06) = -841.116994337 Hartree

0 1

|   |             |             |             |
|---|-------------|-------------|-------------|
| C | 2.59876500  | -0.20032900 | -0.23659900 |
| C | 3.66362600  | -0.95354700 | -0.73630700 |
| C | 4.95728200  | -0.59482400 | -0.36454400 |
| C | 5.13377400  | 0.49599700  | 0.48708100  |
| C | 4.00285100  | 1.18476000  | 0.93225800  |
| H | 3.44978800  | -1.78790800 | -1.39404900 |
| H | 5.81274300  | -1.15469900 | -0.73134600 |
| H | 6.12340700  | 0.81074500  | 0.80266100  |
| H | 4.10277100  | 2.04055000  | 1.59703000  |
| N | 2.75709100  | 0.85044800  | 0.58293300  |
| C | 1.19014200  | -0.57673900 | -0.63308700 |
| O | 0.96440900  | -1.52480500 | -1.38647200 |
| N | 0.22787200  | 0.20825900  | -0.09168600 |
| H | 0.50943800  | 0.99702100  | 0.48030100  |
| C | -1.17559400 | 0.02716900  | -0.40828100 |
| C | -1.81534600 | -1.13985000 | 0.41683900  |
| H | -1.26113300 | -0.23699900 | -1.46780100 |
| C | -3.18412700 | -1.56949300 | -0.14558000 |
| C | -3.68501900 | -2.90769500 | 0.41139400  |
| H | -3.92866100 | -0.78829900 | 0.04766200  |
| H | -3.10575600 | -1.64910900 | -1.23746800 |
| H | -4.62555200 | -3.19927000 | -0.06733500 |
| H | -2.95865200 | -3.70823200 | 0.23071800  |
| H | -3.86852900 | -2.86183100 | 1.48959800  |
| C | -1.86134100 | 1.36768400  | -0.17473300 |

0 1

|    |             |             |             |
|----|-------------|-------------|-------------|
| Pd | 2.58272400  | -0.93871600 | -0.49321000 |
| O  | 1.07203100  | 0.10759900  | 2.30337200  |
| C  | 2.27989000  | -0.29981500 | 2.44329200  |
| O  | 3.06551200  | -0.75985000 | 1.56741200  |
| C  | 2.81048500  | -0.23960600 | 3.86460100  |
| H  | 3.90002000  | -0.19735000 | 3.85845200  |
| H  | 2.38974100  | 0.61778100  | 4.39267500  |
| H  | 2.49926900  | -1.14822800 | 4.39102900  |
| Pd | 0.12505900  | -0.01390100 | 0.46896500  |
| C  | 4.70966500  | 0.63825300  | -1.31348000 |
| O  | 3.48162800  | 0.81568700  | -0.85702400 |
| O  | 5.21763400  | -0.45746100 | -1.50934200 |
| C  | 5.43810400  | 1.94888300  | -1.57062500 |
| H  | 6.41660300  | 1.74314400  | -2.00567500 |
| H  | 4.85566000  | 2.58099300  | -2.24761800 |
| H  | 5.56416200  | 2.49628100  | -0.63088900 |
| C  | 0.32999300  | -0.49631700 | -2.46313300 |
| O  | -0.49019400 | -0.15762300 | -1.52741400 |
| O  | 1.53572400  | -0.83324500 | -2.34982900 |
| C  | 0.63473100  | -2.95295500 | 0.38318300  |
| O  | 1.76357100  | -2.79217400 | -0.15682000 |
| O  | -0.16355100 | -2.02974700 | 0.74857100  |
| C  | 0.18362000  | -4.37310800 | 0.64892400  |
| H  | 0.29896200  | -4.58574500 | 1.71683900  |
| H  | -0.87311100 | -4.48374000 | 0.39657500  |
| H  | 0.79120900  | -5.07633800 | 0.07950500  |
| C  | -0.26228200 | -0.50381000 | -3.85997600 |
| H  | -0.83050900 | 0.41340200  | -4.03272900 |

|                                                           |             |             |             |    |             |             |             |
|-----------------------------------------------------------|-------------|-------------|-------------|----|-------------|-------------|-------------|
| H                                                         | 0.52723400  | -0.60951500 | -4.60349900 | O  | 1.36978200  | 0.03794800  | 2.33465200  |
| H                                                         | -0.95660100 | -1.34568500 | -3.94735100 | C  | 2.30942900  | -0.82526900 | 2.33301100  |
| C                                                         | -1.02661900 | 2.80027000  | 0.45611500  | O  | 2.70852000  | -1.52139800 | 1.35988700  |
| C                                                         | -0.97349400 | 4.19583100  | 0.48344400  | C  | 3.00136800  | -1.04689600 | 3.66599800  |
| C                                                         | 0.24447000  | 4.84532200  | 0.31839900  | H  | 3.95584200  | -1.55234500 | 3.51884800  |
| C                                                         | 1.39203100  | 4.07548200  | 0.14635400  | H  | 3.14425100  | -0.09287900 | 4.17772000  |
| C                                                         | 1.28705900  | 2.68863100  | 0.15847700  | H  | 2.35778900  | -1.66959300 | 4.29610400  |
| H                                                         | -1.89916200 | 4.73356100  | 0.64772100  | Pd | -0.06717600 | 0.20936800  | 0.76895000  |
| H                                                         | 0.29583300  | 5.92974900  | 0.32712800  | C  | 4.60981600  | 0.04048500  | -1.06320800 |
| H                                                         | 2.36793700  | 4.52782900  | 0.00959500  | O  | 3.41005700  | 0.40083700  | -0.64483800 |
| H                                                         | 2.16092400  | 2.05938500  | 0.02157900  | O  | 4.92638800  | -1.09290700 | -1.39272100 |
| N                                                         | 0.10003900  | 2.06392000  | 0.30970100  | C  | 5.58856400  | 1.20985500  | -1.09820400 |
| C                                                         | -2.39953500 | 2.18526600  | 0.66992800  | H  | 6.56066100  | 0.86294500  | -1.45002100 |
| O                                                         | -3.15262400 | 2.72724000  | 1.47396400  | H  | 5.21435400  | 1.99388200  | -1.76395400 |
| C                                                         | -4.00229400 | 0.41557200  | 0.12361700  | H  | 5.69426200  | 1.64548800  | -0.09934600 |
| C                                                         | -4.73844200 | 0.12786800  | -1.20912100 | C  | 0.48975500  | -0.10440600 | -2.75290700 |
| H                                                         | -4.60909700 | 1.11124900  | 0.71575900  | O  | -0.28541900 | 0.36413100  | -1.87851500 |
| C                                                         | -6.23677000 | -0.15909900 | -0.96790300 | O  | 1.55881100  | -0.76176300 | -2.52673900 |
| H                                                         | -4.67564400 | 1.07628500  | -1.76227500 | C  | -0.26483400 | -2.69047400 | 0.32240700  |
| C                                                         | -7.08045100 | -0.17191100 | -2.24772400 | O  | 0.71548300  | -2.68969500 | -0.46267700 |
| H                                                         | -6.33769700 | -1.11347000 | -0.44246900 | O  | -0.69031000 | -1.69853000 | 1.02010400  |
| H                                                         | -6.63407800 | 0.61236200  | -0.29421100 | C  | -1.03141800 | -3.98167600 | 0.50799800  |
| H                                                         | -6.79626800 | -0.98819100 | -2.91906400 | H  | -0.61785900 | -4.51131300 | 1.37326700  |
| C                                                         | -3.81031400 | -0.81784400 | 1.02753100  | H  | -2.08474900 | -3.77175700 | 0.70166800  |
| O                                                         | -4.42164100 | -1.86112900 | 0.92630600  | H  | -0.91120500 | -4.61510200 | -0.37162200 |
| O                                                         | -2.91657300 | -0.56814400 | 1.99877400  | C  | 0.14152200  | 0.08241300  | -4.22096900 |
| C                                                         | -4.05434900 | -0.96191000 | -2.05287000 | H  | -0.25377900 | 1.08757000  | -4.38560800 |
| H                                                         | -4.17589500 | -1.94311300 | -1.58718000 | H  | 1.00909900  | -0.09615800 | -4.85650000 |
| H                                                         | -2.98208500 | -0.77458700 | -2.17054000 | H  | -0.64361300 | -0.63322700 | -4.48801200 |
| H                                                         | -4.48795400 | -1.00160900 | -3.05610800 | C  | -0.68963500 | 3.00981100  | 0.34566200  |
| C                                                         | -2.68821900 | -1.63605300 | 2.93781000  | C  | -0.51206400 | 4.38104300  | 0.19485200  |
| H                                                         | -2.06833500 | -1.20251200 | 3.72160100  | C  | 0.78623800  | 4.88814600  | 0.15499400  |
| H                                                         | -2.15688900 | -2.45105900 | 2.44397200  | C  | 1.85987100  | 4.00843400  | 0.27467900  |
| H                                                         | -3.63631800 | -1.99722700 | 3.34171900  | C  | 1.61702300  | 2.64676200  | 0.45290600  |
| H                                                         | -8.14085300 | -0.30206200 | -2.00900000 | H  | -1.38803600 | 5.01412700  | 0.11781500  |
| H                                                         | -6.97939300 | 0.76802100  | -2.80356500 | H  | 0.95527800  | 5.95282100  | 0.02816100  |
| N                                                         | -2.73720800 | 1.11442400  | -0.09132500 | H  | 2.88503100  | 4.35863000  | 0.23073900  |
| H                                                         | -2.08131000 | 0.73941600  | -0.77015400 | H  | 2.41558500  | 1.91454800  | 0.51550200  |
|                                                           |             |             |             | N  | 0.36105100  | 2.17458000  | 0.49360900  |
| TS1                                                       |             |             |             | C  | -2.07538600 | 2.42323200  | 0.41223100  |
| Thermal correction to Gibbs Free Energy= 0.431800 Hartree |             |             |             | O  | -2.99285100 | 3.06121000  | 0.89561300  |
| SCF Done: E(RM06) = -2010.73743710 Hartree                |             |             |             | C  | -3.52229500 | 0.47018200  | 0.04294400  |
| O 1                                                       |             |             |             | C  | -4.06502400 | -0.01732300 | -1.32246900 |
| Pd                                                        | 2.10079400  | -1.13272100 | -0.58626900 | H  | -4.18791700 | 1.26194900  | 0.40685800  |

|                                                           |             |             |             |   |             |             |             |
|-----------------------------------------------------------|-------------|-------------|-------------|---|-------------|-------------|-------------|
| C                                                         | -5.59199500 | -0.24507500 | -1.24076500 | O | 1.02919300  | 0.19080900  | -2.70113400 |
| H                                                         | -3.90630500 | 0.83444300  | -2.00162600 | C | -0.72364600 | -2.63061500 | -0.40998300 |
| C                                                         | -6.26566700 | -0.43919800 | -2.60385500 | O | 0.09410500  | -2.30627300 | -1.30771900 |
| H                                                         | -5.78891600 | -1.11075900 | -0.60061500 | O | -0.94262700 | -2.01695600 | 0.69894900  |
| H                                                         | -6.05005200 | 0.62202200  | -0.74540200 | C | -1.55995000 | -3.87483200 | -0.62101600 |
| H                                                         | -5.92473600 | -1.35021500 | -3.10468100 | H | -1.20709800 | -4.65695800 | 0.05944000  |
| C                                                         | -3.52329500 | -0.58424800 | 1.16168200  | H | -2.60280600 | -3.66077300 | -0.37623600 |
| O                                                         | -4.02868900 | -1.68445200 | 1.09359000  | H | -1.46367700 | -4.22420900 | -1.64878600 |
| O                                                         | -2.95812700 | -0.08578800 | 2.27395900  | C | 0.25759600  | 1.99049900  | -4.01781700 |
| C                                                         | -3.31514800 | -1.23036900 | -1.89866700 | H | 0.53883900  | 3.03530200  | -3.85702300 |
| H                                                         | -3.50744100 | -2.12232300 | -1.29863200 | H | 0.91538200  | 1.53579800  | -4.75805900 |
| H                                                         | -2.23666100 | -1.05735500 | -1.93683100 | H | -0.77374100 | 1.98363800  | -4.38425200 |
| H                                                         | -3.64637800 | -1.42781300 | -2.92211700 | C | -0.13780000 | 2.63334000  | 1.47947000  |
| C                                                         | -2.88211100 | -0.98513100 | 3.39723400  | C | 0.24943000  | 3.94791400  | 1.70915100  |
| H                                                         | -2.48223400 | -0.39078200 | 4.21792100  | C | 1.58220400  | 4.19687100  | 2.03672500  |
| H                                                         | -2.20999500 | -1.81018700 | 3.15594600  | C | 2.46916400  | 3.12594200  | 2.13205300  |
| H                                                         | -3.87354100 | -1.37142500 | 3.64317600  | C | 2.00585100  | 1.82931600  | 1.91204400  |
| H                                                         | -7.35127100 | -0.51824500 | -2.48798100 | H | -0.48984900 | 4.73552100  | 1.62451500  |
| H                                                         | -6.06479200 | 0.40563300  | -3.27337100 | H | 1.92372800  | 5.21223000  | 2.21058500  |
| N                                                         | -2.18712100 | 1.10992700  | -0.06764900 | H | 3.51557600  | 3.28074800  | 2.36948600  |
| H                                                         | -1.68406800 | 0.93159500  | -0.95428900 | H | 2.64566200  | 0.95987900  | 1.96528200  |
|                                                           |             |             |             | N | 0.72246000  | 1.60357200  | 1.60119800  |
| 4                                                         |             |             |             | C | -1.54442800 | 2.27392400  | 1.12062400  |
| Thermal correction to Gibbs Free Energy= 0.430326 Hartree |             |             |             | O | -2.48160500 | 2.97955300  | 1.42342200  |
| SCF Done: E(RM06) = -2010.74788084 Hartree                |             |             |             | C | -3.07613500 | 0.61462000  | 0.15753700  |
| O 1                                                       |             |             |             | C | -3.45954600 | 0.62244500  | -1.34371200 |
| Pd                                                        | 1.63493400  | -0.89320000 | -1.08409600 | H | -3.67645700 | 1.39552700  | 0.63798800  |
| O                                                         | 1.43431400  | -1.21257700 | 2.19707200  | C | -4.99564300 | 0.72497400  | -1.49045600 |
| C                                                         | 2.26466100  | -1.99906200 | 1.61802300  | H | -3.03326800 | 1.55864600  | -1.73001700 |
| O                                                         | 2.45348800  | -2.12059400 | 0.38281400  | C | -5.46506000 | 1.02882300  | -2.91775000 |
| C                                                         | 3.08089300  | -2.88164600 | 2.54119300  | H | -5.45188800 | -0.20656300 | -1.13954300 |
| H                                                         | 3.97968000  | -3.23022000 | 2.03225400  | H | -5.36014000 | 1.52202600  | -0.82780600 |
| H                                                         | 3.33595800  | -2.34254300 | 3.45569600  | H | -5.22581600 | 0.21671500  | -3.61064200 |
| H                                                         | 2.47306000  | -3.74806600 | 2.82269100  | C | -3.43572500 | -0.65568700 | 0.93355600  |
| Pd                                                        | -0.08093500 | -0.22728500 | 1.19559100  | O | -4.08696200 | -1.58309600 | 0.50380300  |
| C                                                         | 4.18321200  | 0.27523200  | -1.39889400 | O | -3.02611800 | -0.55603600 | 2.21239100  |
| O                                                         | 3.06734800  | 0.47591800  | -0.72506800 | C | -2.86810800 | -0.53261800 | -2.16494100 |
| O                                                         | 4.39515600  | -0.65324200 | -2.16488100 | H | -3.32759200 | -1.48335600 | -1.88572000 |
| C                                                         | 5.22207000  | 1.36112000  | -1.12498900 | H | -1.78720000 | -0.61788300 | -2.04088700 |
| H                                                         | 6.14976600  | 1.11964800  | -1.64497000 | H | -3.04981100 | -0.36809200 | -3.23073600 |
| H                                                         | 4.84836300  | 2.32946400  | -1.47266200 | C | -3.27775200 | -1.70938800 | 3.03863100  |
| H                                                         | 5.41279800  | 1.44841700  | -0.05065600 | H | -2.94079200 | -1.43185400 | 4.03680100  |
| C                                                         | 0.31858100  | 1.25072600  | -2.68952200 | H | -2.70525900 | -2.55805800 | 2.65997500  |
| O                                                         | -0.33039100 | 1.72763600  | -1.72342900 | H | -4.34266300 | -1.95115300 | 3.04151800  |

|                                                           |             |             |             |                                                           |             |             |             |
|-----------------------------------------------------------|-------------|-------------|-------------|-----------------------------------------------------------|-------------|-------------|-------------|
| H                                                         | -6.55033800 | 1.17005300  | -2.94340100 | H                                                         | 0.42699100  | 4.86648000  | -1.18076100 |
| H                                                         | -5.00216100 | 1.94484600  | -3.30331800 | H                                                         | -1.96066000 | 5.38140700  | -1.84735100 |
| N                                                         | -1.65321800 | 1.03074100  | 0.40137900  | H                                                         | -3.52340500 | 3.46209400  | -2.25529300 |
| H                                                         | -1.10333500 | 1.18089700  | -0.52764300 | H                                                         | -2.64906900 | 1.11902300  | -2.00720400 |
|                                                           |             |             |             | N                                                         | -0.75740900 | 1.74213800  | -1.48014000 |
| TS2                                                       |             |             |             | C                                                         | 1.48145200  | 2.37725900  | -0.83549000 |
| Thermal correction to Gibbs Free Energy= 0.427975 Hartree |             |             |             | O                                                         | 2.40320300  | 3.16140200  | -0.96417300 |
| SCF Done: E(RM06) = -2010.74329028 Hartree                |             |             |             | C                                                         | 3.00484500  | 0.63170200  | -0.11323200 |
| O 1                                                       |             |             |             | C                                                         | 3.43038000  | 0.46698800  | 1.36883100  |
| Pd                                                        | -1.60090400 | -1.02516700 | 1.00284600  | H                                                         | 3.59739900  | 1.46692900  | -0.50475800 |
| O                                                         | -1.47140400 | -1.02888200 | -2.27076600 | C                                                         | 4.96933700  | 0.56676500  | 1.48925000  |
| C                                                         | -2.30728500 | -1.84878900 | -1.75844500 | H                                                         | 3.01314700  | 1.34960900  | 1.87149500  |
| O                                                         | -2.49558600 | -2.07751100 | -0.53418700 | C                                                         | 5.47254500  | 0.71617100  | 2.92964300  |
| C                                                         | -3.14371500 | -2.64268800 | -2.74228800 | H                                                         | 5.42415300  | -0.31526300 | 1.02672800  |
| H                                                         | -2.55474900 | -3.49866900 | -3.08847900 | H                                                         | 5.31098800  | 1.43599600  | 0.91073000  |
| H                                                         | -4.04953500 | -3.01045300 | -2.25992800 | H                                                         | 5.25580800  | -0.16908000 | 3.53511800  |
| H                                                         | -3.38717800 | -2.03122000 | -3.61331100 | C                                                         | 3.37417600  | -0.53382600 | -1.03455300 |
| Pd                                                        | 0.05565500  | -0.10468700 | -1.20670800 | O                                                         | 4.04430800  | -1.49555900 | -0.72371400 |
| C                                                         | -4.08813700 | 0.17590700  | 1.55794600  | O                                                         | 2.95414700  | -0.29490600 | -2.29294400 |
| O                                                         | -3.00785200 | 0.40262200  | 0.83539800  | C                                                         | 2.87311500  | -0.78189800 | 2.06778400  |
| O                                                         | -4.27087400 | -0.79696000 | 2.27518100  | H                                                         | 3.33892800  | -1.68709300 | 1.67190400  |
| C                                                         | -5.12393700 | 1.28729400  | 1.40560000  | H                                                         | 1.79134200  | -0.87500500 | 1.95578300  |
| H                                                         | -5.99586800 | 1.06116800  | 2.02028900  | H                                                         | 3.07719400  | -0.73867200 | 3.14167300  |
| H                                                         | -4.69508600 | 2.24690900  | 1.71033000  | C                                                         | 3.22434100  | -1.33965600 | -3.24590500 |
| H                                                         | -5.42746200 | 1.38088100  | 0.35799900  | H                                                         | 2.86537000  | -0.96196700 | -4.20283900 |
| C                                                         | -0.20978700 | 0.99292500  | 2.78138500  | H                                                         | 2.68204000  | -2.24294600 | -2.96000200 |
| O                                                         | 0.45510600  | 1.59142600  | 1.86851300  | H                                                         | 4.29519000  | -1.55003200 | -3.28942200 |
| O                                                         | -0.87444700 | -0.07209100 | 2.67900500  | H                                                         | 6.55731300  | 0.86341400  | 2.94516600  |
| C                                                         | 0.72888500  | -2.67957900 | 0.13270700  | H                                                         | 5.01397300  | 1.58044600  | 3.42468500  |
| O                                                         | -0.10329400 | -2.48146300 | 1.05791600  | N                                                         | 1.57824200  | 1.06694500  | -0.29110200 |
| O                                                         | 0.94460700  | -1.93038500 | -0.88427800 | H                                                         | 0.95545600  | 1.16971800  | 0.80223600  |
| C                                                         | 1.57694200  | -3.93158500 | 0.19942200  |                                                           |             |             |             |
| H                                                         | 1.22066000  | -4.63885800 | -0.55706500 | 2                                                         |             |             |             |
| H                                                         | 2.61426100  | -3.68182600 | -0.03417900 | Thermal correction to Gibbs Free Energy= 0.375102 Hartree |             |             |             |
| H                                                         | 1.49682600  | -4.39201500 | 1.18398000  | SCF Done: E(RM06) = -1781.70773891 Hartree                |             |             |             |
| C                                                         | -0.17138800 | 1.63866300  | 4.15203600  | O 1                                                       |             |             |             |
| H                                                         | -0.86757900 | 1.14855600  | 4.83163500  | Pd                                                        | -1.72008700 | -1.20103000 | 0.69371700  |
| H                                                         | 0.84575600  | 1.57084200  | 4.55088400  | O                                                         | -1.41808800 | -0.40829100 | -2.44725800 |
| H                                                         | -0.41441300 | 2.70059800  | 4.05830900  | C                                                         | -2.27840300 | -1.30863100 | -2.19820900 |
| C                                                         | 0.08782500  | 2.76047500  | -1.23129200 | O                                                         | -2.52322000 | -1.83931200 | -1.07605500 |
| C                                                         | -0.30265600 | 4.08758100  | -1.36796900 | C                                                         | -3.08520800 | -1.82213800 | -3.37433000 |
| C                                                         | -1.61870000 | 4.35677500  | -1.74127400 | H                                                         | -2.47270700 | -2.53966000 | -3.93039300 |
| C                                                         | -2.49015400 | 3.29286800  | -1.97377400 | H                                                         | -3.99163300 | -2.32048300 | -3.03068300 |
| C                                                         | -2.02566800 | 1.98617600  | -1.83865000 | H                                                         | -3.32750500 | -0.99894500 | -4.04961500 |

|    |             |             |             |                                                           |             |             |             |
|----|-------------|-------------|-------------|-----------------------------------------------------------|-------------|-------------|-------------|
| Pd | 0.15691900  | 0.20517100  | -1.20285100 | O                                                         | 4.03699000  | -1.56536100 | -0.80205800 |
| C  | -4.20872500 | -0.09338300 | 1.40645500  | O                                                         | 3.15723700  | -0.10989200 | -2.28301100 |
| O  | -3.09724600 | 0.25485300  | 0.78450800  | C                                                         | 2.72096300  | -1.12410600 | 1.95636900  |
| O  | -4.41260900 | -1.17835200 | 1.93199300  | H                                                         | 3.19589100  | -2.00116700 | 1.51106400  |
| C  | -5.25021000 | 1.02098400  | 1.39009900  | H                                                         | 1.65876500  | -1.15640200 | 1.70420500  |
| H  | -6.07260200 | 0.76180000  | 2.05796800  | H                                                         | 2.79665800  | -1.21365400 | 3.04463700  |
| H  | -4.80546400 | 1.97370100  | 1.69083800  | C                                                         | 3.44484500  | -1.04843500 | -3.33250800 |
| H  | -5.63780300 | 1.14492000  | 0.37347100  | H                                                         | 3.20348100  | -0.53207300 | -4.26142900 |
| C  | -0.57684500 | 0.27604800  | 3.11677700  | H                                                         | 2.81927700  | -1.93571300 | -3.21381200 |
| O  | 0.14772200  | 1.11729500  | 2.40271700  | H                                                         | 4.49807800  | -1.33799300 | -3.31363500 |
| O  | -1.15424500 | -0.71929200 | 2.67144500  | H                                                         | 6.39438400  | 0.15909700  | 3.32152400  |
| C  | 0.64172500  | -2.66008300 | -0.37354300 | H                                                         | 4.85108800  | 0.88868500  | 3.78066000  |
| O  | -0.25101100 | -2.65241400 | 0.52382000  | N                                                         | 1.72977700  | 1.08492300  | -0.21704500 |
| O  | 0.92848200  | -1.71736400 | -1.18247700 | H                                                         | 0.29382100  | 0.81088300  | 1.47834400  |
| C  | 1.46673600  | -3.92080500 | -0.51919600 |                                                           |             |             |             |
| H  | 1.16473800  | -4.43361800 | -1.43863700 |                                                           |             |             |             |
| H  | 2.52147300  | -3.65262100 | -0.61275000 | TS3                                                       |             |             |             |
| H  | 1.30341500  | -4.58503000 | 0.32930100  | Thermal correction to Gibbs Free Energy= 0.375961 Hartree |             |             |             |
| C  | -0.63121900 | 0.62378800  | 4.57612900  | SCF Done: E(RM06) = -1781.68951106 Hartree                |             |             |             |
| H  | -1.32413600 | -0.04126800 | 5.08857900  | 0 1                                                       |             |             |             |
| H  | 0.37020900  | 0.53082200  | 5.00735100  | C                                                         | -0.50983600 | 2.95221300  | -0.21773900 |
| H  | -0.94328900 | 1.66533500  | 4.69230600  | C                                                         | -1.15002800 | 4.17685800  | -0.06421000 |
| C  | 0.34602700  | 3.00385700  | -0.64267700 | C                                                         | -2.39291900 | 4.36381400  | -0.66334500 |
| C  | 0.03456200  | 4.35485700  | -0.53875800 | C                                                         | -2.95787900 | 3.32057400  | -1.40081700 |
| C  | -1.20281000 | 4.79401100  | -1.00507600 | C                                                         | -2.26351200 | 2.12014300  | -1.51598400 |
| C  | -2.08740400 | 3.86933400  | -1.56353000 | H                                                         | -0.64824500 | 4.93685100  | 0.52366100  |
| C  | -1.71016900 | 2.53185000  | -1.64551100 | H                                                         | -2.91737800 | 5.30882000  | -0.55966100 |
| H  | 0.77542600  | 5.01368300  | -0.10062800 | H                                                         | -3.92304000 | 3.42751600  | -1.88360000 |
| H  | -1.47649100 | 5.84228000  | -0.93504600 | H                                                         | -2.63743500 | 1.27173700  | -2.07680200 |
| H  | -3.06104600 | 4.17116000  | -1.93318900 | N                                                         | -1.06761500 | 1.95683600  | -0.93042900 |
| H  | -2.34338200 | 1.76295000  | -2.06880300 | C                                                         | 0.82845800  | 2.66885100  | 0.40589200  |
| N  | -0.51361900 | 2.12578600  | -1.19369600 | O                                                         | 1.38871200  | 3.53446600  | 1.08450500  |
| C  | 1.66602600  | 2.45006900  | -0.18227100 | N                                                         | 1.27678900  | 1.41530200  | 0.14487100  |
| O  | 2.56106600  | 3.21737100  | 0.17829900  | Pd                                                        | 0.06981100  | 0.27491300  | -1.01076300 |
| C  | 3.08799000  | 0.54370800  | -0.00479600 | C                                                         | -1.88782000 | -1.82621300 | -2.08337900 |
| C  | 3.39399900  | 0.16764500  | 1.47110800  | O                                                         | -1.92435500 | -2.50831800 | -1.01215500 |
| H  | 3.76182100  | 1.38005600  | -0.23891200 | O                                                         | -1.30937500 | -0.71643400 | -2.27819300 |
| C  | 4.91874100  | 0.16072200  | 1.72200400  | C                                                         | -2.60727500 | -2.43768300 | -3.27294500 |
| H  | 2.98032100  | 1.00692100  | 2.04594800  | H                                                         | -3.32110900 | -3.19438900 | -2.94813900 |
| C  | 5.30900600  | 0.07723500  | 3.20232700  | H                                                         | -1.86225900 | -2.90493800 | -3.92526900 |
| H  | 5.36932900  | -0.67241200 | 1.17200500  | H                                                         | -3.10774500 | -1.65451700 | -3.84613500 |
| H  | 5.34330400  | 1.08251100  | 1.30232000  | C                                                         | 2.52957800  | 1.01004400  | 0.77792100  |
| H  | 5.00296300  | -0.87065200 | 3.65613600  | C                                                         | 2.36180800  | 0.00265400  | 1.95461700  |
| C  | 3.45764200  | -0.52360600 | -1.03572200 | H                                                         | 2.96153000  | 1.93727400  | 1.18108800  |
|    |             |             |             | C                                                         | 1.17089000  | 0.35693800  | 2.87832300  |





|                                                           |             |             |             |                                                           |             |             |             |
|-----------------------------------------------------------|-------------|-------------|-------------|-----------------------------------------------------------|-------------|-------------|-------------|
| C                                                         | -3.12406000 | 0.13093400  | 1.68380300  | O                                                         | -4.22886600 | -0.27589600 | -0.23527500 |
| O                                                         | -2.86652000 | -1.13231100 | 1.43054300  | O                                                         | -3.12661400 | -1.78996800 | -1.48472300 |
| C                                                         | -4.57932100 | 0.34844300  | 2.07811000  | C                                                         | -3.65458900 | -0.87158900 | 2.73917000  |
| H                                                         | -4.76040700 | 1.41244500  | 2.23433200  | H                                                         | -3.52569900 | -1.86867000 | 3.17792900  |
| H                                                         | -4.80099600 | -0.20240700 | 2.99705300  | H                                                         | -4.54406300 | -0.88061300 | 2.10647400  |
| H                                                         | -5.24431500 | -0.03774400 | 1.30044700  | H                                                         | -3.83297800 | -0.16801800 | 3.55942000  |
| O                                                         | -2.31089100 | 1.04921900  | 1.62738600  | C                                                         | -4.05765100 | -1.53135700 | -2.54752000 |
| H                                                         | -0.34397300 | -0.21071500 | 2.06841000  | H                                                         | -3.78451600 | -2.21660600 | -3.34976200 |
|                                                           |             |             |             | H                                                         | -3.96962800 | -0.49492500 | -2.88226500 |
| TS2- $\delta$                                             |             |             |             | H                                                         | -5.08310600 | -1.71473500 | -2.21692800 |
| Thermal correction to Gibbs Free Energy= 0.375559 Hartree |             |             |             | H                                                         | 0.33440800  | 0.88303200  | 3.75376000  |
| SCF Done: E(RM06) = -1781.67450173 Hartree                |             |             |             | C                                                         | -1.88166000 | 2.12050200  | -0.43168300 |
| O 1                                                       |             |             |             | O                                                         | -1.19185500 | 2.48625500  | 0.57030700  |
| C                                                         | 1.09223500  | -2.67139800 | -0.35094600 | O                                                         | -1.61727400 | 1.16518600  | -1.22279100 |
| C                                                         | 1.95577600  | -3.75675800 | -0.24466700 | C                                                         | -3.16806000 | 2.87094500  | -0.69366600 |
| C                                                         | 3.16863600  | -3.71905000 | -0.92836300 | H                                                         | -3.25338000 | 3.73759700  | -0.03861200 |
| C                                                         | 3.48311400  | -2.59663900 | -1.70000700 | H                                                         | -3.99837900 | 2.17936200  | -0.52188300 |
| C                                                         | 2.57471500  | -1.54377200 | -1.76341700 | H                                                         | -3.20156000 | 3.18193600  | -1.74106600 |
| H                                                         | 1.64110400  | -4.59152700 | 0.37111200  | Pd                                                        | 0.69849800  | 1.75660800  | 0.97994600  |
| H                                                         | 3.86158800  | -4.55270000 | -0.86578700 | C                                                         | 2.83577900  | 0.11921900  | 1.89308100  |
| H                                                         | 4.41560700  | -2.53202600 | -2.25000700 | O                                                         | 2.66349100  | 1.27283800  | 1.38529400  |
| H                                                         | 2.74740700  | -0.64299900 | -2.34157200 | C                                                         | 4.25277000  | -0.37564700 | 2.06270300  |
| N                                                         | 1.41079000  | -1.59613800 | -1.09641900 | H                                                         | 4.40676800  | -1.23731100 | 1.40595800  |
| C                                                         | -0.24170400 | -2.64194300 | 0.34513600  | H                                                         | 4.39689900  | -0.71735900 | 3.09065800  |
| O                                                         | -0.59133800 | -3.59991200 | 1.04374300  | H                                                         | 4.97062500  | 0.40634000  | 1.81739200  |
| N                                                         | -0.93423000 | -1.50196700 | 0.10769600  | O                                                         | 1.87935800  | -0.62873300 | 2.25373500  |
| Pd                                                        | -0.02157300 | -0.15059600 | -1.09051700 | H                                                         | 0.81700500  | 0.18115600  | 2.22329200  |
| C                                                         | 1.51203000  | 2.30917300  | -1.86673600 |                                                           |             |             |             |
| O                                                         | 1.40383900  | 2.80065800  | -0.70611700 | 6                                                         |             |             |             |
| O                                                         | 1.13272300  | 1.15897800  | -2.26357700 | Thermal correction to Gibbs Free Energy= 0.378340 Hartree |             |             |             |
| C                                                         | 2.13984700  | 3.20471300  | -2.91973400 | SCF Done: E(RM06) = -1781.71930082 Hartree                |             |             |             |
| H                                                         | 2.65618500  | 2.60569600  | -3.67189000 | O 1                                                       |             |             |             |
| H                                                         | 2.82146900  | 3.91907900  | -2.45666200 | C                                                         | 0.09843100  | 2.98982200  | 0.64471000  |
| H                                                         | 1.34152100  | 3.76218600  | -3.42144100 | C                                                         | -0.30894700 | 4.22777300  | 1.13215500  |
| C                                                         | -2.26279900 | -1.39689400 | 0.70144200  | C                                                         | -1.37477100 | 4.87638100  | 0.51377100  |
| C                                                         | -2.39978500 | -0.46118000 | 1.94302900  | C                                                         | -1.99992000 | 4.26905300  | -0.57825300 |
| H                                                         | -2.50511200 | -2.41610700 | 1.03662700  | C                                                         | -1.54385800 | 3.02848800  | -1.01375500 |
| C                                                         | -1.16340000 | -0.46466200 | 2.88211700  | H                                                         | 0.23189200  | 4.63657100  | 1.97806400  |
| H                                                         | -2.56019500 | 0.55809600  | 1.58414600  | H                                                         | -1.71315600 | 5.84415000  | 0.87139500  |
| C                                                         | -0.24812200 | 0.78550200  | 2.82984600  | H                                                         | -2.82736400 | 4.74531200  | -1.09280900 |
| H                                                         | -1.53605800 | -0.50516500 | 3.91438200  | H                                                         | -1.97349000 | 2.50719600  | -1.86128400 |
| H                                                         | -0.58125700 | -1.38120000 | 2.74901500  | N                                                         | -0.52138700 | 2.40987200  | -0.40172700 |
| H                                                         | -0.86415900 | 1.68388600  | 2.76703700  | C                                                         | 1.25407800  | 2.23985900  | 1.25171100  |
| C                                                         | -3.30925100 | -1.05974200 | -0.36924400 | O                                                         | 1.84671000  | 2.71617200  | 2.22682700  |

|    |             |             |             |                                                           |             |             |             |
|----|-------------|-------------|-------------|-----------------------------------------------------------|-------------|-------------|-------------|
| N  | 1.50917900  | 1.06890800  | 0.62213900  | O                                                         | -4.37313200 | -0.92424400 | 0.13765800  |
| Pd | 0.29651000  | 0.61209400  | -0.93035300 | H                                                         | -3.62153400 | -1.11243400 | -0.51517000 |
| C  | -2.06703800 | -0.46931800 | -2.40139200 |                                                           |             |             |             |
| O  | -2.33207800 | -1.19820100 | -1.39533900 |                                                           |             |             |             |
| O  | -1.08076000 | 0.32096800  | -2.50244000 | 3-6                                                       |             |             |             |
| C  | -3.00269200 | -0.55593400 | -3.59324100 | Thermal correction to Gibbs Free Energy= 0.496549 Hartree |             |             |             |
| H  | -2.73416600 | 0.16854700  | -4.36203700 | SCF Done: E(RM06) = -2091.85790790 Hartree                |             |             |             |
| H  | -4.03471400 | -0.39476100 | -3.26708900 | 0 1                                                       |             |             |             |
| H  | -2.94997300 | -1.56665000 | -4.00953700 | C                                                         | -2.67527500 | 2.30082500  | -0.32402200 |
| C  | 2.61081000  | 0.26156400  | 1.13262900  | C                                                         | -3.12777800 | 3.59182900  | -0.57790800 |
| C  | 2.20657100  | -1.05341300 | 1.86993900  | C                                                         | -2.83158200 | 4.59957300  | 0.33795300  |
| H  | 3.12910800  | 0.90916000  | 1.85450400  | C                                                         | -2.08968000 | 4.28732800  | 1.47934200  |
| C  | 0.86682300  | -0.96119000 | 2.64937100  | C                                                         | -1.66661900 | 2.97531000  | 1.67340900  |
| H  | 2.09785200  | -1.82814000 | 1.10913400  | H                                                         | -3.70251700 | 3.75448200  | -1.48266300 |
| C  | -0.15705600 | -2.02980000 | 2.27681700  | H                                                         | -3.17636800 | 5.61531800  | 0.16883500  |
| H  | 1.07586600  | -1.07408000 | 3.72531600  | H                                                         | -1.83971600 | 5.04350900  | 2.21530600  |
| H  | 0.41455700  | 0.03007000  | 2.55229500  | H                                                         | -1.10177300 | 2.65332500  | 2.54064400  |
| H  | 0.29211800  | -3.01995400 | 2.14785300  | N                                                         | -1.95748400 | 2.01662900  | 0.78066900  |
| C  | 3.63414700  | -0.02238000 | 0.02412700  | C                                                         | -2.96146400 | 1.15769600  | -1.26394000 |
| O  | 4.20882200  | -1.07889600 | -0.15125200 | O                                                         | -3.56925700 | 1.37518900  | -2.31881100 |
| O  | 3.87504500  | 1.07413800  | -0.71922500 | N                                                         | -2.47242500 | -0.02351400 | -0.81763300 |
| C  | 3.34686300  | -1.49402400 | 2.80542600  | Pd                                                        | -1.55206000 | 0.02686600  | 0.99477000  |
| H  | 3.50505200  | -0.75584500 | 3.60148200  | C                                                         | 0.60118300  | 0.11626300  | 3.02094300  |
| H  | 4.28316900  | -1.62566400 | 2.25910100  | O                                                         | 1.44035500  | -0.19547700 | 2.14938800  |
| H  | 3.09898100  | -2.44844600 | 3.28304100  | O                                                         | -0.65516700 | 0.33136200  | 2.84282800  |
| C  | 4.81627000  | 0.89437800  | -1.78836800 | C                                                         | 1.07097300  | 0.24169100  | 4.46268300  |
| H  | 4.91181500  | 1.87100000  | -2.26281800 | H                                                         | 2.12215500  | 0.53270800  | 4.49291600  |
| H  | 4.44110700  | 0.15699100  | -2.50232000 | H                                                         | 0.97202200  | -0.73636800 | 4.94619400  |
| H  | 5.78195800  | 0.55798100  | -1.40235400 | H                                                         | 0.45588500  | 0.95354400  | 5.01634200  |
| H  | -0.97961200 | -2.07444100 | 2.99821700  | C                                                         | -2.68888200 | -1.19519500 | -1.65793800 |
| C  | 1.21361000  | -2.24206700 | -1.28379400 | C                                                         | -1.40006400 | -1.82346800 | -2.27244600 |
| O  | 0.36604600  | -2.72324300 | -0.47985500 | H                                                         | -3.33150000 | -0.85002200 | -2.48065600 |
| O  | 1.37631400  | -1.01636200 | -1.58605000 | C                                                         | -0.30450900 | -0.78489400 | -2.63131700 |
| C  | 2.18178500  | -3.20480700 | -1.93982000 | H                                                         | -0.98501800 | -2.50316400 | -1.52771900 |
| H  | 1.89564700  | -4.23741100 | -1.74051800 | H                                                         | -0.20057500 | -0.74164600 | -3.72720500 |
| H  | 3.17737800  | -3.00443500 | -1.53153500 | H                                                         | -0.61037700 | 0.22438400  | -2.34130100 |
| H  | 2.21812800  | -3.01961200 | -3.01631100 | C                                                         | -3.50906600 | -2.25377100 | -0.90632000 |
| Pd | -1.10790800 | -1.64161600 | 0.53028500  | O                                                         | -3.29774500 | -3.45085500 | -0.91905700 |
| C  | -3.91973200 | -0.73124400 | 1.35405500  | O                                                         | -4.54756000 | -1.70008700 | -0.25358700 |
| O  | -2.73321300 | -0.83758800 | 1.69664500  | C                                                         | -1.76477900 | -2.66835600 | -3.50610500 |
| C  | -4.98399000 | -0.36692300 | 2.35384700  | H                                                         | -2.19007400 | -2.04002700 | -4.29864900 |
| H  | -5.67801600 | -1.20659300 | 2.46067000  | H                                                         | -2.48543500 | -3.44896000 | -3.25415300 |
| H  | -5.56068400 | 0.48783100  | 1.99025400  | H                                                         | -0.87074800 | -3.15455900 | -3.91230300 |
| H  | -4.53049000 | -0.13902700 | 3.31733500  | C                                                         | -5.36525900 | -2.61727300 | 0.48926800  |
|    |             |             |             | H                                                         | -6.16459000 | -2.01484400 | 0.92061400  |

|                                                           |             |             |             |    |             |             |             |
|-----------------------------------------------------------|-------------|-------------|-------------|----|-------------|-------------|-------------|
| H                                                         | -4.77778500 | -3.09435400 | 1.27760400  | C  | 1.74500100  | -0.43101600 | 4.33370000  |
| H                                                         | -5.77602600 | -3.38899600 | -0.16676800 | C  | 1.64653600  | -1.70990100 | 3.78181200  |
| C                                                         | -0.61295100 | -2.83403100 | 1.00494400  | C  | 0.77882200  | -1.91974900 | 2.71332600  |
| O                                                         | 0.45398600  | -2.57831000 | 0.38685700  | H  | 0.99645900  | 1.61736400  | 4.17698300  |
| O                                                         | -1.52665500 | -2.00109800 | 1.31628400  | H  | 2.41286500  | -0.24384700 | 5.16918500  |
| C                                                         | -0.89965100 | -4.27399700 | 1.37916400  | H  | 2.23070500  | -2.53854900 | 4.16639200  |
| H                                                         | -0.00810000 | -4.88924800 | 1.25706900  | H  | 0.64951600  | -2.88343000 | 2.23409000  |
| H                                                         | -1.69446300 | -4.63545100 | 0.71893900  | N  | 0.04153700  | -0.91653900 | 2.21385400  |
| H                                                         | -1.26500300 | -4.32877000 | 2.40736600  | C  | -0.74636800 | 1.38254300  | 2.11176000  |
| Pd                                                        | 1.24334300  | -0.61747700 | -0.08668100 | O  | -0.64295600 | 2.55827100  | 2.49838000  |
| C                                                         | 1.08624200  | -1.09004700 | -2.07580800 | N  | -1.56487100 | 0.90033900  | 1.15361200  |
| H                                                         | 1.32354600  | -2.15850800 | -2.09367700 | Pd | -1.30168400 | -1.06185300 | 0.68627500  |
| H                                                         | 1.86169400  | -0.52820600 | -2.60007000 | C  | -0.13867200 | -3.36383500 | -0.75936700 |
| C                                                         | 3.26185500  | 0.07014500  | -0.36736200 | O  | 0.34805500  | -2.58461400 | -1.62193200 |
| C                                                         | 2.52513100  | 1.07726900  | -0.52264500 | O  | -0.79433200 | -3.04899600 | 0.29061900  |
| C                                                         | 4.41633000  | -0.78304000 | -0.31549700 | C  | 0.09858500  | -4.84948100 | -0.97643600 |
| C                                                         | 4.32812800  | -2.13328500 | 0.07223100  | H  | 1.17041600  | -5.05453300 | -0.88859100 |
| C                                                         | 5.67525200  | -0.24672000 | -0.65925100 | H  | -0.20425200 | -5.12050700 | -1.99109500 |
| C                                                         | 5.47441200  | -2.92338200 | 0.11390600  | H  | -0.45069600 | -5.44774800 | -0.24928100 |
| H                                                         | 3.36036200  | -2.54603300 | 0.33843500  | C  | -2.51844200 | 1.82735900  | 0.55035500  |
| C                                                         | 6.81366900  | -1.04526100 | -0.61066800 | C  | -2.15506000 | 2.35931200  | -0.87038500 |
| H                                                         | 5.74662400  | 0.79221700  | -0.96585100 | H  | -2.55535500 | 2.69461700  | 1.22600600  |
| C                                                         | 6.71795300  | -2.38523100 | -0.22480800 | C  | -0.64500000 | 2.69288200  | -1.04083400 |
| H                                                         | 5.39515700  | -3.96403000 | 0.41400300  | H  | -2.42874600 | 1.59097000  | -1.59565100 |
| H                                                         | 7.77764800  | -0.62202100 | -0.87766800 | H  | -0.57344000 | 3.71984100  | -1.42492100 |
| H                                                         | 7.60844600  | -3.00587000 | -0.18960400 | H  | -0.15732600 | 2.73719300  | -0.06585900 |
| C                                                         | 2.24019700  | 2.47110000  | -0.74159300 | C  | -3.92794900 | 1.21595900  | 0.57323400  |
| C                                                         | 3.26071900  | 3.42127600  | -0.52622600 | O  | -4.73699100 | 1.26771200  | -0.33162600 |
| C                                                         | 0.98498000  | 2.91388800  | -1.19367500 | O  | -4.19615300 | 0.64572500  | 1.76282200  |
| C                                                         | 3.02635500  | 4.77213000  | -0.76416200 | C  | -2.99384100 | 3.61505800  | -1.18004500 |
| H                                                         | 4.22902800  | 3.08709500  | -0.16710400 | H  | -2.73253100 | 4.43385800  | -0.49790400 |
| C                                                         | 0.76102500  | 4.26738900  | -1.43734300 | H  | -4.06246000 | 3.41451000  | -1.09315800 |
| H                                                         | 0.19799300  | 2.18733800  | -1.35869600 | H  | -2.79657200 | 3.95964600  | -2.20106800 |
| C                                                         | 1.77755200  | 5.20070000  | -1.22338400 | C  | -5.48219800 | 0.01364200  | 1.86161600  |
| H                                                         | 3.82092200  | 5.49264100  | -0.59274800 | H  | -5.54095900 | -0.37435000 | 2.87845500  |
| H                                                         | -0.21109300 | 4.59122700  | -1.79642400 | H  | -5.55735800 | -0.79938000 | 1.13557200  |
| H                                                         | 1.59995600  | 6.25503800  | -1.41412700 | H  | -6.28337700 | 0.73396500  | 1.67747600  |
|                                                           |             |             |             | C  | -2.75286900 | -0.97850800 | -1.91956500 |
|                                                           |             |             |             | O  | -1.72314100 | -0.61239000 | -2.54115100 |
| TS3-6                                                     |             |             |             | O  | -2.84296000 | -1.20399100 | -0.66273000 |
| Thermal correction to Gibbs Free Energy= 0.499273 Hartree |             |             |             | C  | -4.05081500 | -1.13882300 | -2.68609200 |
| SCF Done: E(RM06) = -2091.82455393 Hartree                |             |             |             | H  | -3.87738100 | -1.05237900 | -3.75883500 |
| 0 1                                                       |             |             |             | H  | -4.73924600 | -0.35686600 | -2.35088500 |
| C                                                         | 0.12581000  | 0.32320900  | 2.73406200  | H  | -4.50531700 | -2.10497300 | -2.45174300 |
| C                                                         | 0.97539200  | 0.60111900  | 3.80028700  |    |             |             |             |

|                                                           |             |             |             |    |             |             |             |
|-----------------------------------------------------------|-------------|-------------|-------------|----|-------------|-------------|-------------|
| Pd                                                        | 0.29527300  | -0.42297500 | -1.68175300 | O  | -1.69190100 | 1.80355400  | 3.38618900  |
| C                                                         | 0.14438400  | 1.83188300  | -2.02838800 | N  | -2.00742200 | 0.77214400  | 1.32824200  |
| H                                                         | -0.49067700 | 1.37598700  | -2.79719300 | Pd | -1.62668100 | -0.96944300 | 0.36184600  |
| H                                                         | 0.90751000  | 2.38864400  | -2.56400800 | C  | -0.19104200 | -3.10777100 | -1.27122500 |
| C                                                         | 2.14138500  | -0.08887500 | -0.99709600 | O  | 0.61850000  | -2.29788500 | -1.81324000 |
| C                                                         | 1.96537500  | 1.18211600  | -1.00568800 | O  | -1.11941300 | -2.84991400 | -0.44382500 |
| C                                                         | 3.17568400  | -1.03393800 | -0.57506200 | C  | -0.02430100 | -4.56373000 | -1.67289700 |
| C                                                         | 3.38303300  | -2.24572200 | -1.25614500 | H  | 1.03687700  | -4.81813900 | -1.71482600 |
| C                                                         | 4.00701300  | -0.71339800 | 0.51540500  | H  | -0.43870600 | -4.69713900 | -2.67750100 |
| C                                                         | 4.40759300  | -3.10597000 | -0.86225900 | H  | -0.55313700 | -5.22120200 | -0.98217500 |
| H                                                         | 2.72922400  | -2.50607200 | -2.07963200 | C  | -2.48477100 | 2.00308900  | 0.71027600  |
| C                                                         | 5.02391900  | -1.58153700 | 0.90711400  | C  | -1.49873400 | 2.60306400  | -0.34300900 |
| H                                                         | 3.85011100  | 0.22015800  | 1.04653200  | H  | -2.60143000 | 2.72272800  | 1.53307200  |
| C                                                         | 5.22948900  | -2.77990700 | 0.21873800  | C  | -0.02024900 | 2.45389900  | 0.08900900  |
| H                                                         | 4.56426500  | -4.03499900 | -1.40324700 | H  | -1.64649300 | 2.02572800  | -1.26249600 |
| H                                                         | 5.65973400  | -1.31969200 | 1.74834900  | H  | 0.27925400  | 3.32779200  | 0.67932500  |
| H                                                         | 6.02474800  | -3.45434800 | 0.52325600  | H  | 0.08682400  | 1.58886200  | 0.74275600  |
| C                                                         | 2.57277800  | 2.47541700  | -0.73672600 | C  | -3.88675400 | 1.80981500  | 0.11636200  |
| C                                                         | 2.39211400  | 3.12558300  | 0.49864900  | O  | -4.26291100 | 2.23270800  | -0.95952400 |
| C                                                         | 3.39460000  | 3.07379800  | -1.71214700 | O  | -4.68957000 | 1.15165700  | 0.97007900  |
| C                                                         | 3.03058400  | 4.34046100  | 0.74910600  | C  | -1.83548400 | 4.07201400  | -0.64994700 |
| H                                                         | 1.74389100  | 2.69317600  | 1.25326400  | H  | -1.74382500 | 4.68707800  | 0.25371300  |
| C                                                         | 4.03179000  | 4.28404300  | -1.45099500 | H  | -2.84862800 | 4.17287300  | -1.04092100 |
| H                                                         | 3.53567900  | 2.57296700  | -2.66524900 | H  | -1.14368600 | 4.47829700  | -1.39667800 |
| C                                                         | 3.85006900  | 4.92091400  | -0.22015700 | C  | -6.02086900 | 0.90256400  | 0.49424700  |
| H                                                         | 2.87957700  | 4.83503100  | 1.70395200  | H  | -6.54091900 | 0.41551400  | 1.31897700  |
| H                                                         | 4.67085700  | 4.73028400  | -2.20729000 | H  | -5.99121800 | 0.24642200  | -0.37910500 |
| H                                                         | 4.34375500  | 5.86741000  | -0.01987700 | H  | -6.51780400 | 1.83755900  | 0.22343200  |
|                                                           |             |             |             | C  | -2.58290800 | -0.36206900 | -2.42670500 |
|                                                           |             |             |             | O  | -1.42240700 | -0.26733900 | -2.89669300 |
|                                                           |             |             |             | O  | -2.89223500 | -0.56341200 | -1.20005900 |
|                                                           |             |             |             | C  | -3.76815500 | -0.19367000 | -3.35631300 |
|                                                           |             |             |             | H  | -3.43631400 | -0.11605200 | -4.39173700 |
|                                                           |             |             |             | H  | -4.30301000 | 0.71460500  | -3.06189400 |
|                                                           |             |             |             | H  | -4.45454300 | -1.03686300 | -3.24072800 |
|                                                           |             |             |             | Pd | 0.44424600  | -0.21458400 | -1.74152100 |
|                                                           |             |             |             | C  | 0.96446600  | 2.24810700  | -1.08819800 |
|                                                           |             |             |             | H  | 0.40705600  | 1.72890500  | -1.92431100 |
|                                                           |             |             |             | H  | 1.21136800  | 3.18786000  | -1.59695900 |
|                                                           |             |             |             | C  | 2.18491100  | 0.15467400  | -0.85787100 |
|                                                           |             |             |             | C  | 2.25928500  | 1.49577000  | -0.72298600 |
|                                                           |             |             |             | C  | 3.09266400  | -0.92021700 | -0.45158400 |
|                                                           |             |             |             | C  | 3.63158800  | -1.82433300 | -1.38674600 |
|                                                           |             |             |             | C  | 3.41834200  | -1.08721400 | 0.90943800  |
| 4-δ                                                       |             |             |             |    |             |             |             |
| Thermal correction to Gibbs Free Energy= 0.501213 Hartree |             |             |             |    |             |             |             |
| SCF Done: E(RM06) = -2091.87088831 Hartree                |             |             |             |    |             |             |             |
| 0 1                                                       |             |             |             |    |             |             |             |
| C                                                         | -0.92447300 | -0.42409800 | 3.08240500  |    |             |             |             |
| C                                                         | -0.46739700 | -0.57367500 | 4.38753100  |    |             |             |             |
| C                                                         | 0.18027100  | -1.75496000 | 4.74183700  |    |             |             |             |
| C                                                         | 0.35387200  | -2.75101100 | 3.77845500  |    |             |             |             |
| C                                                         | -0.12523900 | -2.53631600 | 2.48925300  |    |             |             |             |
| H                                                         | -0.63597700 | 0.24608500  | 5.07654500  |    |             |             |             |
| H                                                         | 0.54526800  | -1.90051500 | 5.75403100  |    |             |             |             |
| H                                                         | 0.85231100  | -3.68491000 | 4.01368800  |    |             |             |             |
| H                                                         | -0.03588500 | -3.27080400 | 1.69820100  |    |             |             |             |
| N                                                         | -0.74470900 | -1.39189500 | 2.16069100  |    |             |             |             |
| C                                                         | -1.60081500 | 0.83938600  | 2.61837400  |    |             |             |             |

|                                                           |             |             |             |                                                           |             |             |             |
|-----------------------------------------------------------|-------------|-------------|-------------|-----------------------------------------------------------|-------------|-------------|-------------|
| C                                                         | 4.48994200  | -2.84242600 | -0.97599500 | H                                                         | -3.86251900 | -3.82005400 | -1.22840500 |
| H                                                         | 3.37066600  | -1.71895500 | -2.43458300 | C                                                         | 2.49813000  | 1.01958000  | 0.04561700  |
| C                                                         | 4.27350400  | -2.10979700 | 1.31579600  | C                                                         | 2.50195900  | 0.97152200  | 1.60051100  |
| H                                                         | 3.00405000  | -0.39698600 | 1.63789300  | H                                                         | 3.07462900  | 1.91347900  | -0.22619900 |
| C                                                         | 4.81456800  | -2.99006600 | 0.37517400  | C                                                         | 3.92565200  | 1.03313700  | 2.20602500  |
| H                                                         | 4.90607900  | -3.52385800 | -1.71277200 | H                                                         | 1.98992400  | 1.89703500  | 1.88856800  |
| H                                                         | 4.52186800  | -2.21692900 | 2.36823900  | H                                                         | 3.80689900  | 1.07386100  | 3.29653500  |
| H                                                         | 5.48310000  | -3.78535000 | 0.69240800  | H                                                         | 4.45716300  | 0.10208700  | 1.98536600  |
| C                                                         | 3.43905400  | 2.28328900  | -0.28313900 | C                                                         | 3.22606200  | -0.12351200 | -0.65520700 |
| C                                                         | 3.28074900  | 3.55860600  | 0.29193500  | O                                                         | 3.77789400  | -1.06024300 | -0.10848200 |
| C                                                         | 4.75312100  | 1.81042900  | -0.47064200 | O                                                         | 3.26336800  | 0.08386700  | -1.98429500 |
| C                                                         | 4.38347000  | 4.31699900  | 0.68490500  | C                                                         | 3.91561300  | -0.93078700 | -2.76152300 |
| H                                                         | 2.28719900  | 3.96422600  | 0.44656300  | H                                                         | 3.97415300  | -0.53299000 | -3.77462100 |
| C                                                         | 5.85293200  | 2.56917700  | -0.07940100 | H                                                         | 3.32069500  | -1.84695600 | -2.74884900 |
| H                                                         | 4.91160000  | 0.84773300  | -0.94188000 | H                                                         | 4.91422400  | -1.13833200 | -2.36982700 |
| C                                                         | 5.67622000  | 3.82583800  | 0.50499700  | C                                                         | 1.04365100  | -2.69796300 | -0.27539300 |
| H                                                         | 4.22776600  | 5.29426000  | 1.13330100  | O                                                         | 0.36836400  | -2.76715500 | 0.79999500  |
| H                                                         | 6.85442900  | 2.18074800  | -0.24253100 | O                                                         | 0.99252800  | -1.76514000 | -1.13090500 |
| H                                                         | 6.53567100  | 4.41675500  | 0.80801800  | C                                                         | 2.02535900  | -3.81568200 | -0.53472200 |
|                                                           |             |             |             | H                                                         | 3.03014800  | -3.41293200 | -0.37327100 |
|                                                           |             |             |             | H                                                         | 1.95038300  | -4.13894400 | -1.57587600 |
| TS4                                                       |             |             |             | H                                                         | 1.84632900  | -4.65349000 | 0.13896400  |
| Thermal correction to Gibbs Free Energy= 0.373871 Hartree |             |             |             | Pd                                                        | -1.01174100 | -1.39121500 | 1.39568100  |
| SCF Done: E(RM06) = -1781.66927153 Hartree                |             |             |             | C                                                         | -2.21543900 | 0.96049600  | 2.36623100  |
| 0 1                                                       |             |             |             | O                                                         | -2.48594500 | -0.31158700 | 2.18399500  |
| C                                                         | -0.65645400 | 2.72677900  | -0.97619600 | C                                                         | -3.34533400 | 1.71765000  | 3.04232700  |
| C                                                         | -1.24978500 | 3.98144400  | -1.06408100 | H                                                         | -3.09574300 | 2.77808300  | 3.09416800  |
| C                                                         | -2.56855000 | 4.07065800  | -1.50059800 | H                                                         | -3.49774500 | 1.32685800  | 4.05310000  |
| C                                                         | -3.25521300 | 2.90161700  | -1.83881600 | H                                                         | -4.28103500 | 1.57463800  | 2.49453600  |
| C                                                         | -2.60274100 | 1.67797100  | -1.72713300 | O                                                         | -1.15654400 | 1.49214400  | 2.03630900  |
| H                                                         | -0.65205100 | 4.84063900  | -0.78218700 | C                                                         | 4.76881400  | 2.23652700  | 1.76266800  |
| H                                                         | -3.05862600 | 5.03636200  | -1.57868100 | H                                                         | 4.21634200  | 3.17584000  | 1.87510000  |
| H                                                         | -4.28225400 | 2.92924300  | -2.18584300 | H                                                         | 5.08258600  | 2.16170900  | 0.71616900  |
| H                                                         | -3.07035900 | 0.73348000  | -1.97797400 | H                                                         | 5.68073900  | 2.30748400  | 2.36485100  |
| N                                                         | -1.33136300 | 1.61014500  | -1.30165500 | C                                                         | 1.72228000  | -0.19599800 | 2.22456100  |
| C                                                         | 0.75957300  | 2.54593300  | -0.51218900 | H                                                         | 0.65439400  | -0.10600900 | 1.93032300  |
| O                                                         | 1.42841700  | 3.52677000  | -0.17029600 | H                                                         | 2.12154300  | -1.16717500 | 1.93249400  |
| N                                                         | 1.16606100  | 1.25241600  | -0.52186300 | H                                                         | 1.74169900  | -0.12254200 | 3.31656100  |
| Pd                                                        | -0.24165200 | -0.09399000 | -1.09590100 |                                                           |             |             |             |
| C                                                         | -2.54922200 | -2.12163600 | -1.01133500 | 7                                                         |             |             |             |
| O                                                         | -2.43798000 | -2.37122900 | 0.22926400  | Thermal correction to Gibbs Free Energy= 0.375363 Hartree |             |             |             |
| O                                                         | -1.86991600 | -1.31125500 | -1.71023700 | SCF Done: E(RM06) = -1781.68740391 Hartree                |             |             |             |
| C                                                         | -3.66338400 | -2.86956500 | -1.72427900 | 0 1                                                       |             |             |             |
| H                                                         | -3.40101600 | -3.02505400 | -2.77174200 | C                                                         | -1.14051400 | 2.57021100  | -1.12050300 |
| H                                                         | -4.57461300 | -2.26322200 | -1.68009700 |                                                           |             |             |             |



|                                                           |             |             |             |    |             |             |             |
|-----------------------------------------------------------|-------------|-------------|-------------|----|-------------|-------------|-------------|
| H                                                         | -4.29062400 | -1.62174800 | 0.39666900  | H  | 5.21139700  | 1.14063700  | 2.34165900  |
| H                                                         | -3.66857800 | -2.94850700 | -0.57066900 | H  | 3.37992500  | -0.54361000 | 1.96480500  |
| C                                                         | -2.68607100 | -0.10974800 | -1.63014500 | N  | 1.98348500  | 0.88955300  | 1.46743400  |
| O                                                         | -3.57799500 | 0.43812900  | -1.00925100 | C  | 0.27075500  | 2.50548400  | 0.87191000  |
| O                                                         | -2.40537100 | 0.16085300  | -2.91671300 | O  | -0.03475100 | 3.66594300  | 0.56979200  |
| C                                                         | -3.15695200 | 1.22824700  | -3.51341900 | N  | -0.53057400 | 1.41500400  | 0.84781800  |
| H                                                         | -2.90169300 | 1.21062100  | -4.57288900 | Pd | 0.37655300  | -0.35234000 | 1.23046700  |
| H                                                         | -2.86165200 | 2.18158700  | -3.06914100 | C  | 1.93116900  | -2.66074900 | 0.28851000  |
| H                                                         | -4.22933700 | 1.07505500  | -3.37151000 | O  | 1.65951900  | -2.27363800 | -0.89190900 |
| C                                                         | -1.53912400 | 2.53468600  | 0.07662000  | O  | 1.54475000  | -2.10620000 | 1.36578900  |
| O                                                         | -1.38045800 | 2.16672200  | 1.28240600  | C  | 2.77881900  | -3.91045100 | 0.43329600  |
| O                                                         | -0.94725800 | 2.06232200  | -0.93940000 | H  | 2.19518700  | -4.76707200 | 0.08101400  |
| C                                                         | -2.58009700 | 3.60320800  | -0.17103300 | H  | 3.07290700  | -4.07541400 | 1.46999200  |
| H                                                         | -3.50180400 | 3.09259500  | -0.46920600 | H  | 3.66155000  | -3.83644800 | -0.20780600 |
| H                                                         | -2.26547900 | 4.25813200  | -0.98576800 | C  | -1.86452000 | 1.61677900  | 0.28167000  |
| H                                                         | -2.76733500 | 4.17749700  | 0.73667700  | C  | -1.91556400 | 1.50221700  | -1.27500000 |
| Pd                                                        | -0.11728400 | 0.60762900  | 1.76533700  | H  | -2.10059700 | 2.66789500  | 0.50064900  |
| C                                                         | 0.83870500  | -1.85025800 | 2.88385900  | C  | -3.15510000 | 2.28499500  | -1.80444400 |
| O                                                         | 1.28423400  | -0.77563400 | 2.36546600  | H  | -1.02918400 | 2.05311600  | -1.61322900 |
| C                                                         | 1.84415100  | -2.83078600 | 3.44127000  | H  | -4.06449600 | 1.73567500  | -1.53841700 |
| H                                                         | 1.63945000  | -2.98442700 | 4.50451000  | H  | -3.19775500 | 3.24336200  | -1.27010100 |
| H                                                         | 2.86213300  | -2.46635800 | 3.30793200  | C  | -2.93016800 | 0.83003100  | 1.04146700  |
| H                                                         | 1.71878200  | -3.79500800 | 2.94093200  | O  | -3.82872600 | 0.18021900  | 0.54182100  |
| O                                                         | -0.39067100 | -2.13078200 | 2.95150200  | O  | -2.80872700 | 1.02673000  | 2.36722000  |
| C                                                         | -3.71150400 | -3.38228200 | 1.53033300  | C  | -3.74438600 | 0.31841500  | 3.19216600  |
| H                                                         | -3.61126700 | -2.89919100 | 2.50784000  | H  | -3.58828600 | 0.69425600  | 4.20344000  |
| H                                                         | -2.97361400 | -4.19081300 | 1.48767500  | H  | -3.53589600 | -0.75326000 | 3.15099900  |
| H                                                         | -4.70788700 | -3.83516300 | 1.49227300  | H  | -4.77033700 | 0.50354600  | 2.86505400  |
| C                                                         | -2.00428300 | -0.68503400 | 1.46656100  | C  | -1.83373800 | -2.31295800 | 0.60213300  |
| H                                                         | -1.01855300 | -1.15041800 | 2.26034800  | O  | -1.50212100 | -2.41158200 | -0.61349300 |
| H                                                         | -2.44635200 | 0.26201500  | 1.17460400  | O  | -1.34346600 | -1.51033600 | 1.45779400  |
| H                                                         | -2.62008100 | -0.99279900 | 2.32316700  | C  | -2.96224700 | -3.20050300 | 1.08323200  |
|                                                           |             |             |             | H  | -3.88165400 | -2.60659700 | 1.04308600  |
| 8                                                         |             |             |             | H  | -2.79450700 | -3.51099800 | 2.11625700  |
| Thermal correction to Gibbs Free Energy= 0.377504 Hartree |             |             |             | H  | -3.07287100 | -4.06787300 | 0.43162100  |
| SCF Done: E(RM06) = -1781.71793713 Hartree                |             |             |             | Pd | -0.24456600 | -1.01759800 | -1.50573500 |
| 0 1                                                       |             |             |             | C  | 2.14609900  | 0.32957800  | -2.85597600 |
| C                                                         | 1.67970000  | 2.19139400  | 1.29782700  | O  | 0.92357600  | 0.36754500  | -2.65875700 |
| C                                                         | 2.63495000  | 3.18649000  | 1.48041000  | C  | 2.82404800  | 1.35736200  | -3.72037200 |
| C                                                         | 3.92360900  | 2.81954800  | 1.86066600  | H  | 3.68495400  | 1.77792300  | -3.19412900 |
| C                                                         | 4.22115800  | 1.46645900  | 2.04265500  | H  | 2.11951900  | 2.14326600  | -3.98828800 |
| C                                                         | 3.22094700  | 0.52105500  | 1.83617100  | H  | 3.19971500  | 0.87239100  | -4.62701300 |
| H                                                         | 2.32861900  | 4.21353100  | 1.31695600  | O  | 2.95955000  | -0.57831300 | -2.36731900 |
| H                                                         | 4.68811600  | 3.57480100  | 2.01593600  | C  | -3.13712400 | 2.57619400  | -3.30922500 |

|                                                           |             |             |             |       |             |             |             |
|-----------------------------------------------------------|-------------|-------------|-------------|-------|-------------|-------------|-------------|
| H                                                         | -3.21739000 | 1.66564700  | -3.91051600 | O     | 1.22118700  | 2.12567300  | -1.49879100 |
| H                                                         | -2.21428700 | 3.09065600  | -3.60209700 | O     | -0.98716300 | 2.53888200  | -1.29065400 |
| H                                                         | -3.97748300 | 3.22257300  | -3.58413100 | C     | 0.41281800  | 4.31310800  | -1.99460600 |
| C                                                         | -1.88616600 | 0.10475600  | -1.89731400 | H     | 0.43446800  | 4.91706400  | -1.08111300 |
| H                                                         | 2.47469000  | -1.25905800 | -1.80298000 | H     | -0.41839400 | 4.65490500  | -2.61455500 |
| H                                                         | -2.73284900 | -0.50620800 | -1.58430000 | H     | 1.36006300  | 4.43111400  | -2.52175000 |
| H                                                         | -1.85103400 | 0.17298900  | -2.98911400 | Pd    | 1.17862400  | 0.20013100  | -0.47621100 |
|                                                           |             |             |             | C     | 1.43267400  | 1.24431000  | 1.26998100  |
| 3-y                                                       |             |             |             | H     | 1.54304700  | 2.26654900  | 0.90876400  |
| Thermal correction to Gibbs Free Energy= 0.496052 Hartree |             |             |             | C     | 2.76085200  | -1.13026800 | 0.15654100  |
| SCF Done: E(RM06) = -2091.85722476 Hartree                |             |             |             | C     | 1.69372000  | -1.74491000 | 0.38769700  |
| O 1                                                       |             |             |             | C     | 0.79059200  | -2.82328500 | 0.70544000  |
| C                                                         | -3.01597900 | -1.30761000 | 0.63032500  | C     | 0.57916000  | -3.20605900 | 2.04249500  |
| C                                                         | -3.83407700 | -2.36508300 | 1.01403300  | C     | 0.14968100  | -3.53401900 | -0.32752300 |
| C                                                         | -4.33132200 | -3.21899900 | 0.03263700  | C     | -0.24565200 | -4.28991100 | 2.33786400  |
| C                                                         | -3.98855600 | -2.99656600 | -1.30322700 | H     | 1.06643400  | -2.65304600 | 2.83890100  |
| C                                                         | -3.15500100 | -1.92727400 | -1.61780300 | C     | -0.66466700 | -4.62131500 | -0.02098600 |
| H                                                         | -4.05343800 | -2.47516000 | 2.06976300  | H     | 0.30742500  | -3.21921600 | -1.35374100 |
| H                                                         | -4.98038000 | -4.04700200 | 0.30145600  | C     | -0.86465800 | -5.00284700 | 1.30923600  |
| H                                                         | -4.35960500 | -3.63665800 | -2.09626900 | H     | -0.40307000 | -4.57738300 | 3.37310600  |
| H                                                         | -2.85224500 | -1.68761200 | -2.63080800 | H     | -1.14435100 | -5.17474900 | -0.82317200 |
| N                                                         | -2.68525400 | -1.11257300 | -0.66056000 | H     | -1.50010700 | -5.85233800 | 1.54262300  |
| C                                                         | -2.44886300 | -0.33213300 | 1.62682600  | C     | 4.17072900  | -0.84147300 | 0.10032900  |
| O                                                         | -2.59231300 | -0.53678500 | 2.83920200  | C     | 4.67625200  | 0.21168300  | -0.68329300 |
| N                                                         | -1.80241400 | 0.70406100  | 1.04330000  | C     | 5.06540400  | -1.64006100 | 0.84130800  |
| Pd                                                        | -1.62967700 | 0.60803900  | -0.97838100 | C     | 6.04745400  | 0.45377300  | -0.72692700 |
| C                                                         | -0.22530400 | -0.42105700 | -3.31110300 | H     | 3.98423600  | 0.83048300  | -1.24573700 |
| O                                                         | 0.68998400  | -0.76995000 | -2.52988400 | C     | 6.43380400  | -1.39112100 | 0.78833100  |
| O                                                         | -1.32215100 | 0.17926500  | -2.99815400 | H     | 4.67643500  | -2.45046000 | 1.44980500  |
| C                                                         | -0.05184400 | -0.70394500 | -4.79581000 | C     | 6.92894000  | -0.34445600 | 0.00559800  |
| H                                                         | -1.01327200 | -0.74001000 | -5.31076200 | H     | 6.42787600  | 1.26968200  | -1.33424600 |
| H                                                         | 0.49989800  | -1.63527900 | -4.93791500 | H     | 7.11522800  | -2.01302500 | 1.36154700  |
| H                                                         | 0.54211900  | 0.10620200  | -5.23286700 | H     | 7.99704700  | -0.15101200 | -0.03036700 |
| C                                                         | -1.09788900 | 1.60412200  | 1.95445200  | H     | 2.38003600  | 0.90012500  | 1.69116300  |
| C                                                         | 0.33053800  | 1.10862000  | 2.32493500  | H     | 0.19219600  | 0.04488800  | 2.55785400  |
| H                                                         | -1.67815300 | 1.56739500  | 2.88514200  | C     | 0.85224700  | 1.77909700  | 3.63248300  |
| C                                                         | -1.19379100 | 3.06016200  | 1.50482400  | H     | 1.83760500  | 1.34690600  | 3.84678100  |
| O                                                         | -0.27306900 | 3.85413300  | 1.45616700  | H     | 1.01570600  | 2.84551500  | 3.44636300  |
| O                                                         | -2.47208800 | 3.39372400  | 1.25174600  | C     | -0.04166900 | 1.58742400  | 4.86629000  |
| C                                                         | -2.68791500 | 4.73378900  | 0.78689700  | H     | -0.33446200 | 0.53945300  | 4.99167700  |
| H                                                         | -3.76976800 | 4.86366400  | 0.75619500  | H     | 0.48947200  | 1.90227100  | 5.77096500  |
| H                                                         | -2.26422800 | 4.84964800  | -0.21333100 | H     | -0.96090100 | 2.17897300  | 4.81304300  |
| H                                                         | -2.23064800 | 5.45930900  | 1.46398600  |       |             |             |             |
| C                                                         | 0.21245000  | 2.87014000  | -1.57849100 | TS3-y |             |             |             |



|                                                           |             |             |             |                                                           |            |             |             |
|-----------------------------------------------------------|-------------|-------------|-------------|-----------------------------------------------------------|------------|-------------|-------------|
| Thermal correction to Gibbs Free Energy= 0.499426 Hartree |             |             |             | C                                                         | 1.31924900 | 2.57781900  | 0.29141900  |
| SCF Done: E(RM06) = -2091.82589574 Hartree                |             |             |             | C                                                         | 1.73396100 | 3.16888000  | -0.92069600 |
| 0 1                                                       |             |             |             | C                                                         | 0.69266900 | 3.38258700  | 1.26480700  |
| C                                                         | -1.76014300 | 1.54656100  | -2.16045500 | C                                                         | 1.55461600 | 4.53309200  | -1.13708700 |
| C                                                         | -1.88344400 | 2.66409800  | -2.97943600 | H                                                         | 2.17102800 | 2.54510200  | -1.69373700 |
| C                                                         | -2.66474000 | 3.73197500  | -2.54509300 | C                                                         | 0.52597600 | 4.74672200  | 1.04108500  |
| C                                                         | -3.29536600 | 3.65309800  | -1.30129400 | H                                                         | 0.34358500 | 2.92019800  | 2.18121500  |
| C                                                         | -3.12326900 | 2.50939400  | -0.52723400 | C                                                         | 0.95774200 | 5.32767700  | -0.15533300 |
| H                                                         | -1.36074700 | 2.65300000  | -3.92898200 | H                                                         | 1.88008400 | 4.97537800  | -2.07431000 |
| H                                                         | -2.78315300 | 4.61545000  | -3.16507800 | H                                                         | 0.05671600 | 5.36129700  | 1.80419100  |
| H                                                         | -3.91273400 | 4.46287700  | -0.92823400 | H                                                         | 0.82442100 | 6.39255800  | -0.32351200 |
| H                                                         | -3.58172900 | 2.37756300  | 0.44608900  | C                                                         | 3.85820900 | 0.03791400  | 0.46173600  |
| N                                                         | -2.36777400 | 1.48805900  | -0.96010600 | C                                                         | 4.46974500 | -0.84737100 | 1.36792300  |
| C                                                         | -0.93185700 | 0.35479400  | -2.55468500 | C                                                         | 4.67329000 | 0.81063900  | -0.38483300 |
| O                                                         | -0.24796000 | 0.39276900  | -3.58720900 | C                                                         | 5.85801400 | -0.95341600 | 1.42454200  |
| N                                                         | -1.02440300 | -0.67125300 | -1.67775100 | H                                                         | 3.85037000 | -1.43544500 | 2.03902000  |
| Pd                                                        | -2.09428400 | -0.28292600 | 0.01666800  | C                                                         | 6.06152400 | 0.70102300  | -0.32066400 |
| C                                                         | -2.20751000 | 0.89218200  | 2.67131000  | H                                                         | 4.21475700 | 1.49541300  | -1.08969500 |
| O                                                         | -0.95089700 | 0.95054200  | 2.63225600  | C                                                         | 6.65984900 | -0.18241400 | 0.57964300  |
| O                                                         | -2.98743200 | 0.42992700  | 1.76537800  | H                                                         | 6.31370500 | -1.63694300 | 2.13506000  |
| C                                                         | -2.89282400 | 1.40532500  | 3.92682400  | H                                                         | 6.67626400 | 1.30404000  | -0.98279100 |
| H                                                         | -2.34539700 | 2.25772000  | 4.33381300  | H                                                         | 7.74138200 | -0.26950700 | 0.62303900  |
| H                                                         | -2.87493300 | 0.60798600  | 4.67763600  | C                                                         | 1.60950000 | -1.63491400 | -0.02727800 |
| H                                                         | -3.93260100 | 1.67064100  | 3.72986300  | H                                                         | 2.60037200 | -2.01586700 | 0.19485900  |
| C                                                         | -0.16018500 | -1.81192700 | -1.96801600 | H                                                         | 0.92297600 | -2.29460200 | 0.50604300  |
| C                                                         | 1.32642000  | -1.62393400 | -1.53748300 | C                                                         | 2.20901800 | -2.69870100 | -2.23712600 |
| H                                                         | -0.12693100 | -1.87898000 | -3.06453700 | H                                                         | 2.09274900 | -3.65392800 | -1.71541800 |
| C                                                         | -0.79610600 | -3.12616800 | -1.51623500 | H                                                         | 1.81130200 | -2.85139800 | -3.24863600 |
| O                                                         | -0.26063700 | -3.97523600 | -0.82825000 | C                                                         | 3.69203300 | -2.33390600 | -2.35669600 |
| O                                                         | -2.01858800 | -3.26711400 | -2.05364500 | H                                                         | 4.23286500 | -3.11558600 | -2.90075300 |
| C                                                         | -2.74682300 | -4.44032600 | -1.65941500 | H                                                         | 3.82655200 | -1.39418700 | -2.90372000 |
| H                                                         | -3.64203600 | -4.45249800 | -2.28110100 | H                                                         | 4.17828500 | -2.22009600 | -1.38322800 |
| H                                                         | -3.01698400 | -4.36399400 | -0.60415700 | H                                                         | 1.60873900 | -0.65580300 | -1.96393600 |
| H                                                         | -2.15016300 | -5.34077600 | -1.82340600 |                                                           |            |             |             |
| C                                                         | -1.44110800 | -2.60575000 | 1.81883900  |                                                           |            |             |             |
| O                                                         | -0.46654100 | -2.01932500 | 2.35275800  | 4-γ                                                       |            |             |             |
| O                                                         | -2.12744500 | -2.18798000 | 0.82078000  | Thermal correction to Gibbs Free Energy= 0.502076 Hartree |            |             |             |
| C                                                         | -1.83515300 | -3.97297200 | 2.34374000  | SCF Done: E(RM06) = -2091.86330786 Hartree                |            |             |             |
| H                                                         | -1.42605100 | -4.13033400 | 3.34226100  |                                                           |            |             |             |
| H                                                         | -1.41784300 | -4.72234500 | 1.66276500  | 0 1                                                       |            |             |             |
| H                                                         | -2.92161500 | -4.08454100 | 2.35122200  | C                                                         | 0.34206200 | -0.18791000 | 2.92321400  |
| Pd                                                        | 0.43944800  | -0.25034200 | 1.38754100  | C                                                         | 1.22754100 | -0.27450500 | 3.99307300  |
| C                                                         | 2.40579500  | 0.20193300  | 0.42608900  | C                                                         | 1.61706400 | -1.53405500 | 4.44231100  |
| C                                                         | 1.54599400  | 1.16968900  | 0.52160300  | C                                                         | 1.11114800 | -2.66944000 | 3.80569000  |

|    |             |             |             |                                                           |             |             |             |
|----|-------------|-------------|-------------|-----------------------------------------------------------|-------------|-------------|-------------|
| C  | 0.23234900  | -2.51164000 | 2.73807600  | C                                                         | 3.95134600  | -3.02040400 | -1.73209500 |
| H  | 1.57652700  | 0.65217400  | 4.43413300  | H                                                         | 2.36144700  | -2.10678700 | -2.86078200 |
| H  | 2.30398000  | -1.63273100 | 5.27733900  | C                                                         | 4.67259100  | -3.01939400 | -0.53528900 |
| H  | 1.38845900  | -3.66787300 | 4.12522500  | H                                                         | 4.91732100  | -2.08093900 | 1.39140900  |
| H  | -0.20447000 | -3.34715700 | 2.20462000  | H                                                         | 4.18685400  | -3.74226200 | -2.50905800 |
| N  | -0.13183300 | -1.29093800 | 2.31483900  | H                                                         | 5.47088000  | -3.73930000 | -0.37804400 |
| C  | -0.11118500 | 1.13472700  | 2.37342100  | C                                                         | 2.75941500  | 1.98742200  | -0.83603200 |
| O  | 0.38658300  | 2.18147100  | 2.81819100  | C                                                         | 3.58074700  | 2.29115400  | -1.93382500 |
| N  | -1.02654000 | 1.02962300  | 1.38508400  | C                                                         | 3.11745200  | 2.48481700  | 0.42855200  |
| Pd | -1.49454700 | -0.90149400 | 0.84295900  | C                                                         | 4.72934600  | 3.06708500  | -1.77581600 |
| C  | -0.90583400 | -3.43125500 | -0.62167600 | H                                                         | 3.31528600  | 1.90814400  | -2.91543000 |
| O  | -0.13856000 | -2.82286900 | -1.41929700 | C                                                         | 4.26606000  | 3.26390600  | 0.58369500  |
| O  | -1.60829200 | -2.93462600 | 0.32313400  | H                                                         | 2.49704600  | 2.26757200  | 1.29356500  |
| C  | -1.01912800 | -4.93415200 | -0.81414600 | C                                                         | 5.07499300  | 3.55701600  | -0.51513600 |
| H  | -1.38883500 | -5.41954000 | 0.09003100  | H                                                         | 5.35416800  | 3.28677700  | -2.63711000 |
| H  | -0.05314000 | -5.34726700 | -1.11042700 | H                                                         | 4.52714100  | 3.64128700  | 1.56855100  |
| H  | -1.72829900 | -5.12315400 | -1.62700900 | H                                                         | 5.96867300  | 4.16195900  | -0.39029300 |
| C  | -1.38100100 | 2.30766300  | 0.75084100  | H                                                         | 0.37549800  | 2.52971300  | -2.22834800 |
| C  | -0.27315000 | 2.88025600  | -0.18326300 | H                                                         | 0.57024600  | 3.04226200  | 0.49228400  |
| H  | -1.47161500 | 3.02715500  | 1.57293900  | C                                                         | -0.63790900 | 4.26843000  | -0.76347500 |
| C  | -2.77167400 | 2.24621700  | 0.12249400  | H                                                         | 0.25055000  | 4.63186400  | -1.29527700 |
| O  | -3.02419400 | 2.32998300  | -1.06363400 | H                                                         | -1.42891900 | 4.15666500  | -1.51176900 |
| O  | -3.70573900 | 2.16485700  | 1.08618200  | C                                                         | -1.04590200 | 5.32031400  | 0.27620300  |
| C  | -5.06902600 | 2.06164800  | 0.64783500  | H                                                         | -0.30412200 | 5.39864700  | 1.07901000  |
| H  | -5.67749100 | 2.21000200  | 1.54009200  | H                                                         | -1.13524700 | 6.30540500  | -0.19333600 |
| H  | -5.24228900 | 1.06851700  | 0.22986700  | H                                                         | -2.01307500 | 5.09695900  | 0.73855400  |
| H  | -5.29205000 | 2.82328600  | -0.10293700 |                                                           |             |             |             |
| C  | -3.28234400 | -0.74707400 | -1.57899500 | TS5                                                       |             |             |             |
| O  | -2.35149500 | -0.99535500 | -2.38236200 | Thermal correction to Gibbs Free Energy= 0.376646 Hartree |             |             |             |
| O  | -3.16534200 | -0.53363900 | -0.31870700 | SCF Done: E(RM06) = -1781.68711396 Hartree                |             |             |             |
| C  | -4.69135800 | -0.63532400 | -2.12763500 | O 1                                                       |             |             |             |
| H  | -4.89718500 | 0.42597700  | -2.30163200 | C                                                         | -1.31980100 | 2.70965400  | -0.55749900 |
| H  | -5.42086000 | -1.01679900 | -1.41016300 | C                                                         | -2.25149900 | 3.74155700  | -0.52094300 |
| H  | -4.77006900 | -1.16922200 | -3.07543300 | C                                                         | -3.52485400 | 3.51483200  | -1.03604000 |
| Pd | -0.27835100 | -0.71583000 | -1.73250100 | C                                                         | -3.82703700 | 2.26370200  | -1.57928000 |
| C  | 0.21635100  | 1.93479900  | -1.32055800 | C                                                         | -2.84634500 | 1.27679800  | -1.59041700 |
| H  | -0.64468200 | 1.27856700  | -1.60562600 | H                                                         | -1.93973900 | 4.68451300  | -0.08668300 |
| C  | 1.52261400  | 1.16536100  | -1.05033300 | H                                                         | -4.27390600 | 4.30060800  | -1.01856700 |
| C  | 1.53437400  | -0.17414800 | -1.16992000 | H                                                         | -4.80581500 | 2.04836800  | -1.99356600 |
| C  | 2.61087600  | -1.14428000 | -0.94863400 | H                                                         | -3.00573800 | 0.29135500  | -2.01068600 |
| C  | 3.33821100  | -1.16272100 | 0.25745600  | N                                                         | -1.62625400 | 1.50969800  | -1.08219800 |
| C  | 2.92747100  | -2.09842200 | -1.93464400 | C                                                         | 0.06843000  | 2.87304100  | -0.00594200 |
| C  | 4.36066500  | -2.08849500 | 0.45817900  | O                                                         | 0.41472300  | 3.96100300  | 0.46481400  |
| H  | 3.10151500  | -0.43796000 | 1.02905000  | N                                                         | 0.80672200  | 1.73741300  | -0.07851900 |

|    |             |             |             |                                          |                        |             |             |
|----|-------------|-------------|-------------|------------------------------------------|------------------------|-------------|-------------|
| Pd | -0.06775500 | 0.20377900  | -1.07935700 | H                                        | 3.24114500             | 1.34742500  | 2.30179600  |
| C  | -1.61146100 | -2.38525300 | -1.75540100 |                                          |                        |             |             |
| O  | -1.49655700 | -2.90926000 | -0.60339600 |                                          |                        |             |             |
| O  | -1.18185000 | -1.26001900 | -2.14846600 | 9                                        |                        |             |             |
| C  | -2.39665500 | -3.20842500 | -2.76302700 | Thermal correction to Gibbs Free Energy= | 0.374375 Hartree       |             |             |
| H  | -2.07752700 | -2.96608400 | -3.77751900 | SCF Done: E(RM06) =                      | -1781.68874036 Hartree |             |             |
| H  | -3.45953900 | -2.96349500 | -2.66194300 | 0 1                                      |                        |             |             |
| H  | -2.27456300 | -4.27324700 | -2.56137200 | C                                        | -1.59016200            | 2.65638500  | -0.32970300 |
| C  | 2.12232200  | 1.77361700  | 0.56059300  | C                                        | -2.60707100            | 3.59760900  | -0.21621500 |
| C  | 2.17848100  | 1.26333200  | 2.03170600  | C                                        | -3.84541400            | 3.31997700  | -0.78890400 |
| H  | 2.38182100  | 2.84144900  | 0.60913500  | C                                        | -4.02801400            | 2.10981600  | -1.46152300 |
| C  | 3.21544600  | 1.17510600  | -0.32535300 | C                                        | -2.96595500            | 1.21422400  | -1.54190100 |
| O  | 4.08930400  | 0.41654300  | 0.04971100  | H                                        | -2.38853500            | 4.51243800  | 0.32251000  |
| O  | 3.15347400  | 1.67882100  | -1.57129200 | H                                        | -4.65939000            | 4.03460900  | -0.71420800 |
| C  | 4.13869000  | 1.19099700  | -2.49290800 | H                                        | -4.97668900            | 1.85592100  | -1.92154500 |
| H  | 4.02508500  | 1.79558600  | -3.39269200 | H                                        | -3.03337600            | 0.26506100  | -2.05953700 |
| H  | 3.94821200  | 0.13890800  | -2.71797100 | N                                        | -1.78124000            | 1.49580200  | -0.98143100 |
| H  | 5.14440500  | 1.29832300  | -2.07969000 | C                                        | -0.23840500            | 2.86875400  | 0.29077000  |
| C  | 1.95450500  | -2.01776500 | -0.76116500 | O                                        | -0.00230300            | 3.91029200  | 0.91146100  |
| O  | 1.27176300  | -2.60504300 | 0.13684700  | N                                        | 0.59977200             | 1.81704000  | 0.10837000  |
| O  | 1.65623200  | -0.92709100 | -1.33062100 | Pd                                       | -0.11372900            | 0.33530600  | -1.07307000 |
| C  | 3.26409600  | -2.65890700 | -1.15480100 | C                                        | -1.43835900            | -2.31613300 | -1.90959000 |
| H  | 4.06981300  | -2.00595400 | -0.80416500 | O                                        | -1.24316300            | -2.90722200 | -0.79991600 |
| H  | 3.33002400  | -2.72213800 | -2.24405400 | O                                        | -1.08993700            | -1.14644100 | -2.24736900 |
| H  | 3.36232200  | -3.64908500 | -0.71040600 | C                                        | -2.22146000            | -3.12226600 | -2.93272100 |
| Pd | -0.47866900 | -1.89957900 | 0.91031200  | H                                        | -2.04651500            | -2.73306200 | -3.93623600 |
| C  | -2.39487200 | -0.34927300 | 2.26493600  | H                                        | -3.28889200            | -3.04194500 | -2.70065700 |
| O  | -2.22987700 | -1.56357400 | 1.79600700  | H                                        | -1.94568000            | -4.17625400 | -2.87279700 |
| C  | -3.71535900 | -0.16210000 | 2.99081900  | C                                        | 1.87182000             | 1.86257200  | 0.82529200  |
| H  | -3.80828800 | 0.87295500  | 3.32167600  | C                                        | 1.90081600             | 1.14287000  | 2.20792200  |
| H  | -3.76151400 | -0.83150200 | 3.85510400  | H                                        | 2.02725300             | 2.92766500  | 1.05202900  |
| H  | -4.54903200 | -0.42400900 | 2.33287800  | C                                        | 3.05881100             | 1.50184800  | -0.06832300 |
| O  | -1.56573300 | 0.55091500  | 2.13773900  | O                                        | 3.96760300             | 0.75156400  | 0.23570600  |
| C  | 1.81989500  | -0.22403800 | 2.22749500  | O                                        | 3.02501000             | 2.20430200  | -1.21338900 |
| H  | 0.74667200  | -0.35157400 | 1.94559100  | C                                        | 4.09217000             | 1.95143100  | -2.13817200 |
| H  | 2.42718100  | -0.82509600 | 1.55174100  | H                                        | 3.98843700             | 2.70361000  | -2.92010100 |
| C  | 2.01412600  | -0.74012700 | 3.65823100  | H                                        | 3.98628400             | 0.94987100  | -2.56181400 |
| H  | 1.86749800  | -1.82473600 | 3.70173800  | H                                        | 5.06310300             | 2.03776900  | -1.64477900 |
| H  | 3.03091400  | -0.53089600 | 4.01035000  | C                                        | 2.15748900             | -1.66720900 | -1.11997100 |
| H  | 1.31347500  | -0.28126800 | 4.36094500  | O                                        | 1.57677300             | -2.45655000 | -0.30949800 |
| C  | 1.37024200  | 2.18370900  | 2.96178700  | O                                        | 1.73257400             | -0.53373700 | -1.48552600 |
| H  | 1.60051300  | 1.96794200  | 4.00933300  | C                                        | 3.50127000             | -2.10402300 | -1.65484700 |
| H  | 1.60109400  | 3.23546100  | 2.77541100  | H                                        | 4.26352200             | -1.48171000 | -1.17458300 |
| H  | 0.29581000  | 2.04214100  | 2.81721900  | H                                        | 3.54703100             | -1.92680600 | -2.73207400 |
|    |             |             |             | H                                        | 3.68671400             | -3.15470800 | -1.43236000 |

|                                                           |             |             |             |                                                           |             |             |             |
|-----------------------------------------------------------|-------------|-------------|-------------|-----------------------------------------------------------|-------------|-------------|-------------|
| Pd                                                        | -0.13716200 | -2.01632700 | 0.71388000  | H                                                         | 1.64009600  | 4.01169000  | -2.98178600 |
| C                                                         | -2.33199500 | -0.87149800 | 2.18564700  | H                                                         | 1.34404600  | 4.98626400  | -1.50099000 |
| O                                                         | -1.73796900 | -2.00593000 | 1.89553300  | C                                                         | -1.20300900 | -2.25187700 | 0.44279100  |
| C                                                         | -3.51722000 | -1.06574600 | 3.12114800  | C                                                         | -1.43237800 | -1.78805600 | 1.91500000  |
| H                                                         | -3.93195900 | -0.09416300 | 3.39196500  | H                                                         | -1.07083400 | -3.34246700 | 0.49920600  |
| H                                                         | -3.20586900 | -1.60415600 | 4.02062600  | C                                                         | -2.44567600 | -2.08700100 | -0.43443200 |
| H                                                         | -4.28286300 | -1.67241400 | 2.62804300  | O                                                         | -3.51723700 | -1.64630100 | -0.06315400 |
| O                                                         | -1.99437200 | 0.23121600  | 1.76348500  | O                                                         | -2.23164000 | -2.59323400 | -1.66045900 |
| C                                                         | 1.76127800  | -0.39517400 | 2.17962000  | C                                                         | -3.32581400 | -2.49697900 | -2.58417600 |
| H                                                         | 0.69815900  | -0.60743000 | 1.86266300  | H                                                         | -3.03801600 | -3.10049300 | -3.44499300 |
| H                                                         | 2.44103500  | -0.80373600 | 1.43419300  | H                                                         | -3.46484300 | -1.45554900 | -2.88293100 |
| C                                                         | 2.01490600  | -1.08272100 | 3.52572400  | H                                                         | -4.24685300 | -2.87683200 | -2.13600800 |
| H                                                         | 2.01089300  | -2.17152600 | 3.41327100  | C                                                         | -2.56851600 | 1.15534500  | -0.94593800 |
| H                                                         | 2.99649200  | -0.79326600 | 3.91764100  | O                                                         | -2.30187300 | 1.72966000  | 0.15355200  |
| H                                                         | 1.26251400  | -0.82185200 | 4.27434000  | O                                                         | -1.78897400 | 0.40622500  | -1.60680500 |
| C                                                         | 0.90257100  | 1.79272200  | 3.17981000  | C                                                         | -3.96795800 | 1.34440100  | -1.48704900 |
| H                                                         | 1.07767300  | 1.44867700  | 4.20335900  | H                                                         | -4.55730100 | 0.47862000  | -1.16831200 |
| H                                                         | 0.99251900  | 2.88142400  | 3.16838200  | H                                                         | -3.95188500 | 1.37369200  | -2.57825400 |
| H                                                         | -0.12649500 | 1.53925000  | 2.90670600  | H                                                         | -4.41685700 | 2.25229900  | -1.08322200 |
| H                                                         | 2.91969700  | 1.32319900  | 2.58084800  | Pd                                                        | -0.45160300 | 1.56681000  | 1.05983800  |
|                                                           |             |             |             | C                                                         | 1.79938200  | 0.77226600  | 2.63323600  |
|                                                           |             |             |             | O                                                         | 1.36865800  | 1.78406200  | 2.00729300  |
| TS2-γ'                                                    |             |             |             | C                                                         | 3.15030200  | 0.85918100  | 3.30152400  |
| Thermal correction to Gibbs Free Energy= 0.374807 Hartree |             |             |             | H                                                         | 3.00871500  | 0.84067100  | 4.38650900  |
| SCF Done: E(RM06) = -1781.66449916 Hartree                |             |             |             | H                                                         | 3.66590300  | 1.77555600  | 3.01620200  |
| 0 1                                                       |             |             |             | H                                                         | 3.74678300  | -0.01659900 | 3.03461400  |
| C                                                         | 2.32343000  | -1.87973700 | -0.74671800 | O                                                         | 1.14497200  | -0.31045700 | 2.73953300  |
| C                                                         | 3.56594300  | -2.50514000 | -0.76054400 | C                                                         | -1.43787900 | -0.24028700 | 2.19141000  |
| C                                                         | 4.65626900  | -1.82136000 | -1.29355700 | H                                                         | -0.02384900 | -0.11038600 | 2.24370300  |
| C                                                         | 4.47258700  | -0.53124100 | -1.79765300 | H                                                         | -2.24922400 | 0.12843000  | 1.57064500  |
| C                                                         | 3.20264400  | 0.03688800  | -1.75590400 | C                                                         | -1.78278800 | 0.11737900  | 3.64599900  |
| H                                                         | 3.62912800  | -3.50714200 | -0.35153000 | H                                                         | -2.03310300 | 1.17947500  | 3.72842600  |
| H                                                         | 5.63767800  | -2.28521900 | -1.31892100 | H                                                         | -2.65619700 | -0.45487700 | 3.98776000  |
| H                                                         | 5.29638000  | 0.03246200  | -2.22157900 | H                                                         | -0.96094000 | -0.08737600 | 4.33790300  |
| H                                                         | 2.98101800  | 1.02701100  | -2.13768900 | C                                                         | -0.58710200 | -2.64146800 | 2.87823500  |
| N                                                         | 2.16338900  | -0.63439700 | -1.23484800 | H                                                         | -0.77408300 | -2.35936900 | 3.91811600  |
| C                                                         | 1.10346200  | -2.54160100 | -0.16192600 | H                                                         | -0.86376700 | -3.69508000 | 2.76786100  |
| O                                                         | 1.19792700  | -3.66940600 | 0.33404300  | H                                                         | 0.48265200  | -2.56233000 | 2.69144100  |
| N                                                         | 0.00057200  | -1.75711900 | -0.22406500 | H                                                         | -2.48235600 | -2.05259000 | 2.10818200  |
| Pd                                                        | 0.22773600  | -0.00091800 | -1.22320600 |                                                           |             |             |             |
| C                                                         | 0.58827300  | 2.96981700  | -1.40501600 |                                                           |             |             |             |
| O                                                         | 0.18044600  | 3.13805800  | -0.22093000 | 10                                                        |             |             |             |
| O                                                         | 0.72192300  | 1.87202800  | -2.04449900 | Thermal correction to Gibbs Free Energy= 0.378496 Hartree |             |             |             |
| C                                                         | 0.93790000  | 4.23156500  | -2.17630700 | SCF Done: E(RM06) = -1781.71782392 Hartree                |             |             |             |
| H                                                         | 0.01981500  | 4.63204200  | -2.61948800 | 0 1                                                       |             |             |             |



|    |             |             |             |                                                            |             |             |             |
|----|-------------|-------------|-------------|------------------------------------------------------------|-------------|-------------|-------------|
| O  | 0.88581200  | 3.65758400  | -2.11868000 | H                                                          | -4.99347500 | -2.02910300 | -1.29598400 |
| O  | 2.97456400  | 3.02485300  | -1.54461100 | C                                                          | -6.91324800 | 0.30678600  | 0.26952600  |
| C  | 3.28438000  | 4.39389100  | -1.24791100 | H                                                          | -6.15478900 | 1.89051000  | 1.52227100  |
| H  | 4.36082000  | 4.42178900  | -1.07874100 | H                                                          | -7.36527200 | -1.36093500 | -1.02300500 |
| H  | 2.75135700  | 4.70623300  | -0.34682800 | H                                                          | -7.95195400 | 0.60196800  | 0.38576100  |
| H  | 3.00680700  | 5.04510700  | -2.08022200 |                                                            |             |             |             |
| C  | -0.01487500 | 3.06826700  | 1.06394500  |                                                            |             |             |             |
| O  | -1.07538500 | 2.39912500  | 1.00353900  | TS3-v'                                                     |             |             |             |
| O  | 1.16476300  | 2.61641600  | 0.86979800  | Thermal correction to Gibbs Free Energy= 0.499244s Hartree |             |             |             |
| C  | -0.10737300 | 4.55886100  | 1.32323400  | SCF Done: E(RM06) = -2091.81277973 Hartree                 |             |             |             |
| H  | -1.07952500 | 4.81464800  | 1.74551800  | O 1                                                        |             |             |             |
| H  | 0.01120900  | 5.07028800  | 0.36180400  | C                                                          | -2.49873500 | 1.72886500  | -1.75580800 |
| H  | 0.69769900  | 4.88465300  | 1.98516300  | C                                                          | -2.92302400 | 2.86512900  | -2.43685000 |
| Pd | -1.11908300 | 0.36001300  | 0.15834400  | C                                                          | -3.47548500 | 3.91730800  | -1.71052800 |
| C  | -1.12071700 | 1.30684800  | -1.70425600 | C                                                          | -3.59056300 | 3.79985700  | -0.32365000 |
| H  | -0.95891000 | 2.31371000  | -1.32311200 | C                                                          | -3.14740200 | 2.63480300  | 0.29567500  |
| C  | -2.47486000 | 1.27037900  | -2.40046900 | H                                                          | -2.80371400 | 2.87959600  | -3.51414900 |
| H  | -2.44220000 | 1.93270700  | -3.27834000 | H                                                          | -3.81549400 | 4.81636900  | -2.21550800 |
| H  | -2.76018800 | 0.27529500  | -2.74960000 | H                                                          | -4.01947000 | 4.59422300  | 0.27732600  |
| H  | -3.26703300 | 1.64053500  | -1.74592800 | H                                                          | -3.22306800 | 2.46786500  | 1.36363800  |
| C  | 0.00130700  | -0.49766300 | -3.19077400 | N                                                          | -2.60797800 | 1.63290100  | -0.41604200 |
| H  | -0.97434900 | -0.71620800 | -3.63362200 | C                                                          | -1.87502900 | 0.56080400  | -2.47187600 |
| H  | 0.76496900  | -0.64288200 | -3.95938300 | O                                                          | -1.71081100 | 0.61056400  | -3.69745400 |
| H  | 0.18445100  | -1.23212700 | -2.40447700 | N                                                          | -1.52254300 | -0.44176600 | -1.63268900 |
| H  | -0.12102800 | 1.61290400  | -3.49442500 | Pd                                                         | -2.04330300 | -0.18818600 | 0.31984900  |
| C  | -2.86473300 | -0.88052100 | -0.18406100 | C                                                          | -1.52164300 | 0.76459000  | 3.02994000  |
| C  | -1.87795200 | -1.62893700 | -0.37979000 | O                                                          | -0.31185600 | 0.87464000  | 2.70442800  |
| C  | -1.15946100 | -2.86788600 | -0.55456100 | O                                                          | -2.48173500 | 0.34882700  | 2.28927300  |
| C  | -1.39089200 | -3.66821000 | -1.68908400 | C                                                          | -1.90658900 | 1.14889100  | 4.44899500  |
| C  | -0.25873800 | -3.31467500 | 0.43024500  | H                                                          | -1.31702400 | 2.00671100  | 4.77914900  |
| C  | -0.73663900 | -4.89003400 | -1.83104000 | H                                                          | -1.66637800 | 0.30774000  | 5.10815500  |
| H  | -2.08060900 | -3.32246500 | -2.45226900 | H                                                          | -2.97420200 | 1.35880200  | 4.52877100  |
| C  | 0.38498900  | -4.54075400 | 0.28146700  | C                                                          | -0.78610900 | -1.55200400 | -2.21703900 |
| H  | -0.09660200 | -2.69426700 | 1.30494300  | C                                                          | 0.76838900  | -1.47982000 | -2.09039600 |
| C  | 0.15204300  | -5.33048700 | -0.84791200 | H                                                          | -0.98687500 | -1.50065800 | -3.29772400 |
| H  | -0.92152400 | -5.49877100 | -2.71128700 | C                                                          | -1.34871000 | -2.90992400 | -1.79249400 |
| H  | 1.07113800  | -4.88218100 | 1.05112900  | O                                                          | -0.68060400 | -3.87072400 | -1.45800700 |
| H  | 0.65907800  | -6.28434100 | -0.96086800 | O                                                          | -2.68298200 | -2.94116300 | -1.92727200 |
| C  | -4.22992400 | -0.45272900 | -0.03263400 | C                                                          | -3.32400500 | -4.15790500 | -1.51529100 |
| C  | -4.56912700 | 0.65917500  | 0.76122900  | H                                                          | -4.37070400 | -4.04855800 | -1.79876300 |
| C  | -5.25337300 | -1.17459500 | -0.67914900 | H                                                          | -3.23275200 | -4.27004500 | -0.43275500 |
| C  | -5.90323500 | 1.03101800  | 0.90796200  | H                                                          | -2.87637900 | -5.02116200 | -2.01339600 |
| H  | -3.77847700 | 1.22108900  | 1.24821800  | C                                                          | -1.10815100 | -2.64373100 | 1.80674500  |
| C  | -6.58398700 | -0.79623100 | -0.52260300 | O                                                          | -0.06217600 | -2.09687500 | 2.23320000  |
|    |             |             |             | O                                                          | -1.90042400 | -2.17125100 | 0.91509600  |

|    |             |             |             |    |   |             |             |             |
|----|-------------|-------------|-------------|----|---|-------------|-------------|-------------|
| C  | -1.47596300 | -4.02268900 | 2.32308900  | O  | 1 |             |             |             |
| H  | -2.53841700 | -4.06208100 | 2.57561300  | C  |   | -2.40554500 | 1.89646200  | -1.46964800 |
| H  | -0.86782600 | -4.28165500 | 3.19015300  | C  |   | -2.87096400 | 3.11164800  | -1.96339700 |
| H  | -1.29357600 | -4.74760200 | 1.52269100  | C  |   | -3.56148600 | 3.96570700  | -1.10763600 |
| Pd | 0.76683400  | -0.32494600 | 1.15666300  | C  |   | -3.77477900 | 3.57378200  | 0.21600800  |
| C  | 1.33295200  | -1.75677800 | -0.67338700 | C  |   | -3.28437900 | 2.34391000  | 0.64452900  |
| H  | 0.52206400  | -2.12732100 | -0.05205600 | H  |   | -2.67934500 | 3.33517300  | -3.00658600 |
| C  | 2.40948400  | -2.82685700 | -0.63242900 | H  |   | -3.93709700 | 4.91955800  | -1.46570900 |
| H  | 1.92326500  | -3.75339100 | -0.95966000 | H  |   | -4.31821700 | 4.20360200  | 0.91195600  |
| H  | 3.25203100  | -2.62231900 | -1.29676200 | H  |   | -3.43326100 | 1.96811000  | 1.64934900  |
| H  | 2.79155000  | -2.98734500 | 0.37731100  | N  |   | -2.60590100 | 1.53717500  | -0.18735900 |
| C  | 1.30298700  | -0.25800700 | -2.84766000 | C  |   | -1.68058200 | 0.91470300  | -2.34982100 |
| H  | 2.39380500  | -0.28511000 | -2.90031400 | O  |   | -1.51183100 | 1.18822200  | -3.54621400 |
| H  | 0.90845500  | -0.24812400 | -3.86687300 | N  |   | -1.28303800 | -0.20217700 | -1.69595700 |
| H  | 1.00537700  | 0.67606800  | -2.36833400 | Pd |   | -1.89120100 | -0.32613300 | 0.26740200  |
| H  | 1.10890600  | -2.35872900 | -2.65622800 | C  |   | -1.78699300 | 0.28439700  | 3.14425600  |
| C  | 2.56249400  | -0.06495900 | -0.10244400 | O  |   | -0.61625600 | 0.70517400  | 2.98006100  |
| C  | 1.89042800  | 1.00969200  | 0.20053300  | O  |   | -2.56181600 | -0.19292900 | 2.23769600  |
| C  | 1.88151700  | 2.45031500  | 0.10751600  | C  |   | -2.37414300 | 0.31959000  | 4.54578200  |
| C  | 2.54534300  | 3.09288300  | -0.95991300 | H  |   | -2.01266400 | 1.19895200  | 5.08287600  |
| C  | 1.22867800  | 3.23851400  | 1.07763900  | H  |   | -2.02146000 | -0.56781300 | 5.08252500  |
| C  | 2.56886100  | 4.48202600  | -1.04219300 | H  |   | -3.46485200 | 0.29924600  | 4.52347800  |
| H  | 3.03653400  | 2.49223100  | -1.71762700 | C  |   | -0.62801200 | -1.21732600 | -2.51914800 |
| C  | 1.25913900  | 4.62761600  | 0.98603600  | C  |   | 0.92869700  | -1.21469000 | -2.49306800 |
| H  | 0.71295600  | 2.74191300  | 1.89241000  | H  |   | -0.91156600 | -0.98561500 | -3.55676600 |
| C  | 1.92706500  | 5.25416700  | -0.07015900 | C  |   | -1.20975100 | -2.61286300 | -2.27516900 |
| H  | 3.08576400  | 4.96345600  | -1.86736000 | O  |   | -0.56475000 | -3.64089200 | -2.21214400 |
| H  | 0.76147500  | 5.22616200  | 1.74393300  | O  |   | -2.55369600 | -2.57700700 | -2.24521200 |
| H  | 1.94578800  | 6.33823100  | -0.13723500 | C  |   | -3.19953600 | -3.83142600 | -1.98228000 |
| C  | 3.98551700  | -0.41317000 | -0.17707300 | H  |   | -4.26788300 | -3.63803000 | -2.07970900 |
| C  | 4.61446400  | -1.01749700 | 0.92738500  | H  |   | -2.96187000 | -4.15898900 | -0.96795800 |
| C  | 4.76455000  | -0.09022300 | -1.30140100 | H  |   | -2.87786100 | -4.59201400 | -2.69786700 |
| C  | 5.98004100  | -1.29100200 | 0.90378000  | C  |   | -0.80820700 | -2.83652700 | 1.53909100  |
| H  | 4.02006200  | -1.25817300 | 1.80371800  | O  |   | -0.02182000 | -2.22844500 | 2.29661600  |
| C  | 6.13343100  | -0.36043300 | -1.31737400 | O  |   | -1.46707000 | -2.33042500 | 0.55229400  |
| H  | 4.29923200  | 0.37805100  | -2.16212900 | C  |   | -1.03128500 | -4.32736600 | 1.72892400  |
| C  | 6.74530100  | -0.96543700 | -0.21895500 | H  |   | -0.39333000 | -4.71189100 | 2.52495800  |
| H  | 6.44855700  | -1.75417200 | 1.76741700  | H  |   | -0.81451900 | -4.84338400 | 0.78898900  |
| H  | 6.72054000  | -0.09828800 | -2.19296100 | H  |   | -2.08174100 | -4.51345200 | 1.97313700  |
| H  | 7.81000400  | -1.17884700 | -0.23548500 | Pd |   | 0.82960200  | -0.26259600 | 1.51961400  |
|    |             |             |             | C  |   | 1.53212800  | -1.55546200 | -1.07992500 |
|    |             |             |             | H  |   | 0.68455000  | -1.89570600 | -0.49092700 |
|    |             |             |             | C  |   | 2.46485900  | -2.77708700 | -1.17397000 |
|    |             |             |             | H  |   | 1.87791500  | -3.61691700 | -1.55171300 |

4-γ'

Thermal correction to Gibbs Free Energy= 0.501080 Hartree

SCF Done: E(RM06) = -2091.85060323 Hartree





|                                                           |             |             |             |    |             |             |             |
|-----------------------------------------------------------|-------------|-------------|-------------|----|-------------|-------------|-------------|
| H                                                         | -0.10417400 | -1.93515900 | 3.93388900  | H  | 2.16467900  | 2.54672900  | -3.75593000 |
| H                                                         | -0.34503300 | -3.68156200 | 4.00913900  | H  | 0.40565500  | 2.42357200  | -3.84857400 |
| C                                                         | -2.69828500 | -1.17130900 | 1.91094000  | C  | 5.95002000  | 1.64206800  | -0.86202300 |
| H                                                         | -3.20403900 | -0.35983600 | 1.40393700  | H  | 6.78198300  | 0.98170700  | -0.61673400 |
| H                                                         | -3.35488900 | -2.05012400 | 1.85572400  | H  | 5.65306800  | 2.22201000  | 0.01558700  |
| H                                                         | -2.59408900 | -0.90625500 | 2.96690500  | H  | 6.22768900  | 2.32936700  | -1.66542700 |
|                                                           |             |             |             | C  | 1.97550000  | 2.30568200  | 1.58772600  |
| 11                                                        |             |             |             | O  | 0.79763500  | 2.30319700  | 2.02390100  |
|                                                           |             |             |             | O  | 2.54451700  | 1.38592700  | 0.90285400  |
| Thermal correction to Gibbs Free Energy= 0.557657 Hartree |             |             |             | C  | 2.85721700  | 3.51091300  | 1.86205000  |
| SCF Done: E(RM06) = -2320.92269008 Hartree                |             |             |             | H  | 2.28675100  | 4.30694800  | 2.34100900  |
| 0 1                                                       |             |             |             | H  | 3.28019900  | 3.85843200  | 0.91508000  |
| C                                                         | 2.39600700  | -3.04109000 | -0.71213300 | H  | 3.68984900  | 3.21379700  | 2.50740200  |
| C                                                         | 2.48751900  | -4.39013700 | -1.03976800 | Pd | -0.82240300 | 1.25043900  | 0.99702400  |
| C                                                         | 2.20736800  | -5.34087200 | -0.06177800 | C  | -2.31881300 | 0.30415800  | 0.00566000  |
| C                                                         | 1.84344900  | -4.91293900 | 1.21706000  | C  | -2.32705400 | 0.22114400  | -1.35410800 |
| C                                                         | 1.76555300  | -3.54795400 | 1.47676000  | C  | -3.39093500 | -0.51517500 | -2.11176800 |
| H                                                         | 2.77598800  | -4.64123900 | -2.05411600 | C  | -3.03165600 | -1.34730800 | -3.18788400 |
| H                                                         | 2.27340800  | -6.40077200 | -0.28820500 | C  | -4.75819800 | -0.37177900 | -1.81944200 |
| H                                                         | 1.62243700  | -5.62050500 | 2.00868200  | C  | -3.99957400 | -2.02817700 | -3.92581800 |
| H                                                         | 1.50307300  | -3.14906300 | 2.44899300  | H  | -1.98351600 | -1.47376100 | -3.44122300 |
| N                                                         | 2.03018300  | -2.64114500 | 0.52267000  | C  | -5.72650700 | -1.04293200 | -2.56445500 |
| C                                                         | 2.67023900  | -1.95963500 | -1.72274000 | H  | -5.06712200 | 0.27299400  | -1.00359600 |
| O                                                         | 2.89175900  | -2.26555700 | -2.90122800 | C  | -5.35277800 | -1.87819700 | -3.61885400 |
| N                                                         | 2.61144000  | -0.71962400 | -1.18780000 | H  | -3.69359800 | -2.67370900 | -4.74445900 |
| Pd                                                        | 2.06913000  | -0.60668800 | 0.76049600  | H  | -6.77691400 | -0.90791200 | -2.32190400 |
| C                                                         | 0.25489500  | -0.65325400 | 3.11646600  | H  | -6.10797700 | -2.40151500 | -4.19821000 |
| O                                                         | -0.73153100 | -0.30581500 | 2.40321600  | C  | -3.23382700 | -0.41595100 | 0.92111700  |
| O                                                         | 1.47159200  | -0.74856000 | 2.76206300  | C  | -4.02495500 | 0.27740300  | 1.85500700  |
| C                                                         | -0.06201700 | -1.00742400 | 4.55896900  | C  | -3.29510800 | -1.82174800 | 0.91358900  |
| H                                                         | -0.18199100 | -0.07503200 | 5.12100100  | C  | -4.86739400 | -0.40634400 | 2.73028200  |
| H                                                         | 0.74314000  | -1.58844700 | 5.01074400  | H  | -3.97755800 | 1.36260800  | 1.89269600  |
| H                                                         | -1.00974800 | -1.54759600 | 4.60967000  | C  | -4.13194600 | -2.50505900 | 1.79293300  |
| C                                                         | 2.67946300  | 0.40840000  | -2.10493500 | H  | -2.68322200 | -2.37072400 | 0.20494400  |
| C                                                         | 1.31308300  | 1.12288500  | -2.34320400 | C  | -4.92439600 | -1.80134500 | 2.70358000  |
| H                                                         | 3.01848000  | -0.01359500 | -3.06209200 | H  | -5.47727300 | 0.15096800  | 3.43597900  |
| C                                                         | 0.12038600  | 0.15192500  | -2.22362100 | H  | -4.16745100 | -3.59088500 | 1.76685200  |
| H                                                         | 1.20483500  | 1.87506000  | -1.55298400 | H  | -5.57798900 | -2.33537400 | 3.38747500  |
| H                                                         | 0.16038300  | -0.59210600 | -3.03049100 | C  | -1.24662500 | 0.88216500  | -2.21603500 |
| H                                                         | 0.21082900  | -0.40072500 | -1.28688900 | H  | -1.62812200 | 0.99882800  | -3.23449800 |
| C                                                         | 3.76341500  | 1.40969200  | -1.68765000 | H  | -1.07265700 | 1.89218900  | -1.83761300 |
| O                                                         | 3.67504100  | 2.61835200  | -1.77480400 | C  | -2.16037800 | 3.75412400  | -0.20013600 |
| O                                                         | 4.87977900  | 0.78102100  | -1.27285200 | O  | -1.10099700 | 3.19170100  | 0.10198900  |
| C                                                         | 1.32622900  | 1.84965600  | -3.69750800 | O  | -3.29295000 | 3.11420400  | -0.41713500 |
| H                                                         | 1.40896200  | 1.13143900  | -4.52287500 |    |             |             |             |

|                                                           |             |             |             |    |             |             |             |
|-----------------------------------------------------------|-------------|-------------|-------------|----|-------------|-------------|-------------|
| H                                                         | -3.11648100 | 2.13505100  | -0.37015300 | H  | 0.26862400  | 4.60665200  | 1.86951800  |
| C                                                         | -2.24956700 | 5.24363900  | -0.36065900 | C  | -4.03221900 | 2.32035000  | -3.16620000 |
| H                                                         | -1.27926300 | 5.69674300  | -0.16464200 | H  | -5.05386200 | 1.94022000  | -3.16550300 |
| H                                                         | -2.99727500 | 5.63794600  | 0.33410300  | H  | -3.37646300 | 1.64835700  | -3.72407100 |
| H                                                         | -2.58450700 | 5.48445700  | -1.37370900 | H  | -3.99217600 | 3.31969700  | -3.60620400 |
|                                                           |             |             |             | C  | -0.30895400 | 0.26731000  | -2.73264400 |
| 11'                                                       |             |             |             | O  | 0.70999000  | -0.32884800 | -2.27683700 |
| Thermal correction to Gibbs Free Energy= 0.558632 Hartree |             |             |             | O  | -1.45139300 | 0.39046100  | -2.19208600 |
| SCF Done: E(RM06) = -2320.93548226 Hartree                |             |             |             | C  | -0.16132500 | 0.93209600  | -4.08885200 |
| 0 1                                                       |             |             |             | H  | 0.86586500  | 0.86133300  | -4.44618000 |
| C                                                         | -3.42908000 | 0.16797000  | 2.15899200  | H  | -0.47070200 | 1.97697800  | -4.00076300 |
| C                                                         | -4.05994900 | -0.03996700 | 3.38216200  | H  | -0.83205000 | 0.44341800  | -4.80261400 |
| C                                                         | -4.43999700 | -1.33295700 | 3.73150600  | Pd | 0.82671200  | -1.43943700 | -0.51932500 |
| C                                                         | -4.18877700 | -2.37945900 | 2.84054500  | C  | 2.36381100  | -0.24937500 | 0.00314900  |
| C                                                         | -3.56084900 | -2.10232200 | 1.63006700  | C  | 2.24730200  | 0.97586600  | 0.56520100  |
| H                                                         | -4.23800100 | 0.82690900  | 4.00813600  | C  | 3.44341200  | 1.84905400  | 0.81477600  |
| H                                                         | -4.93281200 | -1.52526700 | 4.67980100  | C  | 3.68401700  | 2.38121700  | 2.09284700  |
| H                                                         | -4.47928200 | -3.39899600 | 3.06957700  | C  | 4.32704400  | 2.18700300  | -0.22285300 |
| H                                                         | -3.35605700 | -2.85822800 | 0.88204600  | C  | 4.78088400  | 3.20981000  | 2.32972500  |
| N                                                         | -3.18627100 | -0.85165500 | 1.31410100  | H  | 3.01458600  | 2.13557500  | 2.91288900  |
| C                                                         | -3.03370900 | 1.54372800  | 1.69694200  | C  | 5.41867500  | 3.02289300  | 0.01129300  |
| O                                                         | -3.36329900 | 2.52345100  | 2.37857800  | H  | 4.14938700  | 1.79364800  | -1.21828600 |
| N                                                         | -2.34798600 | 1.54654600  | 0.52931900  | C  | 5.65209500  | 3.53548800  | 1.28866900  |
| Pd                                                        | -2.25261600 | -0.28937300 | -0.40615200 | H  | 4.95311400  | 3.60231000  | 3.32815800  |
| C                                                         | -1.70745900 | -3.04258600 | -1.56155800 | H  | 6.08603300  | 3.27620600  | -0.80775700 |
| O                                                         | -0.47699500 | -2.99201700 | -1.34531900 | H  | 6.50314200  | 4.18552800  | 1.47074800  |
| O                                                         | -2.58574800 | -2.16912000 | -1.23344500 | C  | 3.62329800  | -0.93031800 | -0.38877400 |
| C                                                         | -2.24679100 | -4.25374700 | -2.30758600 | C  | 3.85984100  | -1.24937500 | -1.74157500 |
| H                                                         | -3.29838100 | -4.42574400 | -2.07218400 | C  | 4.58491500  | -1.31422200 | 0.56524400  |
| H                                                         | -1.64728100 | -5.13573200 | -2.07552200 | C  | 5.02413200  | -1.91410500 | -2.12205000 |
| H                                                         | -2.16492900 | -4.06253100 | -3.38313800 | H  | 3.12119200  | -0.96296900 | -2.48332000 |
| C                                                         | -2.09990000 | 2.87387700  | -0.04962300 | C  | 5.74685200  | -1.98143600 | 0.17937000  |
| C                                                         | -0.73318200 | 3.54316900  | 0.25984500  | H  | 4.42586000  | -1.07460200 | 1.61238700  |
| H                                                         | -2.85988600 | 3.53201500  | 0.39845300  | C  | 5.97168300  | -2.28509000 | -1.16479500 |
| C                                                         | 0.52587200  | 2.71567400  | -0.07828300 | H  | 5.19157200  | -2.14409700 | -3.17071400 |
| H                                                         | -0.70504700 | 4.39905800  | -0.42507600 | H  | 6.47959100  | -2.26203200 | 0.93116500  |
| H                                                         | 0.42781200  | 2.29183200  | -1.08104300 | H  | 6.87706300  | -2.80558500 | -1.46363600 |
| H                                                         | 1.36773400  | 3.41748800  | -0.12905800 | C  | 0.90184600  | 1.59249600  | 0.91172000  |
| C                                                         | -2.42767000 | 2.91096700  | -1.54586900 | H  | 0.12713200  | 0.82261800  | 0.91077900  |
| O                                                         | -1.75819800 | 3.45735200  | -2.39982000 | H  | 0.94611600  | 2.00820800  | 1.92561200  |
| O                                                         | -3.63021900 | 2.35367900  | -1.78900400 | C  | 1.33108100  | -2.41490200 | 2.38262100  |
| C                                                         | -0.69086200 | 4.10780900  | 1.68943300  | O  | 0.93290500  | -2.66772000 | 1.24062500  |
| H                                                         | -0.82388000 | 3.33464600  | 2.44978300  | O  | 1.89503800  | -1.27875900 | 2.73996000  |
| H                                                         | -1.48899600 | 4.83969300  | 1.84473500  | H  | 2.00759400  | -0.69426000 | 1.93878400  |

|                                                           |             |             |             |    |             |             |             |
|-----------------------------------------------------------|-------------|-------------|-------------|----|-------------|-------------|-------------|
| C                                                         | 1.21258900  | -3.41429100 | 3.49863500  | C  | 6.00698300  | 1.32800300  | -0.79455600 |
| H                                                         | 0.65169500  | -4.28448500 | 3.16135800  | H  | 6.80784800  | 0.69110700  | -0.41865200 |
| H                                                         | 0.72371100  | -2.95141200 | 4.36018900  | H  | 5.69502200  | 2.04043600  | -0.02654300 |
| H                                                         | 2.21495600  | -3.71898300 | 3.81526300  | H  | 6.33640900  | 1.87997100  | -1.67865700 |
|                                                           |             |             |             | C  | 1.96647200  | 2.46082900  | 1.34810100  |
| TS6                                                       |             |             |             | O  | 0.75863900  | 2.58756800  | 1.68544100  |
| Thermal correction to Gibbs Free Energy= 0.554293 Hartree |             |             |             | O  | 2.51192700  | 1.43322800  | 0.82556400  |
| SCF Done: E(RM06) = -2320.89874506 Hartree                |             |             |             | C  | 2.89706100  | 3.63961400  | 1.55811500  |
| 0 1                                                       |             |             |             | H  | 2.35177000  | 4.50129100  | 1.94267300  |
| C                                                         | 2.28035800  | -3.18144700 | -0.09346000 | H  | 3.36464700  | 3.88303900  | 0.59937000  |
| C                                                         | 2.35320400  | -4.56706500 | -0.19379200 | H  | 3.69310600  | 3.35838400  | 2.25408000  |
| C                                                         | 1.97069500  | -5.34195300 | 0.89825600  | Pd | -0.81307700 | 1.56181500  | 0.67579400  |
| C                                                         | 1.52449200  | -4.70676300 | 2.05953300  | C  | -2.48201000 | 0.61106900  | -0.29945700 |
| C                                                         | 1.47015900  | -3.31649700 | 2.09187100  | C  | -2.26038000 | -0.02459600 | -1.51303200 |
| H                                                         | 2.70825600  | -4.98465500 | -1.12908600 | C  | -3.13369300 | -1.09764600 | -2.05796700 |
| H                                                         | 2.02068100  | -6.42551600 | 0.84977400  | C  | -2.58344600 | -2.14922600 | -2.81668100 |
| H                                                         | 1.22222500  | -5.27340300 | 2.93342600  | C  | -4.53346400 | -1.05223000 | -1.90527700 |
| H                                                         | 1.14727200  | -2.75962300 | 2.96323700  | C  | -3.39710300 | -3.13896000 | -3.36557800 |
| N                                                         | 1.83513500  | -2.58133100 | 1.02933200  | H  | -1.51057100 | -2.20633300 | -2.96122800 |
| C                                                         | 2.65718500  | -2.28049700 | -1.23950800 | C  | -5.34579000 | -2.02532600 | -2.48088600 |
| O                                                         | 2.93568200  | -2.77303700 | -2.33980900 | H  | -4.98448500 | -0.23855900 | -1.35008300 |
| N                                                         | 2.61034600  | -0.97043700 | -0.90843300 | C  | -4.78196200 | -3.07921300 | -3.20393800 |
| Pd                                                        | 1.93789200  | -0.53857000 | 0.95011700  | H  | -2.94694900 | -3.95080100 | -3.92952700 |
| C                                                         | -0.06431900 | -0.11569800 | 3.10747300  | H  | -6.42357700 | -1.95953000 | -2.36399300 |
| O                                                         | -0.94876800 | 0.21385100  | 2.26428500  | H  | -5.41752100 | -3.84205800 | -3.64431500 |
| O                                                         | 1.16655600  | -0.34869500 | 2.88807300  | C  | -3.45129300 | 0.13726700  | 0.72503000  |
| C                                                         | -0.54048000 | -0.26012400 | 4.54151300  | C  | -4.36153900 | 1.04201500  | 1.30048000  |
| H                                                         | -0.63011800 | 0.74206100  | 4.97419500  | C  | -3.45612500 | -1.19205600 | 1.18507800  |
| H                                                         | 0.16499800  | -0.83916200 | 5.13903100  | C  | -5.26357900 | 0.62563000  | 2.27987200  |
| H                                                         | -1.53335200 | -0.71475500 | 4.55677600  | H  | -4.36298400 | 2.07666600  | 0.96976500  |
| C                                                         | 2.75350000  | 0.00158400  | -1.98309000 | C  | -4.35347200 | -1.60619200 | 2.16584400  |
| C                                                         | 1.41793000  | 0.69786500  | -2.39224400 | H  | -2.74508200 | -1.89805100 | 0.76784300  |
| H                                                         | 3.12210200  | -0.56992700 | -2.84714100 | C  | -5.26482900 | -0.70022900 | 2.71641300  |
| C                                                         | 0.21402000  | -0.25197900 | -2.22329800 | H  | -5.96459000 | 1.33975800  | 2.70317600  |
| H                                                         | 1.27159900  | 1.54656900  | -1.71518400 | H  | -4.34181000 | -2.63889400 | 2.50445700  |
| H                                                         | 0.31959700  | -1.10080200 | -2.91043300 | H  | -5.96515900 | -1.02476100 | 3.48090200  |
| H                                                         | 0.23217900  | -0.66279000 | -1.21237500 | C  | -1.15403100 | 0.45946700  | -2.43560400 |
| C                                                         | 3.84762000  | 1.02956900  | -1.66967300 | H  | -1.47969800 | 0.35762900  | -3.47520100 |
| O                                                         | 3.79814000  | 2.21352100  | -1.93570600 | H  | -1.00378500 | 1.52273300  | -2.24127300 |
| O                                                         | 4.92681000  | 0.44212500  | -1.11824900 | C  | -1.81662500 | 3.70366300  | -1.04470400 |
| C                                                         | 1.51805600  | 1.23735500  | -3.82777800 | O  | -0.74069300 | 3.20109600  | -0.58403600 |
| H                                                         | 1.64131500  | 0.41639700  | -4.54543300 | O  | -2.93862600 | 3.11781400  | -1.04450200 |
| H                                                         | 2.36565100  | 1.91808200  | -3.92663600 | H  | -2.68761300 | 1.84366700  | -0.63007100 |
| H                                                         | 0.61467500  | 1.79011300  | -4.10686300 | C  | -1.72699500 | 5.10157000  | -1.61718500 |

|                                                           |             |             |             |    |             |             |             |
|-----------------------------------------------------------|-------------|-------------|-------------|----|-------------|-------------|-------------|
| H                                                         | -0.70996500 | 5.31386400  | -1.94806600 | H  | -4.88417900 | 2.39200800  | -2.97934100 |
| H                                                         | -1.99074800 | 5.81377300  | -0.82790300 | H  | -3.17745700 | 2.22866000  | -3.50168400 |
| H                                                         | -2.43815500 | 5.22063600  | -2.43597500 | H  | -3.84592600 | 3.84673500  | -3.15226900 |
|                                                           |             |             |             | C  | -0.10521100 | 0.76648500  | -2.54847500 |
| TS6'                                                      |             |             |             | O  | 0.89444600  | 0.14174600  | -2.08124800 |
|                                                           |             |             |             | O  | -1.30140200 | 0.74872500  | -2.12079600 |
| Thermal correction to Gibbs Free Energy= 0.555063 Hartree |             |             |             | C  | 0.14557900  | 1.65430100  | -3.75140900 |
| SCF Done: E(RM06) = -2320.91161806 Hartree                |             |             |             | H  | 1.20617300  | 1.67845600  | -4.00122000 |
| O 1                                                       |             |             |             | H  | -0.22564600 | 2.65850000  | -3.53050900 |
| C                                                         | -3.39962000 | -0.15274200 | 2.10377500  | H  | -0.42129300 | 1.26715900  | -4.60402600 |
| C                                                         | -4.03508200 | -0.56412700 | 3.27114300  | Pd | 0.74784600  | -1.36339800 | -0.66539200 |
| C                                                         | -4.35970200 | -1.90999000 | 3.42010900  | C  | 2.31229100  | -0.40305000 | 0.41395700  |
| C                                                         | -4.04701200 | -2.80314000 | 2.39246200  | C  | 2.24148500  | 0.92355900  | 0.78146000  |
| C                                                         | -3.41875600 | -2.32516300 | 1.24635500  | C  | 3.44113700  | 1.80246000  | 0.85420200  |
| H                                                         | -4.25657800 | 0.19130800  | 4.01624900  | C  | 3.76864500  | 2.45562100  | 2.05648700  |
| H                                                         | -4.85328700 | -2.26094300 | 4.32130000  | C  | 4.24878400  | 2.02693300  | -0.27357500 |
| H                                                         | -4.28755100 | -3.85793500 | 2.46779400  | C  | 4.88494100  | 3.28601800  | 2.13400400  |
| H                                                         | -3.16188600 | -2.95465400 | 0.40353700  | H  | 3.16205800  | 2.29168300  | 2.94197200  |
| N                                                         | -3.10504600 | -1.02532100 | 1.12246000  | C  | 5.34953200  | 2.87925300  | -0.19953900 |
| C                                                         | -3.03987900 | 1.28612700  | 1.85939700  | H  | 3.99672700  | 1.54814200  | -1.21196800 |
| O                                                         | -3.41485600 | 2.14856700  | 2.66356600  | C  | 5.67649900  | 3.50489200  | 1.00454700  |
| N                                                         | -2.31726000 | 1.47818800  | 0.72827100  | H  | 5.13354400  | 3.76608100  | 3.07608400  |
| Pd                                                        | -2.16655300 | -0.18749600 | -0.47390300 | H  | 5.95414100  | 3.05146300  | -1.08523400 |
| C                                                         | -1.58454000 | -2.61855700 | -2.19752000 | H  | 6.54069700  | 4.16026100  | 1.06263000  |
| O                                                         | -0.33732900 | -2.52214700 | -2.08096400 | C  | 3.58575100  | -1.09112500 | 0.02319500  |
| O                                                         | -2.46712200 | -1.93298800 | -1.58208000 | C  | 3.99655000  | -1.17044600 | -1.31954600 |
| C                                                         | -2.11431000 | -3.63884500 | -3.19021400 | C  | 4.36890400  | -1.72766900 | 1.00064200  |
| H                                                         | -3.05525000 | -4.06405600 | -2.83545800 | C  | 5.16468900  | -1.84764100 | -1.66820200 |
| H                                                         | -1.37595100 | -4.42264500 | -3.36211000 | H  | 3.38541100  | -0.70447600 | -2.08692700 |
| H                                                         | -2.31437200 | -3.13051700 | -4.13961500 | C  | 5.53890800  | -2.40245800 | 0.64934200  |
| C                                                         | -2.07902200 | 2.88124300  | 0.36852700  | H  | 4.05442000  | -1.69105800 | 2.03942800  |
| C                                                         | -0.73577100 | 3.51010200  | 0.82704700  | C  | 5.94194600  | -2.46498900 | -0.68544700 |
| H                                                         | -2.86628700 | 3.45261100  | 0.88343300  | H  | 5.46682800  | -1.89506800 | -2.71091200 |
| C                                                         | 0.54459300  | 2.76514700  | 0.38975200  | H  | 6.13534600  | -2.88126900 | 1.42131300  |
| H                                                         | -0.70325000 | 4.46680000  | 0.29240200  | H  | 6.85125400  | -2.99286400 | -0.95857300 |
| H                                                         | 0.45388800  | 2.46949900  | -0.65722300 | C  | 0.94388500  | 1.53767400  | 1.24256700  |
| H                                                         | 1.36982100  | 3.48557100  | 0.42859900  | H  | 0.15267900  | 0.78664100  | 1.22983200  |
| C                                                         | -2.35020100 | 3.14421500  | -1.11622700 | H  | 1.07168700  | 1.86540100  | 2.28306000  |
| O                                                         | -1.65551200 | 3.82242700  | -1.84720700 | C  | 0.83329800  | -2.85559500 | 1.87402400  |
| O                                                         | -3.52974800 | 2.61586000  | -1.49330000 | O  | 0.53605700  | -2.95169900 | 0.63848900  |
| C                                                         | -0.74023900 | 3.83104500  | 2.32996500  | O  | 1.35183800  | -1.84335300 | 2.42169500  |
| H                                                         | -0.86163500 | 2.93841900  | 2.94845300  | H  | 1.74098200  | -0.99413600 | 1.36959300  |
| H                                                         | -1.56527400 | 4.50260000  | 2.58382600  | C  | 0.56639100  | -4.07668800 | 2.73286600  |
| H                                                         | 0.19777500  | 4.32268400  | 2.61412600  | H  | -0.14161300 | -4.74846100 | 2.24727500  |
| C                                                         | -3.87475600 | 2.78999800  | -2.87609300 |    |             |             |             |

|                                                           |             |             |             |   |             |             |             |
|-----------------------------------------------------------|-------------|-------------|-------------|---|-------------|-------------|-------------|
| H                                                         | 0.19929900  | -3.76767600 | 3.71370500  | H | -5.45438200 | 4.30377700  | -0.16544400 |
| H                                                         | 1.51213000  | -4.60805800 | 2.88218900  | H | -4.89397700 | 1.98235500  | -0.95791100 |
|                                                           |             |             |             | N | -2.86903200 | 2.23487900  | -0.67146800 |
| 12                                                        |             |             |             | C | -0.46949400 | 2.44010800  | -0.38797300 |
| Thermal correction to Gibbs Free Energy= 0.607601 Hartree |             |             |             | O | 0.51610600  | 3.15829200  | -0.20926800 |
| SCF Done: E(RM06) = -2549.97468962 Hartree                |             |             |             | C | 0.87598500  | 0.58518900  | -1.04715000 |
| 0 1                                                       |             |             |             | C | 1.65367000  | -0.03247000 | 0.14764800  |
| Pd                                                        | -3.46151100 | -1.40775300 | 0.90448900  | H | 1.45283000  | 1.47252000  | -1.34367900 |
| O                                                         | -4.21340400 | -0.07015100 | -1.97026000 | C | 3.17060900  | -0.04005800 | -0.14588900 |
| C                                                         | -4.96758700 | -1.02373400 | -1.60288600 | H | 1.48864900  | 0.68356900  | 0.96369000  |
| O                                                         | -4.83622300 | -1.74641800 | -0.57283200 | C | 4.04258300  | -0.35085100 | 1.08790500  |
| C                                                         | -6.14017000 | -1.34970800 | -2.50664000 | H | 3.38760500  | -0.76893500 | -0.93376700 |
| H                                                         | -5.77598100 | -1.95024800 | -3.34685000 | H | 3.46033100  | 0.94474300  | -0.53290300 |
| H                                                         | -6.89600000 | -1.91887400 | -1.96547900 | H | 3.82754000  | -1.35770800 | 1.45961500  |
| H                                                         | -6.56515600 | -0.43044400 | -2.91483200 | C | 0.84637800  | -0.27412500 | -2.31188500 |
| Pd                                                        | -2.29658400 | 0.36685900  | -1.23867600 | O | 1.43438000  | -1.32523700 | -2.46944900 |
| C                                                         | -5.52579800 | -0.52151800 | 2.60135000  | O | 0.16256300  | 0.34415700  | -3.29497900 |
| O                                                         | -4.67876600 | -0.03396400 | 1.71346200  | C | 1.14157800  | -1.40718100 | 0.60185800  |
| O                                                         | -5.57466600 | -1.68855600 | 2.96271600  | H | 1.41618900  | -2.18125400 | -0.11815100 |
| C                                                         | -6.47696600 | 0.54480300  | 3.13512600  | H | 0.05532400  | -1.42711000 | 0.71317300  |
| H                                                         | -7.02219900 | 0.15069000  | 3.99361800  | H | 1.56903700  | -1.67932100 | 1.57224500  |
| H                                                         | -5.93060500 | 1.44914100  | 3.41689900  | C | 0.05344600  | -0.38681300 | -4.52752800 |
| H                                                         | -7.19133900 | 0.82168300  | 2.35267300  | H | -0.46679200 | 0.27781500  | -5.21699500 |
| C                                                         | -1.52753500 | -0.34662000 | 3.02342200  | H | -0.52509100 | -1.29854400 | -4.36417300 |
| O                                                         | -1.06179600 | 0.63179800  | 2.26952300  | H | 1.04292000  | -0.64492900 | -4.91195800 |
| O                                                         | -2.24602700 | -1.26802100 | 2.62706800  | H | 3.76831700  | 0.34661400  | 1.89303600  |
| C                                                         | -1.64649600 | -2.58302500 | -1.13705000 | N | -0.45981300 | 1.10611600  | -0.68909800 |
| O                                                         | -2.18263100 | -2.76076800 | -0.00415000 | H | -1.24108900 | 0.49759600  | 1.31042400  |
| O                                                         | -1.62169400 | -1.50451700 | -1.81637400 | C | 5.53299300  | -0.23756000 | 0.81218300  |
| C                                                         | -0.95758300 | -3.77205700 | -1.77175500 | C | 6.29475500  | -1.35295600 | 0.79959800  |
| H                                                         | 0.01459500  | -3.46003700 | -2.16004600 | H | 5.76309200  | -2.29413900 | 0.94370700  |
| H                                                         | -0.85167300 | -4.58268700 | -1.05101700 | C | 7.74898200  | -1.52553600 | 0.62447700  |
| H                                                         | -1.56318900 | -4.11950900 | -2.61555400 | C | 8.70577500  | -0.56234500 | 0.99764000  |
| C                                                         | -1.08219300 | -0.26264500 | 4.45459500  | C | 8.21609600  | -2.75038100 | 0.11093200  |
| H                                                         | -1.57920200 | -1.03295200 | 5.04165300  | C | 10.06750900 | -0.80910000 | 0.83620300  |
| H                                                         | 0.00331700  | -0.39162000 | 4.50403700  | H | 8.38026400  | 0.37695400  | 1.42911500  |
| H                                                         | -1.31335000 | 0.72976700  | 4.85138000  | C | 9.57778200  | -2.99425700 | -0.05735900 |
| C                                                         | -1.85063700 | 3.02529900  | -0.28206500 | H | 7.49443800  | -3.51577700 | -0.16435200 |
| C                                                         | -2.06988900 | 4.32563800  | 0.15854500  | C | 10.51195500 | -2.02138500 | 0.30237000  |
| C                                                         | -3.37751300 | 4.80429900  | 0.20661400  | H | 10.78680700 | -0.05200800 | 1.13657000  |
| C                                                         | -4.42326900 | 3.96932800  | -0.19164100 | H | 9.90905800  | -3.94583200 | -0.46404100 |
| C                                                         | -4.13424900 | 2.68025600  | -0.63050100 | H | 11.57471500 | -2.20892400 | 0.17837100  |
| H                                                         | -1.20691500 | 4.91702400  | 0.44215300  | C | 6.03833400  | 1.13421900  | 0.50847100  |
| H                                                         | -3.58137600 | 5.81418600  | 0.54900400  | C | 6.65127600  | 1.41686100  | -0.72417700 |

|                                                           |             |             |             |   |             |             |             |
|-----------------------------------------------------------|-------------|-------------|-------------|---|-------------|-------------|-------------|
| C                                                         | 5.86729800  | 2.18706500  | 1.42280700  | C | -1.97613600 | 2.81238200  | -0.95796400 |
| C                                                         | 7.09064800  | 2.70514000  | -1.02594800 | C | -2.23157600 | 4.17183100  | -0.81987100 |
| H                                                         | 6.77907500  | 0.61521900  | -1.44487700 | C | -3.55883500 | 4.59513500  | -0.76504600 |
| C                                                         | 6.31404500  | 3.47493100  | 1.12450200  | C | -4.57861600 | 3.64832900  | -0.86052500 |
| H                                                         | 5.39447800  | 1.99289300  | 2.38165500  | C | -4.25060700 | 2.30343600  | -1.01883400 |
| C                                                         | 6.92661000  | 3.73913500  | -0.10160000 | H | -1.39285300 | 4.85531400  | -0.76045500 |
| H                                                         | 7.55878900  | 2.90232500  | -1.98638400 | H | -3.79486800 | 5.64801300  | -0.64756600 |
| H                                                         | 6.18019000  | 4.27260900  | 1.84993100  | H | -5.62237700 | 3.93758700  | -0.81157200 |
| H                                                         | 7.26870300  | 4.74292000  | -0.33682100 | H | -4.99252900 | 1.52133500  | -1.10183000 |
|                                                           |             |             |             | N | -2.97002500 | 1.91104000  | -1.07109900 |
| TS7                                                       |             |             |             | C | -0.58208900 | 2.26707800  | -1.02838000 |
| Thermal correction to Gibbs Free Energy= 0.605329 Hartree |             |             |             | O | 0.35367500  | 2.98677300  | -1.32330000 |
| SCF Done: E(RM06) = -2549.96110684 Hartree                |             |             |             | C | 0.86680300  | 0.32124800  | -0.99024900 |
| O 1                                                       |             |             |             | C | 1.66614800  | -0.08341800 | 0.27575100  |
| Pd                                                        | -3.41139700 | -1.11555300 | 1.20737800  | H | 1.41934500  | 1.15395800  | -1.44096300 |
| O                                                         | -4.19638300 | -0.64832300 | -1.93795500 | C | 3.17685400  | -0.12257100 | -0.05185500 |
| C                                                         | -4.94143000 | -1.47418700 | -1.30850600 | H | 1.51116600  | 0.75055800  | 0.97300000  |
| O                                                         | -4.80404200 | -1.86911600 | -0.12027500 | C | 4.08109300  | -0.23756900 | 1.19262600  |
| C                                                         | -6.10210300 | -2.05071200 | -2.09469700 | H | 3.38504400  | -0.95986900 | -0.72564800 |
| H                                                         | -5.72972200 | -2.87618500 | -2.71058500 | H | 3.44796300  | 0.79450200  | -0.59027200 |
| H                                                         | -6.86685500 | -2.43215600 | -1.41794800 | H | 3.90632300  | -1.19144700 | 1.69952700  |
| H                                                         | -6.51746400 | -1.29595200 | -2.76537300 | C | 0.82734400  | -0.73001400 | -2.10253000 |
| Pd                                                        | -2.33575300 | -0.01412500 | -1.26250500 | O | 1.43452800  | -1.77980400 | -2.10488600 |
| C                                                         | -5.50432500 | 0.17648800  | 2.58170600  | O | 0.11262800  | -0.28089800 | -3.15312700 |
| O                                                         | -4.64286000 | 0.42215400  | 1.61312500  | C | 1.18273900  | -1.36962000 | 0.96269200  |
| O                                                         | -5.59078800 | -0.87108400 | 3.20567800  | H | 1.42539800  | -2.24625900 | 0.35801000  |
| C                                                         | -6.41499800 | 1.37089300  | 2.85617500  | H | 0.10647800  | -1.36561400 | 1.14424400  |
| H                                                         | -7.10222200 | 1.12783100  | 3.66727800  | H | 1.66629000  | -1.48597200 | 1.93724100  |
| H                                                         | -5.81764500 | 2.24693600  | 3.12689500  | C | -0.01490000 | -1.19882800 | -4.25492900 |
| H                                                         | -6.98457400 | 1.62654700  | 1.95692600  | H | -0.56974500 | -0.65910900 | -5.02177900 |
| C                                                         | -1.36329100 | 0.51190800  | 2.73460000  | H | -0.56649000 | -2.08321100 | -3.93035900 |
| O                                                         | -0.90313800 | 1.17703900  | 1.74459600  | H | 0.97025000  | -1.49248500 | -4.62380300 |
| O                                                         | -2.15353200 | -0.46818600 | 2.70540600  | H | 3.80090900  | 0.55276200  | 1.90419000  |
| C                                                         | -1.62002600 | -2.80062500 | -0.48449700 | N | -0.49298500 | 0.88722800  | -0.69445000 |
| O                                                         | -2.12743400 | -2.67166600 | 0.66182100  | H | -0.77301700 | 0.87757700  | 0.53873600  |
| O                                                         | -1.61634300 | -1.93360400 | -1.42796100 | C | 5.56017100  | -0.11657300 | 0.86339500  |
| C                                                         | -0.93696800 | -4.11071200 | -0.81320200 | C | 6.35265000  | -1.20695800 | 0.94727300  |
| H                                                         | 0.01953000  | -3.90961900 | -1.30083600 | H | 5.85253900  | -2.13963600 | 1.21038400  |
| H                                                         | -0.79913900 | -4.70407600 | 0.09048900  | C | 7.80502100  | -1.36113700 | 0.74262600  |
| H                                                         | -1.56428800 | -4.66837400 | -1.51664300 | C | 8.74493300  | -0.33878700 | 0.97414300  |
| C                                                         | -0.87920500 | 0.95207600  | 4.10175500  | C | 8.29016500  | -2.62307300 | 0.34989400  |
| H                                                         | -1.40854300 | 0.41944300  | 4.89092700  | C | 10.10728200 | -0.56755000 | 0.79252700  |
| H                                                         | 0.19556000  | 0.76020300  | 4.18023700  | H | 8.40681800  | 0.63374500  | 1.31213800  |
| H                                                         | -1.02593600 | 2.03061300  | 4.20652800  | C | 9.65209800  | -2.84958300 | 0.16091400  |

|                                                           |             |             |             |   |             |             |             |
|-----------------------------------------------------------|-------------|-------------|-------------|---|-------------|-------------|-------------|
| H                                                         | 7.58239600  | -3.43212600 | 0.18599900  | H | 0.01186900  | -3.91394600 | -1.27996200 |
| C                                                         | 10.56884500 | -1.81969000 | 0.37881100  | H | -0.80726800 | -4.68192100 | 0.12491800  |
| H                                                         | 10.81385700 | 0.23570700  | 0.98297000  | H | -1.57598400 | -4.66737700 | -1.48172300 |
| H                                                         | 9.99743200  | -3.83155100 | -0.15060000 | C | -0.98632000 | 0.96648700  | 4.14660200  |
| H                                                         | 11.63198500 | -1.99299000 | 0.23858100  | H | -0.97699400 | 0.12184400  | 4.83706100  |
| C                                                         | 6.01569800  | 1.22737200  | 0.39848900  | H | -0.00253100 | 1.43592500  | 4.09179900  |
| C                                                         | 6.57650800  | 1.39400800  | -0.87926400 | H | -1.70066500 | 1.70457600  | 4.52789200  |
| C                                                         | 5.84724800  | 2.36590900  | 1.20434300  | C | -1.95243900 | 2.80790300  | -0.98137300 |
| C                                                         | 6.96765900  | 2.65411500  | -1.33011900 | C | -2.19612600 | 4.16539400  | -0.81208200 |
| H                                                         | 6.70302500  | 0.52427400  | -1.51644000 | C | -3.51754100 | 4.58601500  | -0.66209300 |
| C                                                         | 6.24623200  | 3.62602200  | 0.75685300  | C | -4.53954800 | 3.63892900  | -0.69790200 |
| H                                                         | 5.41665700  | 2.26114900  | 2.19650200  | C | -4.22367200 | 2.29531700  | -0.89584500 |
| C                                                         | 6.80677200  | 3.77512300  | -0.51286200 | H | -1.35782100 | 4.85176200  | -0.79873100 |
| H                                                         | 7.39630100  | 2.76080100  | -2.32275300 | H | -3.74520400 | 5.63692800  | -0.51521700 |
| H                                                         | 6.11732300  | 4.49165700  | 1.40073800  | H | -5.57736100 | 3.92519200  | -0.57013400 |
| H                                                         | 7.11219100  | 4.75666100  | -0.86388800 | H | -4.97044100 | 1.51465700  | -0.92760200 |
|                                                           |             |             |             | N | -2.95045900 | 1.90485800  | -1.04155600 |
|                                                           |             |             |             | C | -0.56805400 | 2.26716400  | -1.14743000 |
| 13                                                        |             |             |             | O | 0.33784600  | 2.94864500  | -1.57406300 |
| Thermal correction to Gibbs Free Energy= 0.608173 Hartree |             |             |             | C | 0.91919000  | 0.31580900  | -1.04497800 |
| SCF Done: E(RM06) = -2549.96489165 Hartree                |             |             |             | C | 1.69820300  | -0.05869600 | 0.24104700  |
| O 1                                                       |             |             |             | H | 1.46823900  | 1.13893200  | -1.51608300 |
| Pd                                                        | -3.42387100 | -1.08491000 | 1.22555600  | C | 3.21173500  | -0.11636500 | -0.06840400 |
| O                                                         | -4.19628800 | -0.62464900 | -1.95251000 | H | 1.53677800  | 0.79330800  | 0.91594200  |
| C                                                         | -4.93412400 | -1.46359700 | -1.32365200 | C | 4.10041100  | -0.21146700 | 1.18876700  |
| O                                                         | -4.78479500 | -1.86332700 | -0.14303100 | H | 3.42001700  | -0.97014600 | -0.72134400 |
| C                                                         | -6.09280900 | -2.03570800 | -2.11581500 | H | 3.49699800  | 0.78618300  | -0.62404000 |
| H                                                         | -5.71592700 | -2.84520500 | -2.74986700 | H | 3.91551200  | -1.15503000 | 1.71080500  |
| H                                                         | -6.84936500 | -2.43667900 | -1.44118900 | C | 0.86457900  | -0.76217600 | -2.13144900 |
| H                                                         | -6.51993000 | -1.27257200 | -2.76949700 | O | 1.46468000  | -1.81489600 | -2.11030600 |
| Pd                                                        | -2.33648400 | -0.02604500 | -1.28097900 | O | 0.14110600  | -0.33187800 | -3.18216500 |
| C                                                         | -5.59557900 | 0.16158700  | 2.52666200  | C | 1.19204000  | -1.32138800 | 0.95423600  |
| O                                                         | -4.68955300 | 0.43451500  | 1.60792600  | H | 1.42248000  | -2.21588800 | 0.37129900  |
| O                                                         | -5.71855200 | -0.90474100 | 3.11103200  | H | 0.11643900  | -1.29108100 | 1.13607600  |
| C                                                         | -6.50781700 | 1.35492200  | 2.80505600  | H | 1.67108700  | -1.41996400 | 1.93247500  |
| H                                                         | -7.27456000 | 1.06923100  | 3.52601300  | C | -0.01247500 | -1.27473900 | -4.26095000 |
| H                                                         | -5.92076900 | 2.18810500  | 3.20422300  | H | -0.56254000 | -0.74295900 | -5.03654000 |
| H                                                         | -6.98131500 | 1.69960000  | 1.88022900  | H | -0.57918000 | -2.13856900 | -3.90886100 |
| C                                                         | -1.44094500 | 0.52814500  | 2.76226500  | H | 0.96447800  | -1.59561900 | -4.62845100 |
| O                                                         | -1.01974900 | 1.16652700  | 1.76510700  | H | 3.81470900  | 0.59256100  | 1.88236400  |
| O                                                         | -2.24393700 | -0.46531300 | 2.76706700  | N | -0.44181000 | 0.88510200  | -0.75942400 |
| C                                                         | -1.62128000 | -2.78461500 | -0.47463900 | H | -0.68604100 | 0.85497200  | 0.30009100  |
| O                                                         | -2.09836800 | -2.62107500 | 0.67654900  | C | 5.58350400  | -0.10181600 | 0.87381000  |
| O                                                         | -1.63775700 | -1.94391700 | -1.44781300 | C | 6.37090700  | -1.19311100 | 0.98781300  |
| C                                                         | -0.94496800 | -4.10237500 | -0.78764900 |   |             |             |             |

|                                                           |             |             |             |   |             |             |             |
|-----------------------------------------------------------|-------------|-------------|-------------|---|-------------|-------------|-------------|
| H                                                         | 5.86441100  | -2.11875500 | 1.26320400  | H | 1.40357800  | -0.84693700 | 0.92133500  |
| C                                                         | 7.82499300  | -1.35605000 | 0.80322600  | C | -1.28470700 | -0.41114500 | 1.20608400  |
| C                                                         | 8.76568100  | -0.33270900 | 1.02687700  | H | -0.64020900 | 1.16918800  | -0.14128300 |
| C                                                         | 8.30999400  | -2.62670900 | 0.43961300  | H | -0.42556400 | -0.45239600 | -0.76719200 |
| C                                                         | 10.12922300 | -0.56939000 | 0.86552700  | C | 1.95781600  | 1.78695800  | -1.22178900 |
| H                                                         | 8.42715100  | 0.64696200  | 1.34316400  | O | 1.02510700  | 2.13461900  | -1.91163100 |
| C                                                         | 9.67320900  | -2.86122800 | 0.27076500  | O | 2.95947900  | 2.61822200  | -0.85221100 |
| H                                                         | 7.60131600  | -3.43633200 | 0.28265100  | C | 1.43290300  | 1.14936100  | 1.72533900  |
| C                                                         | 10.59098600 | -1.83053100 | 0.48036100  | H | 1.13232600  | 2.17010000  | 1.46106000  |
| H                                                         | 10.83645200 | 0.23476100  | 1.04957100  | H | 2.49707800  | 1.16341600  | 1.97961800  |
| H                                                         | 10.01866900 | -3.84995500 | -0.01837200 | H | 0.88579200  | 0.86988700  | 2.63004800  |
| H                                                         | 11.65505600 | -2.01001300 | 0.35592800  | C | 2.86085100  | 3.96408800  | -1.35133900 |
| C                                                         | 6.04860400  | 1.23162600  | 0.38852200  | H | 3.73533700  | 4.48614000  | -0.96410200 |
| C                                                         | 6.62606800  | 1.37187300  | -0.88501500 | H | 1.94091700  | 4.43560500  | -0.99801600 |
| C                                                         | 5.87267300  | 2.38623700  | 1.16965100  | H | 2.86228900  | 3.96653800  | -2.44379400 |
| C                                                         | 7.02609000  | 2.62199700  | -1.35552400 | H | -0.97086200 | -1.42792700 | 1.47043000  |
| H                                                         | 6.75902500  | 0.48941000  | -1.50311200 | H | -1.20860300 | 0.18919600  | 2.12182700  |
| C                                                         | 6.28048400  | 3.63640900  | 0.70256600  | N | 3.49570900  | 0.10849000  | -0.29597700 |
| H                                                         | 5.42977600  | 2.30199300  | 2.15834100  | H | 4.14086600  | 0.85968300  | -0.08666200 |
| C                                                         | 6.85752100  | 3.75925300  | -0.56259100 | C | -2.73384300 | -0.43165400 | 0.74963900  |
| H                                                         | 7.46797500  | 2.70811600  | -2.34434000 | C | -3.32055000 | -1.60833300 | 0.44183300  |
| H                                                         | 6.14604200  | 4.51473000  | 1.32787300  | H | -2.68104700 | -2.48947200 | 0.50454100  |
| H                                                         | 7.17020500  | 4.73294100  | -0.92874700 | C | -4.70159400 | -1.91799200 | 0.02769300  |
|                                                           |             |             |             | C | -4.92099200 | -3.08367000 | -0.73085500 |
|                                                           |             |             |             | C | -5.82459100 | -1.15114700 | 0.39280700  |
| 3-a                                                       |             |             |             | C | -6.20103200 | -3.45322100 | -1.13915800 |
| Thermal correction to Gibbs Free Energy= 0.429359 Hartree |             |             |             | H | -4.06934600 | -3.70104400 | -1.00638200 |
| SCF Done: E(RM06) = -1380.33251494 Hartree                |             |             |             | C | -7.10523300 | -1.52488200 | -0.00923000 |
| 0 1                                                       |             |             |             | H | -5.69409100 | -0.26744000 | 1.00618300  |
| C                                                         | 5.45844000  | -1.25382500 | 0.01659500  | C | -7.30146900 | -2.67212000 | -0.78209800 |
| C                                                         | 6.06583900  | -2.51143100 | 0.02012400  | H | -6.33927100 | -4.35375600 | -1.73121500 |
| C                                                         | 7.42161000  | -2.58889300 | 0.33045800  | H | -7.95669700 | -0.91947700 | 0.28959100  |
| C                                                         | 8.11213400  | -1.41279900 | 0.62416900  | H | -8.30191900 | -2.95893900 | -1.09329300 |
| C                                                         | 7.41333600  | -0.20368500 | 0.59424700  | C | -3.38791900 | 0.90396600  | 0.61380100  |
| H                                                         | 5.46553200  | -3.38166700 | -0.21822100 | C | -3.50934800 | 1.76319000  | 1.71877200  |
| H                                                         | 7.93132300  | -3.54791700 | 0.34358400  | C | -3.85061500 | 1.35444900  | -0.63394700 |
| H                                                         | 9.16877000  | -1.42594400 | 0.87171600  | C | -4.09431100 | 3.02314000  | 1.58559900  |
| H                                                         | 7.92038300  | 0.73289600  | 0.81803000  | H | -3.15963500 | 1.43454900  | 2.69383600  |
| N                                                         | 6.11312100  | -0.11604300 | 0.29753800  | C | -4.42694700 | 2.61689000  | -0.76933500 |
| C                                                         | 3.98838800  | -1.15476400 | -0.31946600 | H | -3.75187900 | 0.70551700  | -1.49843200 |
| O                                                         | 3.32007800  | -2.15310000 | -0.58780600 | C | -4.55409900 | 3.45524000  | 0.34028900  |
| C                                                         | 2.11139900  | 0.39012500  | -0.63305600 | H | -4.18976600 | 3.66730700  | 2.45545100  |
| C                                                         | 1.14964800  | 0.16535300  | 0.58172300  | H | -4.77386600 | 2.94735200  | -1.74438900 |
| H                                                         | 1.81036400  | -0.31525000 | -1.41369900 | H | -5.00436700 | 4.43816400  | 0.23471300  |
| C                                                         | -0.32620900 | 0.15806400  | 0.13892900  |   |             |             |             |



TS1-a

Thermal correction to Gibbs Free Energy= 0.375469 Hartree

SCF Done: E(RM06) = -1781.66626306 Hartree

0 1

|    |             |             |             |
|----|-------------|-------------|-------------|
| Pd | -2.09207500 | -0.02282600 | 1.31526500  |
| O  | -2.03635300 | -0.95971800 | -1.99781900 |
| C  | -3.15939400 | -0.89550700 | -1.39625700 |
| O  | -3.39246300 | -0.48029000 | -0.22809300 |
| C  | -4.36118200 | -1.38701900 | -2.18236600 |
| H  | -5.25431900 | -0.83243000 | -1.89031500 |
| H  | -4.18363300 | -1.30541000 | -3.25556400 |
| H  | -4.52377500 | -2.44200700 | -1.93690300 |
| Pd | -0.16217800 | -0.43622000 | -1.25645200 |
| C  | -1.02444500 | 1.94400400  | 2.33671200  |
| O  | -1.74724300 | 2.08493200  | 1.29059000  |
| O  | -0.93810700 | 0.76999900  | 2.83930000  |
| C  | -0.24765600 | 3.08262500  | 2.92037300  |
| H  | -0.73375500 | 4.03236500  | 2.68979000  |
| H  | -0.14330400 | 2.95322800  | 3.99931400  |
| H  | 0.75255700  | 3.07131900  | 2.47090300  |
| C  | -1.12931300 | -2.67177300 | 1.61530900  |
| O  | -2.18177300 | -1.95863100 | 1.86785000  |
| C  | -1.15043500 | -4.03906600 | 2.28324400  |
| H  | -0.76933700 | -3.93391200 | 3.30465600  |
| H  | -2.16762700 | -4.43074500 | 2.34376100  |
| H  | -0.50330900 | -4.73001900 | 1.74050000  |
| C  | 0.52404300  | 2.28229500  | -0.89634700 |
| C  | 0.50516400  | 3.67248100  | -0.90972900 |
| C  | -0.52189400 | 4.31949700  | -1.59188500 |
| C  | -1.50496500 | 3.55904000  | -2.22909500 |
| C  | -1.43379800 | 2.17120100  | -2.16488200 |
| H  | 1.29532500  | 4.19839500  | -0.38661300 |
| H  | -0.56039400 | 5.40384400  | -1.62734400 |
| H  | -2.32122200 | 4.02694900  | -2.76792800 |
| H  | -2.16478700 | 1.52270600  | -2.63154900 |
| N  | -0.42960100 | 1.56715800  | -1.51433600 |
| C  | 1.60232000  | 1.49136100  | -0.20857800 |
| O  | 2.34698500  | 2.05545800  | 0.60103500  |
| C  | 2.71028000  | -0.67919000 | -0.09775700 |
| C  | 3.15274200  | -1.81487800 | -1.08468900 |
| H  | 2.38850500  | -1.12417500 | 0.85102900  |
| C  | 2.17788000  | -3.00285200 | -1.22818600 |
| H  | 3.28602300  | -1.33593600 | -2.06362200 |

|   |             |             |             |
|---|-------------|-------------|-------------|
| C | 0.84155900  | -2.74667200 | -1.91384900 |
| H | 2.70499700  | -3.76719800 | -1.81296200 |
| H | 1.98717100  | -3.43835000 | -0.24106000 |
| H | 0.93354200  | -2.13293300 | -2.81510100 |
| C | 3.96840300  | 0.17780600  | 0.16252100  |
| O | 4.57463000  | 0.78337100  | -0.69364500 |
| O | 4.37648600  | 0.05374700  | 1.43913700  |
| C | 4.51293300  | -2.40529700 | -0.64828200 |
| H | 4.46239200  | -2.80098400 | 0.37246000  |
| H | 5.31656700  | -1.66888000 | -0.69308300 |
| H | 4.78950700  | -3.23132300 | -1.31039700 |
| C | 5.52769700  | 0.83984400  | 1.78187700  |
| H | 5.73273600  | 0.62165800  | 2.83008100  |
| H | 5.30616600  | 1.90113500  | 1.64533300  |
| H | 6.38395100  | 0.57063600  | 1.15784600  |
| H | 0.34368700  | -3.67742700 | -2.20866100 |
| N | 1.65177200  | 0.19794300  | -0.62273500 |
| O | -0.16130700 | -2.31352400 | 0.92628500  |
| H | 0.11632200  | -2.36030500 | -1.15638000 |

1a

Thermal correction to Gibbs Free Energy= 0.373924 Hartree

SCF Done: E(RM06) = -1781.67106392 Hartree

0 1

|    |             |             |             |
|----|-------------|-------------|-------------|
| Pd | -2.14140700 | -0.17886300 | 1.16036900  |
| O  | -1.91380500 | 0.66386100  | -2.21898600 |
| C  | -3.05457900 | 0.68366400  | -1.64071300 |
| O  | -3.31050200 | 0.48653700  | -0.42482000 |
| C  | -4.24420600 | 0.96511800  | -2.54071800 |
| H  | -5.01105100 | 1.50982800  | -1.98768800 |
| H  | -3.93893500 | 1.51586000  | -3.43144500 |
| H  | -4.67241600 | 0.00708900  | -2.85432900 |
| Pd | -0.07999500 | 0.29407000  | -1.31103400 |
| C  | -0.54345600 | 0.69816600  | 2.82101500  |
| O  | -0.96283900 | 1.45564300  | 1.87733000  |
| O  | -0.99993900 | -0.49519400 | 2.86444900  |
| C  | 0.47529000  | 1.17409700  | 3.80990000  |
| H  | 0.23403800  | 2.19030700  | 4.13159500  |
| H  | 0.51323000  | 0.50054500  | 4.66713300  |
| H  | 1.45442700  | 1.19307200  | 3.31758800  |
| C  | -2.45259800 | -2.96922000 | 0.73886300  |
| O  | -3.15690200 | -1.90486800 | 1.01616300  |
| C  | -3.24685600 | -4.25836200 | 0.90748600  |
| H  | -3.29642500 | -4.50630600 | 1.97298400  |

|                                                           |             |             |             |    |             |             |             |
|-----------------------------------------------------------|-------------|-------------|-------------|----|-------------|-------------|-------------|
| H                                                         | -4.27125900 | -4.13821700 | 0.54774400  | O  | -1.49682900 | -0.58660800 | -2.30341800 |
| H                                                         | -2.74722400 | -5.07157100 | 0.37871800  | C  | -2.58033500 | -1.20028400 | -2.08970600 |
| C                                                         | 1.27087900  | 2.40740000  | -0.01107500 | O  | -3.12480100 | -1.42720700 | -0.96250300 |
| C                                                         | 1.60409300  | 3.66055600  | 0.48890300  | C  | -3.31463800 | -1.74602600 | -3.29997900 |
| C                                                         | 0.85885900  | 4.76312200  | 0.07824100  | H  | -3.27933500 | -1.01565600 | -4.11128000 |
| C                                                         | -0.19995800 | 4.58014400  | -0.81432300 | H  | -2.79978500 | -2.64881900 | -3.64490600 |
| C                                                         | -0.48727900 | 3.29631700  | -1.26793000 | H  | -4.34602100 | -1.99561400 | -3.05139400 |
| H                                                         | 2.43533000  | 3.72745600  | 1.18120400  | Pd | 0.18901000  | -0.20586600 | -1.06053500 |
| H                                                         | 1.09710400  | 5.75561400  | 0.44807500  | C  | -2.80590700 | 1.78650300  | 1.66319400  |
| H                                                         | -0.80190300 | 5.41452400  | -1.15642100 | O  | -3.11592800 | 1.52382800  | 0.44754200  |
| H                                                         | -1.29809100 | 3.07844000  | -1.95251900 | O  | -2.34435200 | 0.82855000  | 2.37085500  |
| N                                                         | 0.24775200  | 2.24980600  | -0.86742800 | C  | -2.99873100 | 3.15716700  | 2.23480900  |
| C                                                         | 2.04114000  | 1.16554700  | 0.34225200  | H  | -2.46889500 | 3.24667900  | 3.18398300  |
| O                                                         | 2.89002700  | 1.19823500  | 1.24110300  | H  | -2.64255300 | 3.90661500  | 1.52412300  |
| C                                                         | 2.51470400  | -1.12641600 | -0.27740000 | H  | -4.06731900 | 3.33011800  | 2.39987200  |
| C                                                         | 2.47642100  | -2.07300500 | -1.52140700 | C  | -0.94356400 | -2.67649900 | 1.82067100  |
| H                                                         | 2.17193200  | -1.67855500 | 0.60690700  | O  | -2.13069900 | -2.26750200 | 1.62237900  |
| C                                                         | 1.14805100  | -2.83264700 | -1.70681600 | C  | -0.78002800 | -3.76549600 | 2.86119000  |
| H                                                         | 2.65710900  | -1.43730500 | -2.39891100 | H  | -0.20282100 | -3.36053000 | 3.69847100  |
| C                                                         | -0.06146200 | -2.00072100 | -2.10884900 | H  | -1.74778000 | -4.11404000 | 3.22078100  |
| H                                                         | 1.30921600  | -3.57285300 | -2.50071500 | H  | -0.20679400 | -4.59416800 | 2.43760000  |
| H                                                         | 0.89820000  | -3.39166300 | -0.79934700 | C  | 0.81836800  | 2.45699800  | -0.21061000 |
| H                                                         | 0.14553200  | -1.35064700 | -2.96801800 | C  | 0.78959800  | 3.82740900  | 0.02874300  |
| C                                                         | 3.98947700  | -0.73406300 | -0.05287400 | C  | -0.18727300 | 4.59540800  | -0.60313500 |
| O                                                         | 4.63847300  | -0.04306800 | -0.80651400 | C  | -1.11294700 | 3.96940600  | -1.44115000 |
| O                                                         | 4.49094900  | -1.35440900 | 1.03085600  | C  | -1.03818800 | 2.58900400  | -1.61548800 |
| C                                                         | 3.60890700  | -3.11859200 | -1.44706600 | H  | 1.54162400  | 4.24336000  | 0.68926300  |
| H                                                         | 3.53553600  | -3.71894800 | -0.53380400 | H  | -0.22566500 | 5.66986700  | -0.44934000 |
| H                                                         | 4.59782200  | -2.65666600 | -1.47569100 | H  | -1.88632100 | 4.53309200  | -1.95121800 |
| H                                                         | 3.54153600  | -3.79989800 | -2.30052100 | H  | -1.73805900 | 2.03815500  | -2.23269900 |
| C                                                         | 5.86020500  | -1.04012300 | 1.32803300  | N  | -0.08481300 | 1.86555900  | -1.01432100 |
| H                                                         | 6.11093000  | -1.62310000 | 2.21426100  | C  | 1.89646400  | 1.57774800  | 0.37007500  |
| H                                                         | 5.96222800  | 0.02903400  | 1.52909900  | O  | 2.71185100  | 2.05486600  | 1.16724800  |
| H                                                         | 6.51204600  | -1.30956900 | 0.49284400  | C  | 3.02640800  | -0.54988400 | 0.20352000  |
| H                                                         | -0.92819900 | -2.61120200 | -2.37605100 | C  | 3.24331000  | -1.69135700 | -0.83690200 |
| N                                                         | 1.73419400  | 0.10566300  | -0.44558400 | H  | 2.89049200  | -0.99036200 | 1.19968600  |
| O                                                         | -1.26943200 | -2.97630400 | 0.39336800  | C  | 2.13637100  | -2.75992200 | -0.81212400 |
| H                                                         | -0.49386500 | -1.53245400 | -1.16774900 | H  | 3.25902500  | -1.20958700 | -1.82383100 |
|                                                           |             |             |             | C  | 0.75466800  | -2.30179900 | -1.26971200 |
|                                                           |             |             |             | H  | 2.45509700  | -3.57463100 | -1.47777900 |
| TS2-a                                                     |             |             |             | H  | 2.07634000  | -3.18775400 | 0.19391500  |
| Thermal correction to Gibbs Free Energy= 0.368407 Hartree |             |             |             | H  | 0.78109700  | -2.03367700 | -2.33330900 |
| SCF Done: E(RM06) = -1781.64650679 Hartree                |             |             |             | C  | 4.31771400  | 0.28952800  | 0.22895200  |
| 0 1                                                       |             |             |             | O  | 4.72860100  | 0.94983900  | -0.70003800 |
| Pd                                                        | -2.56890000 | -0.47876100 | 0.75646500  |    |             |             |             |

|                                                           |             |             |             |                                                           |             |             |             |
|-----------------------------------------------------------|-------------|-------------|-------------|-----------------------------------------------------------|-------------|-------------|-------------|
| O                                                         | 4.99778400  | 0.09479500  | 1.37624200  | C                                                         | -1.15034400 | 2.60819300  | -1.48767200 |
| C                                                         | 4.60059900  | -2.38753300 | -0.61755000 | H                                                         | 1.49673300  | 4.19193400  | 0.77654800  |
| H                                                         | 4.67599800  | -2.80100400 | 0.39458800  | H                                                         | -0.30160200 | 5.65483100  | -0.25798000 |
| H                                                         | 5.44108500  | -1.70696700 | -0.77043900 | H                                                         | -2.00527400 | 4.56465200  | -1.75073600 |
| H                                                         | 4.71550300  | -3.21461400 | -1.32510900 | H                                                         | -1.86954900 | 2.08459200  | -2.10845200 |
| C                                                         | 6.20672100  | 0.85789700  | 1.49642100  | N                                                         | -0.19025900 | 1.85528700  | -0.93476300 |
| H                                                         | 6.63640900  | 0.58208900  | 2.45976200  | C                                                         | 1.85584200  | 1.56202600  | 0.38140500  |
| H                                                         | 5.97755800  | 1.92606200  | 1.47012400  | O                                                         | 2.70847400  | 2.07447800  | 1.12164000  |
| H                                                         | 6.90015600  | 0.62262100  | 0.68449200  | C                                                         | 3.07594000  | -0.47927100 | 0.23878300  |
| H                                                         | 0.00996500  | -3.10371400 | -1.20202500 | C                                                         | 3.22764900  | -1.74876200 | -0.64052200 |
| N                                                         | 1.89854200  | 0.31978200  | -0.13190500 | H                                                         | 3.08170000  | -0.77754900 | 1.29627700  |
| O                                                         | 0.10695100  | -2.25490500 | 1.25276800  | C                                                         | 2.01896700  | -2.69178200 | -0.50763900 |
| H                                                         | 0.19756900  | -1.84695900 | -0.00844400 | H                                                         | 3.28901500  | -1.40454800 | -1.68174000 |
|                                                           |             |             |             | C                                                         | 0.77596900  | -2.25774700 | -1.26635400 |
| 2a                                                        |             |             |             | H                                                         | 2.32403100  | -3.67972300 | -0.88733800 |
| Thermal correction to Gibbs Free Energy= 0.372957 Hartree |             |             |             | H                                                         | 1.80257200  | -2.83815900 | 0.55855300  |
| SCF Done: E(RM06) = -1781.68032781 Hartree                |             |             |             | H                                                         | 0.92666000  | -2.36332600 | -2.34883100 |
| O 1                                                       |             |             |             | C                                                         | 4.31896800  | 0.39792700  | 0.00909700  |
| Pd                                                        | -2.54502800 | -0.55207900 | 0.65834500  | O                                                         | 4.56454700  | 0.99530200  | -1.01593700 |
| O                                                         | -1.46483400 | -0.81310400 | -2.34856700 | O                                                         | 5.16956300  | 0.32486400  | 1.05581200  |
| C                                                         | -2.48084200 | -1.50084600 | -2.09360100 | C                                                         | 4.52558800  | -2.50108500 | -0.29830800 |
| O                                                         | -3.00460600 | -1.70427300 | -0.93820100 | H                                                         | 4.52410100  | -2.83934800 | 0.74485400  |
| C                                                         | -3.17889900 | -2.20420100 | -3.24173200 | H                                                         | 5.41652400  | -1.88549800 | -0.44449100 |
| H                                                         | -3.10996900 | -1.59111100 | -4.14221600 | H                                                         | 4.62604800  | -3.38513700 | -0.93600100 |
| H                                                         | -2.65882700 | -3.14823700 | -3.43675200 | C                                                         | 6.34890900  | 1.13040300  | 0.92972600  |
| H                                                         | -4.21938500 | -2.42061700 | -2.99809600 | H                                                         | 6.92993500  | 0.94982700  | 1.83471900  |
| Pd                                                        | 0.21491200  | -0.30211800 | -1.11502400 | H                                                         | 6.07580400  | 2.18606000  | 0.85500300  |
| C                                                         | -3.16842300 | 1.70037800  | 1.37709200  | H                                                         | 6.92277200  | 0.84960300  | 0.04232900  |
| O                                                         | -3.47500000 | 1.25957600  | 0.21345600  | H                                                         | -0.09892300 | -2.85560300 | -0.98318200 |
| O                                                         | -2.51271900 | 0.91005100  | 2.14129900  | N                                                         | 1.86439800  | 0.28469800  | -0.06951300 |
| C                                                         | -3.53681800 | 3.08321500  | 1.80789500  | O                                                         | 0.32839800  | -1.38876200 | 2.06832900  |
| H                                                         | -3.46760200 | 3.17032600  | 2.89308100  | H                                                         | 0.22649000  | -0.84705400 | 1.23862800  |
| H                                                         | -2.84139000 | 3.79143600  | 1.34529600  |                                                           |             |             |             |
| H                                                         | -4.54538400 | 3.32388000  | 1.46398100  | M1                                                        |             |             |             |
| C                                                         | -0.66128300 | -2.22166300 | 2.27426800  | Thermal correction to Gibbs Free Energy= 0.283185 Hartree |             |             |             |
| O                                                         | -1.75093600 | -2.20200000 | 1.67695300  | SCF Done: E(RM06) = -1196.88173265 Hartree                |             |             |             |
| C                                                         | -0.37903300 | -3.25917700 | 3.32135800  | O 1                                                       |             |             |             |
| H                                                         | 0.03995400  | -2.77792600 | 4.20879500  | C                                                         | 1.33815200  | 2.15557700  | -0.35553300 |
| H                                                         | -1.29087500 | -3.79964600 | 3.56993200  | C                                                         | 1.86472200  | 3.43648400  | -0.48106100 |
| H                                                         | 0.37365400  | -3.95563600 | 2.93815900  | C                                                         | 3.23557300  | 3.61600900  | -0.31083200 |
| C                                                         | 0.73619200  | 2.42905800  | -0.14613000 | C                                                         | 4.04073400  | 2.51120000  | -0.01936400 |
| C                                                         | 0.72000700  | 3.79546200  | 0.13329300  | C                                                         | 3.45014300  | 1.25603600  | 0.09176400  |
| C                                                         | -0.27269800 | 4.58478200  | -0.44318400 | H                                                         | 1.17750900  | 4.24477600  | -0.70421800 |
| C                                                         | -1.22301400 | 3.98410500  | -1.27301200 | H                                                         | 3.67596000  | 4.60422600  | -0.40187200 |





|                                                           |             |             |             |    |             |             |             |
|-----------------------------------------------------------|-------------|-------------|-------------|----|-------------|-------------|-------------|
| O                                                         | 3.69489500  | 1.15743700  | 1.31271200  | H  | 1.29795500  | -3.35537100 | -0.10107800 |
| C                                                         | 1.80726300  | 2.38234900  | 0.57370500  | C  | -1.79294800 | -2.41621500 | -0.27253400 |
| C                                                         | 2.38348100  | 3.60620100  | 0.91391600  | H  | -0.26640600 | -1.22981100 | -1.51583100 |
| C                                                         | -0.16334600 | 3.43183900  | -0.08266800 | H  | -0.24096900 | -2.84312000 | -1.74110600 |
| C                                                         | 1.65226400  | 4.77489700  | 0.72953100  | C  | -2.87990800 | -1.41992800 | -0.80611400 |
| H                                                         | 3.39219300  | 3.58747000  | 1.30989900  | H  | -1.72771900 | -2.21612600 | 0.80325400  |
| H                                                         | -1.17167300 | 3.31033900  | -0.46203700 | H  | -3.03077400 | -1.58610700 | -1.88258600 |
| H                                                         | 2.08177200  | 5.74049500  | 0.97995900  | C  | -2.20107100 | -3.88383800 | -0.47223600 |
| C                                                         | 0.35694800  | 4.68751500  | 0.21438100  | H  | -2.35609600 | -4.10851200 | -1.53377700 |
| H                                                         | -0.24867300 | 5.57189000  | 0.04790000  | H  | -1.42191600 | -4.55505700 | -0.09596000 |
| N                                                         | 0.54657000  | 2.30594800  | 0.09977900  | H  | -3.12772100 | -4.12295900 | 0.05594400  |
| Pd                                                        | -0.02954200 | 0.30512300  | -0.30981300 | C  | -4.23623200 | -1.73607600 | -0.16417300 |
| C                                                         | -1.83156900 | -1.03291400 | -0.30347900 | O  | -5.18156200 | -2.20144800 | -0.76014400 |
| C                                                         | -2.06562300 | 0.23655100  | -0.41187600 | O  | -4.21708500 | -1.50857300 | 1.16566800  |
| C                                                         | -3.17464500 | 1.17325300  | -0.35462500 | C  | -5.48616200 | -1.64769700 | 1.82234300  |
| C                                                         | -4.17928800 | 1.14247700  | -1.34136600 | H  | -5.89494200 | -2.65012400 | 1.67291000  |
| C                                                         | -3.27581900 | 2.12211100  | 0.68111500  | H  | -5.29424700 | -1.46399800 | 2.87968500  |
| C                                                         | -5.25191200 | 2.02996100  | -1.28817400 | H  | -6.18711500 | -0.90901600 | 1.42637400  |
| H                                                         | -4.10670300 | 0.41892100  | -2.14739500 | N  | -2.41796900 | -0.06280000 | -0.54932900 |
| C                                                         | -4.35684100 | 3.00074900  | 0.73322400  | C  | -3.19683700 | 0.98920200  | -0.28505600 |
| H                                                         | -2.51122500 | 2.14794200  | 1.45131700  | O  | -4.43228700 | 1.07238000  | -0.27921500 |
| C                                                         | -5.34660800 | 2.96175000  | -0.25156500 | C  | -2.35671300 | 2.20903800  | 0.08747700  |
| H                                                         | -6.01809300 | 1.99171800  | -2.05733600 | C  | -2.98278000 | 3.41331800  | 0.39407700  |
| H                                                         | -4.42700000 | 3.71647800  | 1.54748100  | C  | -0.25309200 | 3.14525600  | 0.50343200  |
| H                                                         | -6.18504700 | 3.65072300  | -0.21131300 | C  | -2.21075000 | 4.51083700  | 0.76709100  |
| C                                                         | -2.44565500 | -2.25485300 | 0.22137800  | H  | -4.06501900 | 3.43721000  | 0.33060500  |
| C                                                         | -3.30092100 | -3.02841700 | -0.58102400 | H  | 0.81864800  | 2.98543900  | 0.52700500  |
| C                                                         | -2.20183000 | -2.65687500 | 1.54544100  | H  | -2.68165300 | 5.45864800  | 1.01066600  |
| C                                                         | -3.91071000 | -4.17072400 | -0.06394200 | C  | -0.82370100 | 4.37412200  | 0.82580200  |
| H                                                         | -3.49385900 | -2.72287500 | -1.60548100 | H  | -0.18298500 | 5.19986800  | 1.11508200  |
| C                                                         | -2.80873200 | -3.80412600 | 2.05551000  | N  | -1.00396200 | 2.09321200  | 0.14298200  |
| H                                                         | -1.54313300 | -2.05901800 | 2.16805300  | Pd | -0.38830200 | 0.18435800  | -0.44379400 |
| C                                                         | -3.66377500 | -4.56293200 | 1.25349600  | C  | 1.95144000  | -1.29786300 | -0.00629800 |
| H                                                         | -4.57836100 | -4.75496000 | -0.69054800 | C  | 1.62384800  | 0.00630600  | -0.20791200 |
| H                                                         | -2.61453900 | -4.10379200 | 3.08117700  | C  | 2.53429300  | 1.16149100  | -0.19141700 |
| H                                                         | -4.13602600 | -5.45548100 | 1.65318700  | C  | 3.23817300  | 1.51999400  | 0.97626100  |
|                                                           |             |             |             | C  | 2.66029400  | 1.99719700  | -1.32012300 |
| M2-6                                                      |             |             |             | C  | 4.04579700  | 2.65683300  | 1.00670300  |
| Thermal correction to Gibbs Free Energy= 0.410243 Hartree |             |             |             | H  | 3.14907300  | 0.89114600  | 1.85685900  |
| SCF Done: E(RM06) = -1507.01022718 Hartree                |             |             |             | C  | 3.47586000  | 3.12763200  | -1.29054800 |
| O 1                                                       |             |             |             | H  | 2.11057700  | 1.74613900  | -2.22327700 |
| C                                                         | 0.85211900  | -2.37314800 | 0.08295100  | C  | 4.17178800  | 3.46465800  | -0.12623600 |
| C                                                         | -0.36708600 | -2.17769100 | -0.87537500 | H  | 4.58083500  | 2.91074600  | 1.91785300  |
| H                                                         | 0.46744500  | -2.40594500 | 1.11149900  | H  | 3.56588800  | 3.74907800  | -2.17744400 |

|                                                           |             |             |             |                                                           |             |             |             |
|-----------------------------------------------------------|-------------|-------------|-------------|-----------------------------------------------------------|-------------|-------------|-------------|
| H                                                         | 4.80299300  | 4.34825300  | -0.10166300 | C                                                         | 0.93784700  | 4.61650800  | 0.44096000  |
| C                                                         | 3.34696000  | -1.78883300 | 0.19895100  | H                                                         | -1.15969400 | 4.34237400  | -0.11167500 |
| C                                                         | 3.62894800  | -2.74467700 | 1.19296500  | H                                                         | 3.10044000  | 1.98492500  | 0.57359700  |
| C                                                         | 4.41125300  | -1.34797700 | -0.60772200 | H                                                         | 0.87868000  | 5.69234800  | 0.57579800  |
| C                                                         | 4.92375100  | -3.22712800 | 1.38411500  | C                                                         | 2.14795500  | 3.94733400  | 0.63711200  |
| H                                                         | 2.82985800  | -3.10343900 | 1.83571400  | H                                                         | 3.04736600  | 4.47990800  | 0.92626300  |
| C                                                         | 5.70430400  | -1.83319300 | -0.42006400 | N                                                         | 1.09846500  | 1.87908200  | 0.09965600  |
| H                                                         | 4.21657500  | -0.62649300 | -1.39373000 | Pd                                                        | 0.96390500  | -0.15423900 | -0.31513500 |
| C                                                         | 5.96877100  | -2.77367500 | 0.57794100  | C                                                         | 3.30846300  | -1.71698400 | 0.17114800  |
| H                                                         | 5.11491900  | -3.95798900 | 2.16522500  | O                                                         | 3.01850300  | -0.49514100 | -0.02582500 |
| H                                                         | 6.50702900  | -1.48044600 | -1.06183900 | O                                                         | 2.45641300  | -2.65382900 | 0.09458600  |
| H                                                         | 6.97671800  | -3.15191600 | 0.72230900  | H                                                         | 1.30920000  | -2.13345800 | -0.35310200 |
|                                                           |             |             |             | C                                                         | 4.73868000  | -2.07518700 | 0.49921900  |
|                                                           |             |             |             | H                                                         | 5.35066700  | -1.18071900 | 0.61305600  |
|                                                           |             |             |             | H                                                         | 4.76302300  | -2.66922500 | 1.41659000  |
|                                                           |             |             |             | H                                                         | 5.14338200  | -2.69923000 | -0.30324000 |
| M <sub>TS1-γ</sub>                                        |             |             |             |                                                           |             |             |             |
| Thermal correction to Gibbs Free Energy= 0.282847 Hartree |             |             |             |                                                           |             |             |             |
| SCF Done: E(RM06) = -1196.84869384 Hartree                |             |             |             |                                                           |             |             |             |
| O 1                                                       |             |             |             |                                                           |             |             |             |
| C                                                         | -0.80532200 | -3.88215500 | 1.15008700  | M <sub>1-γ</sub>                                          |             |             |             |
| C                                                         | -1.40664100 | -2.50025900 | 0.86581000  | Thermal correction to Gibbs Free Energy= 0.402538 Hartree |             |             |             |
| H                                                         | -1.01318000 | -4.18450700 | 2.18172800  | SCF Done: E(RM06) = -1507.01955792 Hartree                |             |             |             |
| H                                                         | -1.23567400 | -4.64660200 | 0.49161100  | O 1                                                       |             |             |             |
| H                                                         | 0.28065700  | -3.89589100 | 1.01957200  | C                                                         | 1.36560200  | 3.41555400  | -2.19433900 |
| C                                                         | -1.30527700 | -2.06670800 | -0.61154100 | C                                                         | 2.11043400  | 2.24224500  | -1.54684800 |
| H                                                         | -2.46315300 | -2.51281900 | 1.15499100  | H                                                         | 1.74620600  | 4.36939200  | -1.81382300 |
| H                                                         | -0.92347400 | -1.74567500 | 1.49833700  | H                                                         | 1.49725500  | 3.41950000  | -3.28302000 |
| C                                                         | -1.91752600 | -0.66580600 | -0.89553500 | H                                                         | 0.29127300  | 3.39025700  | -1.98821900 |
| H                                                         | -1.88891500 | -2.78780800 | -1.20258200 | C                                                         | 1.77196500  | 0.86394600  | -2.15312000 |
| H                                                         | -2.08849200 | -0.58693100 | -1.97834700 | H                                                         | 3.18685600  | 2.41452900  | -1.65644500 |
| C                                                         | 0.14410600  | -2.08029200 | -1.14334800 | H                                                         | 1.91499400  | 2.22357300  | -0.46827100 |
| H                                                         | 0.47904800  | -3.12041900 | -1.24815300 | C                                                         | 2.53812000  | -0.30866400 | -1.47600400 |
| H                                                         | 0.20938400  | -1.67513400 | -2.15966600 | H                                                         | 2.07293000  | 0.89508800  | -3.21263000 |
| C                                                         | -3.31535300 | -0.51670800 | -0.28810800 | H                                                         | 2.50406500  | -1.17437800 | -2.15238900 |
| O                                                         | -4.31974900 | -0.87312800 | -0.86543200 | C                                                         | 0.27328300  | 0.51224500  | -2.08037200 |
| O                                                         | -3.30346900 | -0.02139200 | 0.96356800  | H                                                         | -0.38292900 | 1.33299600  | -2.37583100 |
| C                                                         | -4.59934200 | 0.18374200  | 1.54584800  | H                                                         | 0.04257100  | -0.36179800 | -2.70187300 |
| H                                                         | -5.15844100 | -0.75429600 | 1.59228900  | C                                                         | 4.03244200  | -0.02847100 | -1.31143200 |
| H                                                         | -4.41416200 | 0.57042100  | 2.54808000  | O                                                         | 4.84970100  | -0.27585100 | -2.17259800 |
| H                                                         | -5.16690000 | 0.90722200  | 0.95546000  | O                                                         | 4.33561100  | 0.58387100  | -0.14861900 |
| N                                                         | -0.95867000 | 0.33935200  | -0.46649200 | C                                                         | 5.73553100  | 0.80534200  | 0.06972500  |
| C                                                         | -1.25757700 | 1.65495000  | -0.49495900 | H                                                         | 6.16126000  | 1.42739300  | -0.72208000 |
| O                                                         | -2.34303000 | 2.16541200  | -0.78584800 | H                                                         | 5.80832400  | 1.30900800  | 1.03401100  |
| C                                                         | -0.07883700 | 2.51231900  | -0.09087100 | H                                                         | 6.26854500  | -0.14840800 | 0.09626600  |
| C                                                         | -0.19099800 | 3.88938300  | 0.06733700  | N                                                         | 1.82221300  | -0.61023700 | -0.23859200 |
| C                                                         | 2.19360600  | 2.56755000  | 0.45102000  | C                                                         | 2.30105900  | -1.52808100 | 0.62464000  |

|                                                           |             |             |             |    |             |             |             |
|-----------------------------------------------------------|-------------|-------------|-------------|----|-------------|-------------|-------------|
| O                                                         | 3.37870900  | -2.12951400 | 0.54320900  | H  | -0.18443500 | -4.56934100 | 1.02245000  |
| C                                                         | 1.37899000  | -1.78949200 | 1.80498400  | H  | 0.99278800  | -3.27274500 | 1.27154900  |
| C                                                         | 1.81349300  | -2.59767900 | 2.85476700  | C  | -1.22236300 | -2.33067700 | -0.35026600 |
| C                                                         | -0.67978700 | -1.46535800 | 2.82542000  | H  | -2.05607200 | -2.95228200 | 1.53571100  |
| C                                                         | 0.95627700  | -2.82853700 | 3.92809000  | H  | -0.90765100 | -1.63992300 | 1.67832600  |
| H                                                         | 2.80955600  | -3.02030500 | 2.78901600  | C  | -2.47695700 | -1.48862300 | -0.73845800 |
| H                                                         | -1.66052800 | -1.00190400 | 2.76244900  | H  | -1.35198900 | -3.31256500 | -0.83269200 |
| H                                                         | 1.27125100  | -3.45045100 | 4.76101000  | H  | -2.60281100 | -1.57229000 | -1.82905200 |
| C                                                         | -0.31466000 | -2.25155600 | 3.91689000  | C  | 0.06768700  | -1.74435800 | -1.01236400 |
| H                                                         | -1.01427700 | -2.40650700 | 4.73148300  | H  | 0.77184800  | -2.56229000 | -1.10683300 |
| N                                                         | 0.14679900  | -1.23729700 | 1.79689900  | H  | -0.12503900 | -1.36990700 | -2.02132000 |
| Pd                                                        | -0.12825800 | -0.14245600 | -0.18042100 | C  | -3.76302600 | -2.11726500 | -0.18984200 |
| C                                                         | -2.32538500 | -0.16923800 | -0.43596100 | O  | -4.35442600 | -3.00932300 | -0.76095000 |
| C                                                         | -2.05242200 | 0.92109500  | 0.10960400  | O  | -4.13716400 | -1.61458000 | 1.00155600  |
| C                                                         | -2.18285000 | 2.22181300  | 0.70560300  | C  | -5.38297800 | -2.11638900 | 1.50719400  |
| C                                                         | -1.07567200 | 2.91799300  | 1.22548600  | H  | -5.34588900 | -3.20200200 | 1.62985400  |
| C                                                         | -3.45987100 | 2.81832400  | 0.77574700  | H  | -5.52946800 | -1.62541000 | 2.46937000  |
| C                                                         | -1.24379000 | 4.17615300  | 1.79913900  | H  | -6.19586600 | -1.86373200 | 0.82202200  |
| H                                                         | -0.09330800 | 2.46111700  | 1.16942100  | N  | -2.23599800 | -0.11934000 | -0.35577400 |
| C                                                         | -3.61719700 | 4.07523400  | 1.35123000  | C  | -3.14011400 | 0.84801800  | -0.54100100 |
| H                                                         | -4.31804700 | 2.28823500  | 0.37470800  | O  | -4.32218100 | 0.75099700  | -0.89808600 |
| C                                                         | -2.51126600 | 4.75878400  | 1.86490700  | C  | -2.53831000 | 2.21432400  | -0.25548900 |
| H                                                         | -0.38079800 | 4.70335100  | 2.19479100  | C  | -3.34268600 | 3.35087200  | -0.24466700 |
| H                                                         | -4.60518900 | 4.52393100  | 1.39797100  | C  | -0.63514200 | 3.49501600  | 0.16241200  |
| H                                                         | -2.63787700 | 5.74017100  | 2.31225700  | C  | -2.76291000 | 4.59444500  | -0.01002700 |
| C                                                         | -3.06143100 | -1.24647900 | -1.03827400 | H  | -4.40148100 | 3.21084400  | -0.43190400 |
| C                                                         | -4.45431500 | -1.10831300 | -1.21740400 | H  | 0.43992400  | 3.50201000  | 0.30625200  |
| C                                                         | -2.43600600 | -2.43710900 | -1.45302500 | H  | -3.37164100 | 5.49370700  | 0.00706100  |
| C                                                         | -5.19359400 | -2.13565900 | -1.79503000 | C  | -1.38442800 | 4.66815200  | 0.19612000  |
| H                                                         | -4.94322700 | -0.19172700 | -0.90256200 | H  | -0.88733400 | 5.61541200  | 0.37541600  |
| C                                                         | -3.18477300 | -3.45966700 | -2.03086300 | N  | -1.20005200 | 2.29599200  | -0.05156100 |
| H                                                         | -1.36487200 | -2.54399500 | -1.31732900 | Pd | -0.25958100 | 0.41184300  | -0.23077900 |
| C                                                         | -4.56288900 | -3.31429600 | -2.20387400 | C  | 1.74602900  | -0.77420200 | -0.34700700 |
| H                                                         | -6.26481800 | -2.01617300 | -1.92857400 | C  | 1.74060100  | 0.51199500  | -0.13320400 |
| H                                                         | -2.68923300 | -4.37250800 | -2.34769300 | C  | 2.74600300  | 1.54515300  | 0.08291000  |
| H                                                         | -5.14307600 | -4.11348600 | -2.65545800 | C  | 2.67513200  | 2.39216000  | 1.20552900  |
|                                                           |             |             |             | C  | 3.80246800  | 1.72426700  | -0.83043200 |
|                                                           |             |             |             | C  | 3.64012800  | 3.37713200  | 1.41425800  |
| MTS2-y                                                    |             |             |             | H  | 1.86870700  | 2.25427200  | 1.92028200  |
| Thermal correction to Gibbs Free Energy= 0.407000 Hartree |             |             |             | C  | 4.75621700  | 2.71874300  | -0.62336500 |
| SCF Done: E(RM06) = 1506.96936607 Hartree                 |             |             |             | H  | 3.86443800  | 1.07778900  | -1.70013700 |
| 0 1                                                       |             |             |             | C  | 4.68103000  | 3.54785200  | 0.49885700  |
| C                                                         | -0.01283500 | -3.61334000 | 1.53177800  | H  | 3.57843100  | 4.01241600  | 2.29347800  |
| C                                                         | -1.09271100 | -2.59004000 | 1.16394700  | H  | 5.56386600  | 2.84445100  | -1.33901700 |
| H                                                         | -0.02227600 | -3.81003800 | 2.60897000  |    |             |             |             |



|                                                           |             |             |             |                                                           |             |             |             |
|-----------------------------------------------------------|-------------|-------------|-------------|-----------------------------------------------------------|-------------|-------------|-------------|
| H                                                         | 5.42773600  | 4.32014000  | 0.65830500  | C                                                         | -4.94282600 | 2.67694700  | -0.59062400 |
| C                                                         | 2.79588600  | -1.80227200 | -0.24777500 | H                                                         | -5.16178300 | 0.67851600  | -1.44418300 |
| C                                                         | 3.50148900  | -1.94198000 | 0.96080500  | H                                                         | -2.04638200 | 3.66791700  | 0.88398900  |
| C                                                         | 3.17958900  | -2.59120100 | -1.34731100 | H                                                         | -5.94128800 | 3.01970700  | -0.84584900 |
| C                                                         | 4.55587800  | -2.84853500 | 1.06614400  | C                                                         | -4.05355900 | 3.52280700  | 0.07608600  |
| H                                                         | 3.21222000  | -1.33561000 | 1.81300700  | H                                                         | -4.33402300 | 4.53297600  | 0.35477300  |
| C                                                         | 4.23417700  | -3.49630400 | -1.23720700 | N                                                         | -2.38846900 | 1.80425000  | 0.06231000  |
| H                                                         | 2.66466600  | -2.47760600 | -2.29672200 | Pd                                                        | -0.42829400 | 0.86843900  | 0.16825200  |
| C                                                         | 4.92352000  | -3.63076700 | -0.03011200 | C                                                         | 2.13592100  | -0.85196000 | -0.30647200 |
| H                                                         | 5.08732100  | -2.94591400 | 2.00842300  | C                                                         | 1.45445300  | 0.24767000  | 0.03081100  |
| H                                                         | 4.52243200  | -4.09171000 | -2.09869900 | C                                                         | 1.74459700  | 1.66203000  | 0.19154700  |
| H                                                         | 5.74259400  | -4.33883400 | 0.05434800  | C                                                         | 1.21097500  | 2.31576600  | 1.34213500  |
|                                                           |             |             |             | C                                                         | 2.25682100  | 2.47385100  | -0.86300600 |
|                                                           |             |             |             | C                                                         | 1.20712700  | 3.72485100  | 1.42450800  |
| M2-γ                                                      |             |             |             | H                                                         | 0.94442300  | 1.72591700  | 2.21514000  |
| Thermal correction to Gibbs Free Energy= 0.411742 Hartree |             |             |             | C                                                         | 2.26654300  | 3.84992700  | -0.74963400 |
| SCF Done: E(RM06) = -1507.03913396 Hartree                |             |             |             | H                                                         | 2.64900600  | 1.98395800  | -1.74812900 |
| O 1                                                       |             |             |             | C                                                         | 1.72955700  | 4.48387100  | 0.39131300  |
| C                                                         | 1.35345300  | -3.16245400 | 2.23485200  | H                                                         | 0.82180300  | 4.20508100  | 2.31946600  |
| C                                                         | 0.17576800  | -2.44796300 | 1.56086700  | H                                                         | 2.68300300  | 4.45314700  | -1.55137200 |
| H                                                         | 1.27848200  | -3.08873500 | 3.32503300  | H                                                         | 1.73999100  | 5.56764400  | 0.46032900  |
| H                                                         | 1.37517900  | -4.22841900 | 1.97764400  | C                                                         | 3.62932800  | -0.83159400 | -0.36684300 |
| H                                                         | 2.31693700  | -2.73085600 | 1.94420700  | C                                                         | 4.39500600  | -0.12726400 | 0.57959100  |
| C                                                         | 0.15186700  | -2.61060700 | 0.02851700  | C                                                         | 4.31412600  | -1.53036200 | -1.37866900 |
| H                                                         | -0.76325500 | -2.84140000 | 1.96301900  | C                                                         | 5.78691700  | -0.10758400 | 0.50853600  |
| H                                                         | 0.19349500  | -1.38573100 | 1.82237000  | H                                                         | 3.89065500  | 0.39089700  | 1.38880900  |
| C                                                         | -1.16683000 | -2.12827400 | -0.64975500 | C                                                         | 5.70657900  | -1.50629000 | -1.45254600 |
| H                                                         | 0.12410400  | -3.69110000 | -0.16868200 | H                                                         | 3.75277700  | -2.08383300 | -2.12502200 |
| H                                                         | -1.04949100 | -2.29876100 | -1.72915300 | C                                                         | 6.45057400  | -0.79492600 | -0.50975600 |
| C                                                         | 1.45745700  | -2.16235900 | -0.68618000 | H                                                         | 6.35480300  | 0.43670100  | 1.25814100  |
| H                                                         | 2.19244200  | -2.95743800 | -0.52557600 | H                                                         | 6.21038100  | -2.04543500 | -2.25007500 |
| H                                                         | 1.26487100  | -2.16080500 | -1.76865000 | H                                                         | 7.53532200  | -0.78235100 | -0.56346400 |
| C                                                         | -2.26457000 | -3.14200300 | -0.26698100 |                                                           |             |             |             |
| O                                                         | -2.38634400 | -4.21288900 | -0.82175600 |                                                           |             |             |             |
| O                                                         | -2.99303300 | -2.77682900 | 0.81023900  | M <sup>TS1</sup> -γ'                                      |             |             |             |
| C                                                         | -4.05584200 | -3.67863400 | 1.14872300  | Thermal correction to Gibbs Free Energy= 0.405778 Hartree |             |             |             |
| H                                                         | -3.66844500 | -4.67978900 | 1.35432000  | SCF Done: E(RM06) = -1506.97285077 Hartree                |             |             |             |
| H                                                         | -4.52794100 | -3.25938700 | 2.03778700  | O 1                                                       |             |             |             |
| H                                                         | -4.77372400 | -3.73791300 | 0.32661100  | C                                                         | 0.21147300  | -2.39487400 | -2.04779300 |
| N                                                         | -1.56302000 | -0.74735700 | -0.40977400 | C                                                         | 0.00831400  | -2.31215700 | -0.52664700 |
| C                                                         | -2.77821700 | -0.41953000 | -0.89769100 | H                                                         | 1.26440800  | -2.58355200 | -2.28023300 |
| O                                                         | -3.54101200 | -1.17164300 | -1.52396100 | H                                                         | -0.36769700 | -3.22098400 | -2.47943200 |
| C                                                         | -3.24301400 | 0.98264300  | -0.57709600 | H                                                         | -0.08128900 | -1.47709600 | -2.56458800 |
| C                                                         | -4.53096600 | 1.38981900  | -0.92403500 | C                                                         | -1.44353100 | -2.06283900 | -0.03065600 |
| C                                                         | -2.78062300 | 3.04727500  | 0.37930600  | H                                                         | 0.24935300  | -3.31344500 | -0.13723200 |

|                                                           |             |             |             |    |             |             |             |
|-----------------------------------------------------------|-------------|-------------|-------------|----|-------------|-------------|-------------|
| C                                                         | -2.01012000 | -0.72042900 | -0.55372600 | H  | 0.09855700  | 0.52119400  | -4.08421600 |
| H                                                         | -1.39383900 | -1.97111100 | 1.06133400  | H  | 0.37559100  | -0.95389500 | -3.14993700 |
| H                                                         | -2.29351800 | -0.81950400 | -1.61021600 | C  | 1.89999900  | 1.12585100  | -1.88538500 |
| C                                                         | -2.36799500 | -3.24516500 | -0.36954400 | H  | -0.14964800 | 1.85016100  | -1.96951700 |
| H                                                         | -2.46540000 | -3.38421000 | -1.45104200 | C  | 2.61394800  | -0.16581200 | -1.41169000 |
| H                                                         | -1.97394100 | -4.17366700 | 0.05697700  | H  | 2.06383600  | 1.86470900  | -1.09082800 |
| H                                                         | -3.37465900 | -3.09026600 | 0.02763700  | H  | 2.68443600  | -0.88757000 | -2.23676900 |
| C                                                         | -3.31662900 | -0.37854900 | 0.16949200  | C  | 2.48372300  | 1.69531900  | -3.18940700 |
| O                                                         | -4.41708100 | -0.61271100 | -0.28034800 | H  | 2.40929600  | 0.97814900  | -4.01282200 |
| O                                                         | -3.09955600 | 0.11980100  | 1.40353400  | H  | 1.95144800  | 2.60610600  | -3.48461700 |
| C                                                         | -4.28467500 | 0.48903500  | 2.12417100  | H  | 3.54211800  | 1.94522200  | -3.07112100 |
| H                                                         | -4.94407700 | -0.37279800 | 2.25541100  | C  | 4.06478600  | 0.13026400  | -1.03090500 |
| H                                                         | -3.93998700 | 0.85912500  | 3.08991100  | O  | 5.01225900  | -0.06882100 | -1.76035100 |
| H                                                         | -4.82507400 | 1.27075400  | 1.58465700  | O  | 4.16308400  | 0.74018700  | 0.17100700  |
| N                                                         | -0.97176800 | 0.27986100  | -0.38860900 | C  | 5.50406200  | 1.00818900  | 0.60239000  |
| C                                                         | -1.23686700 | 1.59320200  | -0.53076300 | H  | 6.02110200  | 1.65657600  | -0.11001900 |
| O                                                         | -2.33195600 | 2.10440800  | -0.78630700 | H  | 5.41139300  | 1.50014500  | 1.57114300  |
| C                                                         | -0.00954900 | 2.44964000  | -0.32024700 | H  | 6.06227800  | 0.07371400  | 0.70053200  |
| C                                                         | -0.06343100 | 3.83788100  | -0.38207400 | N  | 1.79959000  | -0.69213100 | -0.32332800 |
| C                                                         | 2.28249800  | 2.49047300  | 0.12881300  | C  | 2.27079300  | -1.65391500 | 0.49018900  |
| C                                                         | 1.10753600  | 4.56488000  | -0.17490800 | O  | 3.39062900  | -2.17937400 | 0.44103300  |
| H                                                         | -1.02242600 | 4.29834900  | -0.59172900 | C  | 1.28697800  | -2.07804300 | 1.56861200  |
| H                                                         | 3.16885800  | 1.89491200  | 0.31940800  | C  | 1.67020900  | -3.03110500 | 2.51169300  |
| H                                                         | 1.09522500  | 5.64991700  | -0.21588500 | C  | -0.81146900 | -1.87554200 | 2.53606700  |
| C                                                         | 2.29824800  | 3.88284400  | 0.08473200  | C  | 0.76300000  | -3.40575800 | 3.49995800  |
| H                                                         | 3.22903800  | 4.41441100  | 0.24993800  | H  | 2.66914300  | -3.44495600 | 2.43453500  |
| N                                                         | 1.14841400  | 1.80377700  | -0.06865400 | H  | -1.78332800 | -1.39070400 | 2.50185100  |
| Pd                                                        | 0.91884000  | -0.26705400 | -0.09410900 | H  | 1.03639900  | -4.14483100 | 4.24749800  |
| C                                                         | 3.22641600  | -1.77500600 | 0.66308000  | C  | -0.50266200 | -2.81761700 | 3.51594200  |
| O                                                         | 2.96610200  | -0.59593900 | 0.26412400  | H  | -1.23976900 | -3.07964500 | 4.26768700  |
| O                                                         | 2.34634000  | -2.68178100 | 0.75049100  | N  | 0.06077200  | -1.51412500 | 1.58662000  |
| H                                                         | 1.19395900  | -2.17883500 | 0.23644300  | Pd | -0.10929500 | -0.08139400 | -0.19392400 |
| C                                                         | 4.64763300  | -2.10940600 | 1.05071200  | C  | -2.30892000 | 0.17108800  | -0.27302900 |
| H                                                         | 4.67154600  | -2.40642400 | 2.10328600  | C  | -1.84933600 | 1.20381800  | 0.26021800  |
| H                                                         | 4.99064800  | -2.96590700 | 0.46394200  | C  | -1.75574700 | 2.50454700  | 0.86374600  |
| H                                                         | 5.30900100  | -1.25804800 | 0.89149800  | C  | -0.54009100 | 3.00690700  | 1.36482100  |
|                                                           |             |             |             | C  | -2.91723900 | 3.29972900  | 0.96276700  |
|                                                           |             |             |             | C  | -0.49081000 | 4.27047100  | 1.94888700  |
| M1-v'                                                     |             |             |             | H  | 0.35337200  | 2.39591700  | 1.28726100  |
| Thermal correction to Gibbs Free Energy= 0.403225 Hartree |             |             |             | C  | -2.85754000 | 4.56007300  | 1.54914000  |
| SCF Done: E(RM06) = -1507.02452645 Hartree                |             |             |             | H  | -3.85715300 | 2.92027600  | 0.57427700  |
| 0 1                                                       |             |             |             | C  | -1.64555000 | 5.05030200  | 2.04392500  |
| C                                                         | -0.11057900 | 0.02698900  | -3.12468000 | H  | 0.45348400  | 4.64677300  | 2.33094400  |
| C                                                         | 0.36896300  | 0.88480800  | -1.95507000 | H  | -3.75835800 | 5.16287700  | 1.61848200  |
| H                                                         | -1.19096700 | -0.13660900 | -3.07871700 |    |             |             |             |

|                                                           |             |             |             |                                                           |             |             |             |
|-----------------------------------------------------------|-------------|-------------|-------------|-----------------------------------------------------------|-------------|-------------|-------------|
| H                                                         | -1.60256200 | 6.03503700  | 2.49975200  | C                                                         | -2.80024200 | 4.62648400  | 0.33720400  |
| C                                                         | -3.23814600 | -0.79614700 | -0.78989200 | H                                                         | -4.42950400 | 3.17457800  | 0.21095500  |
| C                                                         | -4.61341300 | -0.48091500 | -0.81981800 | H                                                         | 0.44757600  | 3.67101800  | 0.03871500  |
| C                                                         | -2.81773700 | -2.05335200 | -1.26344300 | H                                                         | -3.43189000 | 5.49715500  | 0.48704300  |
| C                                                         | -5.53501400 | -1.40111900 | -1.30936400 | C                                                         | -1.41183800 | 4.76002900  | 0.28090600  |
| H                                                         | -4.94533000 | 0.48700500  | -0.45752700 | H                                                         | -0.93025000 | 5.72686300  | 0.38044500  |
| C                                                         | -3.74815100 | -2.96791300 | -1.75162500 | N                                                         | -1.17882500 | 2.39998700  | -0.04090700 |
| H                                                         | -1.76048600 | -2.29617100 | -1.24460900 | Pd                                                        | -0.19543800 | 0.54027800  | -0.32633100 |
| C                                                         | -5.10709900 | -2.64715000 | -1.77691400 | C                                                         | 1.62337800  | -0.77533500 | -0.38343200 |
| H                                                         | -6.59045600 | -1.14541700 | -1.32760200 | C                                                         | 1.81379200  | 0.52119000  | -0.26936400 |
| H                                                         | -3.40961000 | -3.93366800 | -2.11495600 | C                                                         | 2.93600100  | 1.40354800  | -0.00677100 |
| H                                                         | -5.82926400 | -3.36219800 | -2.15957900 | C                                                         | 2.83670200  | 2.42508000  | 0.95869200  |
|                                                           |             |             |             | C                                                         | 4.14434500  | 1.26935200  | -0.71951200 |
|                                                           |             |             |             | C                                                         | 3.91345400  | 3.27226400  | 1.21184500  |
| <sup>M</sup> TS2-γ'                                       |             |             |             | H                                                         | 1.91474500  | 2.52504200  | 1.52368500  |
| Thermal correction to Gibbs Free Energy= 0.405778 Hartree |             |             |             | C                                                         | 5.21295600  | 2.12794300  | -0.47274500 |
| SCF Done: E(RM06) = -1506.97285077 Hartree                |             |             |             | H                                                         | 4.23026000  | 0.48943000  | -1.46950500 |
| O 1                                                       |             |             |             | C                                                         | 5.10352500  | 3.13149200  | 0.49348900  |
| C                                                         | -0.16387300 | -0.98240600 | -2.76922800 | H                                                         | 3.82445300  | 4.04444500  | 1.97092800  |
| C                                                         | 0.09737300  | -1.55126300 | -1.36792600 | H                                                         | 6.13600700  | 2.01197600  | -1.03382000 |
| H                                                         | 0.74126500  | -0.51769600 | -3.16858100 | H                                                         | 5.93921700  | 3.79815500  | 0.68502800  |
| H                                                         | -0.43274200 | -1.80957600 | -3.44002000 | C                                                         | 2.37766800  | -1.93379100 | 0.13828000  |
| H                                                         | -0.96831500 | -0.24600300 | -2.80256200 | C                                                         | 2.29195200  | -2.27259100 | 1.49840500  |
| C                                                         | -1.10811500 | -2.22926900 | -0.62973900 | C                                                         | 3.20295500  | -2.70177500 | -0.70057200 |
| H                                                         | 0.81123200  | -2.36048200 | -1.50492400 | C                                                         | 3.01914900  | -3.34968400 | 2.00619600  |
| C                                                         | -2.44165700 | -1.41652400 | -0.66756800 | H                                                         | 1.65414400  | -1.68357000 | 2.15037700  |
| H                                                         | -0.82516700 | -2.32337200 | 0.42482900  | C                                                         | 3.93473400  | -3.77287700 | -0.18805700 |
| H                                                         | -2.88770300 | -1.50500500 | -1.66894400 | H                                                         | 3.27838300  | -2.44696900 | -1.75435300 |
| C                                                         | -1.30655000 | -3.64980200 | -1.19688600 | C                                                         | 3.84251500  | -4.10153500 | 1.16601700  |
| H                                                         | -1.51753100 | -3.62511300 | -2.27154700 | H                                                         | 2.94322200  | -3.59943000 | 3.06062900  |
| H                                                         | -0.40984500 | -4.25721400 | -1.03883100 | H                                                         | 4.57769500  | -4.34981000 | -0.84667100 |
| H                                                         | -2.14931600 | -4.15180700 | -0.71599000 | H                                                         | 4.40946100  | -4.93820300 | 1.56364600  |
| C                                                         | -3.47237600 | -2.07106100 | 0.26134700  |                                                           |             |             |             |
| O                                                         | -4.31311900 | -2.86425700 | -0.10563700 | <sup>M</sup> 2-γ'                                         |             |             |             |
| O                                                         | -3.29094800 | -1.71821600 | 1.55003700  | Thermal correction to Gibbs Free Energy= 0.412264 Hartree |             |             |             |
| C                                                         | -4.25242300 | -2.26026900 | 2.46711100  | SCF Done: E(RM06) = -1507.03769262 Hartree                |             |             |             |
| H                                                         | -4.23332500 | -3.35330100 | 2.45034800  | O 1                                                       |             |             |             |
| H                                                         | -3.96626600 | -1.88638800 | 3.45039400  | C                                                         | 1.11562900  | -1.89811300 | -2.19949600 |
| H                                                         | -5.25721200 | -1.91972500 | 2.20540700  | C                                                         | 1.48424300  | -2.02382500 | -0.70504100 |
| N                                                         | -2.15849200 | -0.03864300 | -0.34440900 | H                                                         | 1.99314300  | -1.62445600 | -2.79376400 |
| C                                                         | -3.11928400 | 0.87711300  | -0.20418900 | H                                                         | 0.73595300  | -2.84794400 | -2.59119500 |
| O                                                         | -4.34877700 | 0.72166300  | -0.23631300 | H                                                         | 0.35427300  | -1.13028000 | -2.35631200 |
| C                                                         | -2.52704900 | 2.26219600  | 0.00082400  | C                                                         | 0.30087600  | -2.50701900 | 0.21855600  |
| C                                                         | -3.36142000 | 3.36086900  | 0.19188300  | H                                                         | 2.23955500  | -2.81345200 | -0.64077400 |
| C                                                         | -0.63475400 | 3.62049900  | 0.08996400  |                                                           |             |             |             |

|    |             |             |             |                                                           |             |             |             |
|----|-------------|-------------|-------------|-----------------------------------------------------------|-------------|-------------|-------------|
| C  | -1.12230700 | -2.27004400 | -0.36089100 | C                                                         | 5.72442100  | 0.04821300  | 0.91555600  |
| H  | 0.35076700  | -1.93629600 | 1.15182500  | H                                                         | 3.75270100  | 0.55617600  | 1.59338800  |
| H  | -1.18224100 | -2.70537500 | -1.36473700 | C                                                         | 5.84288400  | -1.42525500 | -0.98544100 |
| C  | 0.53514900  | -3.99244000 | 0.56311600  | H                                                         | 3.97444200  | -2.04923100 | -1.82277700 |
| H  | 0.45459900  | -4.62859900 | -0.32524900 | C                                                         | 6.48908700  | -0.67057400 | -0.00576700 |
| H  | 1.53898200  | -4.11755200 | 0.98100600  | H                                                         | 6.21243200  | 0.62464000  | 1.69675400  |
| H  | -0.17842400 | -4.37211500 | 1.29689300  | H                                                         | 6.42355700  | -1.99276200 | -1.70745900 |
| C  | -2.15029400 | -3.10086600 | 0.43000600  | H                                                         | 7.57379600  | -0.65039900 | 0.04568900  |
| O  | -2.48825400 | -4.22463400 | 0.13132500  |                                                           |             |             |             |
| O  | -2.56851600 | -2.47355000 | 1.55340600  |                                                           |             |             |             |
| C  | -3.55138800 | -3.19286600 | 2.31092300  | 2-Ni                                                      |             |             |             |
| H  | -3.15838100 | -4.15703000 | 2.64468900  | Thermal correction to Gibbs Free Energy= 0.431324 Hartree |             |             |             |
| H  | -3.78818100 | -2.55975100 | 3.16664700  | SCF Done: E(RM06) = -2053.84402323 Hartree                |             |             |             |
| H  | -4.44362800 | -3.36831100 | 1.70443800  | O 1                                                       |             |             |             |
| N  | -1.50419400 | -0.85535400 | -0.41348400 | Pd                                                        | -2.55045200 | -0.76631400 | 0.63674100  |
| C  | -2.77508000 | -0.64120800 | -0.81268400 | O                                                         | -1.03283900 | -0.26248200 | -2.14898700 |
| O  | -3.56633100 | -1.51019500 | -1.21092300 | C                                                         | -2.19415900 | -0.78245900 | -2.28798600 |
| C  | -3.26849900 | 0.78202300  | -0.69104500 | O                                                         | -3.00198400 | -1.13013800 | -1.37755900 |
| C  | -4.55290300 | 1.11596800  | -1.11991800 | C                                                         | -2.63547800 | -1.01301500 | -3.71905600 |
| C  | -2.88017000 | 2.95221000  | 0.03717800  | H                                                         | -2.03291100 | -1.81872100 | -4.15032900 |
| C  | -4.99812800 | 2.42468500  | -0.95742600 | H                                                         | -3.68965600 | -1.28650500 | -3.75537300 |
| H  | -5.15695300 | 0.33176400  | -1.56116900 | H                                                         | -2.45197100 | -0.11317500 | -4.31125900 |
| H  | -2.17853400 | 3.64154800  | 0.49746100  | C                                                         | -4.74176700 | 0.91701200  | 0.96985100  |
| H  | -5.99310700 | 2.71299000  | -1.28366200 | O                                                         | -3.50205200 | 1.00210900  | 0.51943100  |
| C  | -4.14812900 | 3.36205900  | -0.36601700 | O                                                         | -5.24443200 | -0.10430400 | 1.41747900  |
| H  | -4.45634600 | 4.39149000  | -0.21742800 | C                                                         | -5.49367100 | 2.23699700  | 0.87301000  |
| N  | -2.45376300 | 1.69001300  | -0.12129100 | H                                                         | -6.49558100 | 2.11788800  | 1.28651700  |
| Pd | -0.47438900 | 0.83692700  | 0.15622900  | H                                                         | -4.95788800 | 3.01865300  | 1.42026100  |
| C  | 2.17178600  | -0.75085000 | -0.20474600 | H                                                         | -5.56325000 | 2.55277900  | -0.17278100 |
| C  | 1.44331900  | 0.31444100  | 0.15087900  | C                                                         | -0.38278300 | 0.08446400  | 2.40610800  |
| C  | 1.65849800  | 1.73450800  | 0.35641000  | O                                                         | 0.37709600  | 0.15043600  | 1.37133700  |
| C  | 0.99749800  | 2.35148300  | 1.46029100  | O                                                         | -1.60868400 | -0.20689700 | 2.42883300  |
| C  | 2.22708200  | 2.58071200  | -0.64136600 | C                                                         | -0.51800900 | -2.80442300 | 0.25543500  |
| C  | 0.92531200  | 3.75790200  | 1.55342200  | O                                                         | -1.63336800 | -2.60226100 | 0.81414000  |
| H  | 0.67841000  | 1.74011600  | 2.30021000  | O                                                         | 0.13857900  | -1.93402800 | -0.40145500 |
| C  | 2.16778500  | 3.95443500  | -0.51622700 | C                                                         | 0.08471600  | -4.18667800 | 0.35123500  |
| H  | 2.71622200  | 2.11814200  | -1.49227100 | H                                                         | -0.12848000 | -4.73068500 | -0.57549800 |
| C  | 1.50450800  | 4.55104200  | 0.57745200  | H                                                         | 1.16783700  | -4.10382900 | 0.46162300  |
| H  | 0.44094700  | 4.21028400  | 2.41405500  | H                                                         | -0.35656600 | -4.73471400 | 1.18405100  |
| H  | 2.62698300  | 4.58434500  | -1.27284000 | C                                                         | 0.28788200  | 0.37981300  | 3.73120800  |
| H  | 1.46174200  | 5.63338400  | 0.65626400  | H                                                         | -0.44411500 | 0.37565900  | 4.53807400  |
| C  | 3.66234100  | -0.72638500 | -0.13795300 | H                                                         | 1.05100000  | -0.38105200 | 3.92211800  |
| C  | 4.33319300  | 0.01736500  | 0.85199600  | H                                                         | 0.79213500  | 1.34893400  | 3.68330200  |
| C  | 4.44990500  | -1.45852900 | -1.04731300 | C                                                         | 1.11712200  | 2.44272400  | -1.08969300 |
|    |             |             |             | C                                                         | 1.17138000  | 3.79500400  | -1.43436500 |

|                                                           |             |             |             |   |             |             |             |
|-----------------------------------------------------------|-------------|-------------|-------------|---|-------------|-------------|-------------|
| C                                                         | 0.01608600  | 4.56692200  | -1.37518300 | C | -2.62102400 | -2.89120200 | -2.80581900 |
| C                                                         | -1.17494100 | 3.95749800  | -0.98851000 | H | -3.60243100 | -3.22520700 | -2.46909000 |
| C                                                         | -1.17497400 | 2.59874400  | -0.68806300 | H | -2.69322300 | -2.37943600 | -3.76776100 |
| H                                                         | 2.12435500  | 4.20017200  | -1.75145700 | H | -1.97587300 | -3.76563900 | -2.94228800 |
| H                                                         | 0.04563200  | 5.62192500  | -1.63007200 | C | -4.20997200 | 0.40626200  | 1.10830400  |
| H                                                         | -2.10444600 | 4.51236000  | -0.92509200 | O | -3.05366500 | 0.56362800  | 0.49193300  |
| H                                                         | -2.08785900 | 2.08750100  | -0.39466500 | O | -4.48672000 | -0.50953400 | 1.86942900  |
| N                                                         | -0.04965900 | 1.85688100  | -0.73436900 | C | -5.19801500 | 1.51999400  | 0.77260700  |
| C                                                         | 2.42637700  | 1.67734200  | -1.19268300 | H | -6.15315900 | 1.32066900  | 1.25959800  |
| O                                                         | 3.21510600  | 1.99108400  | -2.07859600 | H | -4.80542500 | 2.48314600  | 1.11355700  |
| C                                                         | 3.89983100  | -0.06893100 | -0.26901500 | H | -5.34223100 | 1.58924100  | -0.31009100 |
| C                                                         | 4.71086800  | 0.03991300  | 1.04172800  | C | -0.41731100 | 1.22707300  | 2.67535500  |
| H                                                         | 4.48417000  | 0.31193200  | -1.11042700 | O | 0.37249500  | 1.69655600  | 1.78651600  |
| C                                                         | 4.99449800  | 1.51338900  | 1.39802800  | O | -1.14759400 | 0.20468600  | 2.59174200  |
| H                                                         | 4.10109700  | -0.40568300 | 1.84020900  | C | 0.64840100  | -2.57975000 | 0.47814300  |
| C                                                         | 5.63926200  | 1.71632800  | 2.77427000  | O | -0.29128800 | -2.34789600 | 1.28769000  |
| H                                                         | 5.63526500  | 1.95252700  | 0.62093200  | O | 0.97947700  | -1.85816400 | -0.52437100 |
| H                                                         | 4.05443500  | 2.07578500  | 1.36830500  | C | 1.46346800  | -3.83637400 | 0.68545700  |
| H                                                         | 6.63732800  | 1.27221200  | 2.83501400  | H | 1.08606400  | -4.60990800 | 0.00724000  |
| C                                                         | 3.49228900  | -1.51854400 | -0.58403300 | H | 2.50955700  | -3.64631400 | 0.43888700  |
| O                                                         | 3.30863400  | -2.38893900 | 0.24177900  | H | 1.35768400  | -4.19145300 | 1.71069300  |
| O                                                         | 3.33586400  | -1.67957900 | -1.90756300 | C | -0.45997400 | 1.98899800  | 3.98364500  |
| C                                                         | 6.00726800  | -0.77813800 | 0.91859400  | H | -0.64041600 | 3.04784300  | 3.77874100  |
| H                                                         | 6.64805900  | -0.37596100 | 0.12419500  | H | -1.23514400 | 1.59242000  | 4.63821400  |
| H                                                         | 5.79803700  | -1.82716300 | 0.69742100  | H | 0.51572900  | 1.91325400  | 4.47365500  |
| H                                                         | 6.57775800  | -0.75090700 | 1.85045200  | C | 0.18815200  | 2.48595900  | -1.47553400 |
| C                                                         | 2.83953400  | -2.96107300 | -2.33702300 | C | -0.19564600 | 3.77432600  | -1.82680000 |
| H                                                         | 2.90222600  | -2.94794600 | -3.42482900 | C | -1.47975400 | 3.96326300  | -2.33472000 |
| H                                                         | 1.80475700  | -3.07804200 | -2.01055400 | C | -2.31982400 | 2.85912700  | -2.47525900 |
| H                                                         | 3.45189900  | -3.76627400 | -1.92430800 | C | -1.85626200 | 1.59453000  | -2.11827300 |
| H                                                         | 5.74362300  | 2.78283100  | 2.99832900  | H | 0.51268900  | 4.58360700  | -1.69486500 |
| H                                                         | 5.02829700  | 1.26929900  | 3.56722900  | H | -1.82166900 | 4.95511300  | -2.61332100 |
| N                                                         | 2.66885800  | 0.72604200  | -0.25145300 | H | -3.32998400 | 2.96524800  | -2.85441600 |
| H                                                         | 2.01996700  | 0.58670200  | 0.52084200  | H | -2.46926700 | 0.71058300  | -2.20406300 |
| Ni                                                        | -0.20757500 | -0.07692300 | -0.45447900 | N | -0.61739300 | 1.41950100  | -1.63469500 |
|                                                           |             |             |             | C | 1.53775600  | 2.16651100  | -0.92666700 |
|                                                           |             |             |             | O | 2.47365200  | 2.93512000  | -1.05802000 |
| TS1-NI                                                    |             |             |             | C | 2.97130700  | 0.48776900  | 0.04409900  |
| Thermal correction to Gibbs Free Energy= 0.429869 Hartree |             |             |             | C | 3.31880400  | 0.44430400  | 1.55451900  |
| SCF Done: E(RM06) = -2053.83896525 Hartree                |             |             |             | H | 3.59006300  | 1.28628900  | -0.37854000 |
| O 1                                                       |             |             |             | C | 4.84705400  | 0.51630800  | 1.79185800  |
| Pd                                                        | -1.71104000 | -0.86997200 | 0.93227500  | H | 2.88924200  | 1.36954900  | 1.96001300  |
| O                                                         | -1.03756200 | -1.23387200 | -2.18178600 | C | 5.52567700  | 1.81573500  | 1.34000000  |
| C                                                         | -1.98741300 | -1.98109900 | -1.77470100 | H | 5.00743100  | 0.40002100  | 2.87119400  |
| O                                                         | -2.44120900 | -2.04068900 | -0.59897400 |   |             |             |             |

|                                                           |             |             |             |                                                           |             |             |             |
|-----------------------------------------------------------|-------------|-------------|-------------|-----------------------------------------------------------|-------------|-------------|-------------|
| H                                                         | 5.32647400  | -0.34662400 | 1.31846500  | C                                                         | -2.83806200 | -0.38870300 | 1.55808700  |
| H                                                         | 5.04710900  | 2.69328000  | 1.78966600  | H                                                         | -2.98758400 | -2.14846200 | 0.34657400  |
| C                                                         | 3.38205000  | -0.73930400 | -0.76939800 | C                                                         | -1.77496200 | -0.73483800 | 2.62082000  |
| O                                                         | 4.04958200  | -1.66946000 | -0.36886400 | H                                                         | -2.78982700 | 0.69123200  | 1.37369900  |
| O                                                         | 3.01178700  | -0.59270300 | -2.06077600 | C                                                         | -1.92576400 | 0.04062800  | 3.93466500  |
| C                                                         | 2.71504300  | -0.73240200 | 2.33341000  | H                                                         | -1.80810400 | -1.81481200 | 2.81606700  |
| H                                                         | 3.15680100  | -1.67853400 | 2.01290900  | H                                                         | -0.78252000 | -0.52662400 | 2.21355900  |
| H                                                         | 1.63110700  | -0.79929200 | 2.22323300  | H                                                         | -2.84558500 | -0.21309700 | 4.47146500  |
| H                                                         | 2.92387200  | -0.61162300 | 3.40197300  | C                                                         | -3.25941600 | -0.59503800 | -1.03711500 |
| C                                                         | 3.32739200  | -1.69852800 | -2.92409400 | O                                                         | -3.00480100 | -0.97213400 | -2.16065500 |
| H                                                         | 3.01615400  | -1.39015800 | -3.92186500 | O                                                         | -4.23614800 | 0.30704000  | -0.77942700 |
| H                                                         | 2.77219200  | -2.58360800 | -2.60575800 | C                                                         | -4.25303500 | -0.72639300 | 2.06401600  |
| H                                                         | 4.39859200  | -1.91033100 | -2.90100400 | H                                                         | -4.31043200 | -1.78196000 | 2.35737900  |
| H                                                         | 6.57880700  | 1.82171500  | 1.63975600  | H                                                         | -5.01171000 | -0.54106200 | 1.30151000  |
| H                                                         | 5.50251100  | 1.95207100  | 0.25371300  | H                                                         | -4.51204100 | -0.12487700 | 2.93999600  |
| N                                                         | 1.56402500  | 0.91673200  | -0.25911100 | C                                                         | -4.94680000 | 0.77346000  | -1.93834600 |
| H                                                         | 0.88216100  | 1.15750800  | 0.79865900  | H                                                         | -5.71179300 | 1.45263100  | -1.56089000 |
| Ni                                                        | 0.17624800  | -0.24888200 | -1.09100300 | H                                                         | -5.40480200 | -0.06273800 | -2.47193000 |
|                                                           |             |             |             | H                                                         | -4.26820900 | 1.29468300  | -2.61798900 |
|                                                           |             |             |             | H                                                         | -1.08516900 | -0.17403800 | 4.60224000  |
| 3-Ni                                                      |             |             |             | C                                                         | -1.12694900 | 2.26632700  | -0.09116300 |
| Thermal correction to Gibbs Free Energy= 0.376604 Hartree |             |             |             | O                                                         | -0.16780300 | 2.52972300  | 0.70220100  |
| SCF Done: E(RM06) = -1824.79872316 Hartree                |             |             |             | O                                                         | -1.21383800 | 1.28447500  | -0.88457400 |
| 0 1                                                       |             |             |             | C                                                         | -2.27670400 | 3.25148800  | -0.09533100 |
| C                                                         | 0.65151800  | -2.79942300 | -0.58690200 | H                                                         | -2.21445200 | 3.85596400  | -1.00647000 |
| C                                                         | 1.36041400  | -3.99349300 | -0.52577100 | H                                                         | -2.22569800 | 3.90881800  | 0.77241500  |
| C                                                         | 2.58204200  | -4.07866000 | -1.18948600 | H                                                         | -3.22104700 | 2.70435400  | -0.11610700 |
| C                                                         | 3.04843700  | -2.96815200 | -1.89604800 | C                                                         | 2.74093500  | 0.09384700  | 2.40213500  |
| C                                                         | 2.28301900  | -1.80552800 | -1.91421400 | O                                                         | 3.27713900  | 0.38064800  | 1.27500200  |
| H                                                         | 0.92232400  | -4.81379400 | 0.03116200  | C                                                         | 3.46203000  | -0.72467300 | 3.42730600  |
| H                                                         | 3.16189200  | -4.99640300 | -1.16330300 | H                                                         | 2.76269200  | -1.40798900 | 3.91426600  |
| H                                                         | 3.99148200  | -2.99397600 | -2.43072300 | H                                                         | 3.87081400  | -0.05758000 | 4.19368100  |
| H                                                         | 2.58889900  | -0.91714000 | -2.45063300 | H                                                         | 4.28142200  | -1.27552800 | 2.96321900  |
| N                                                         | 1.10929600  | -1.73037900 | -1.26638800 | O                                                         | 1.56917700  | 0.55483300  | 2.62572600  |
| C                                                         | -0.69749500 | -2.62146400 | 0.04498400  | H                                                         | -1.92972100 | 1.12252300  | 3.75523100  |
| O                                                         | -1.25561800 | -3.57381400 | 0.60218600  | Ni                                                        | -0.04084900 | -0.19596900 | -1.10925900 |
| N                                                         | -1.15842300 | -1.36266700 | -0.12328800 | Pd                                                        | 1.57916400  | 1.48700300  | 0.75395300  |
| C                                                         | 1.74581000  | 1.85291400  | -2.15126400 |                                                           |             |             |             |
| O                                                         | 2.08115500  | 2.34690000  | -1.02843800 |                                                           |             |             |             |
| O                                                         | 1.04434400  | 0.81771000  | -2.33842100 | TS2-Ni                                                    |             |             |             |
| C                                                         | 2.22958500  | 2.59807300  | -3.37772200 | Thermal correction to Gibbs Free Energy= 0.376651 Hartree |             |             |             |
| H                                                         | 2.45536300  | 1.89331100  | -4.18021600 | SCF Done: E(RM06) = -1824.77810882 Hartree                |             |             |             |
| H                                                         | 3.10014600  | 3.21024900  | -3.14130200 | 0 1                                                       |             |             |             |
| H                                                         | 1.42295300  | 3.25232100  | -3.72548400 | C                                                         | 1.09412700  | -2.57806700 | -0.63380200 |
| C                                                         | -2.56327400 | -1.14082900 | 0.21950500  | C                                                         | 1.98352100  | -3.64573900 | -0.62406700 |

|   |             |             |             |                                                           |             |             |             |
|---|-------------|-------------|-------------|-----------------------------------------------------------|-------------|-------------|-------------|
| C | 3.18793300  | -3.51510200 | -1.30932100 | H                                                         | -2.95211700 | 3.79735200  | -0.01111100 |
| C | 3.45671400  | -2.32359100 | -1.98716700 | H                                                         | -3.81612900 | 2.24907500  | -0.24547400 |
| C | 2.51664700  | -1.29810000 | -1.95391300 | C                                                         | 2.89353200  | -0.09396400 | 1.87575400  |
| H | 1.69582100  | -4.53895600 | -0.08201800 | O                                                         | 2.75957200  | 1.14270000  | 1.45464500  |
| H | 3.90724200  | -4.32844300 | -1.32187400 | C                                                         | 4.31264800  | -0.42958800 | 2.29996800  |
| H | 4.37940100  | -2.18377700 | -2.53963200 | H                                                         | 4.38059800  | -1.49053700 | 2.54347900  |
| H | 2.66300900  | -0.35760400 | -2.46852100 | H                                                         | 4.58530200  | 0.16549600  | 3.17713000  |
| N | 1.36130500  | -1.43088500 | -1.28236600 | H                                                         | 5.01866700  | -0.17712700 | 1.50401800  |
| C | -0.24386300 | -2.63220400 | 0.03588200  | O                                                         | 1.96741700  | -0.90137100 | 1.93492600  |
| O | -0.61403900 | -3.65854900 | 0.61456800  | H                                                         | 0.00689300  | 0.74118900  | 2.48074100  |
| N | -0.91991200 | -1.46691500 | -0.10555400 | Ni                                                        | -0.03503000 | -0.12313600 | -1.10005300 |
| C | 1.53474600  | 2.22930000  | -1.82173600 | Pd                                                        | 0.89423300  | 1.65126500  | 0.97254500  |
| O | 1.66965400  | 2.68855200  | -0.64345300 |                                                           |             |             |             |
| O | 0.95767300  | 1.15672400  | -2.16429000 |                                                           |             |             |             |
| C | 2.17459100  | 3.05411800  | -2.92257300 | 4-Ni                                                      |             |             |             |
| H | 3.17203500  | 2.65035500  | -3.12812100 | Thermal correction to Gibbs Free Energy= 0.378329 Hartree |             |             |             |
| H | 2.28204600  | 4.09344300  | -2.61167700 | SCF Done: E(RM06) = -1824.78350196 Hartree                |             |             |             |
| H | 1.58122400  | 2.98035200  | -3.83550700 | 0 1                                                       |             |             |             |
| C | -2.29522500 | -1.46335100 | 0.39333800  | C                                                         | 1.07572100  | -2.50751700 | -0.70163000 |
| C | -2.50921600 | -0.64456500 | 1.70170100  | C                                                         | 1.96525900  | -3.57392500 | -0.73993400 |
| H | -2.51183300 | -2.51257600 | 0.64381100  | C                                                         | 3.13370200  | -3.43900900 | -1.48348200 |
| C | -1.38174700 | -0.91517500 | 2.74390800  | C                                                         | 3.36879200  | -2.24377300 | -2.16727600 |
| H | -2.49066400 | 0.41987600  | 1.44783800  | C                                                         | 2.43106500  | -1.21920400 | -2.08308100 |
| C | -0.68575700 | 0.34150300  | 3.26364300  | H                                                         | 1.70739900  | -4.46939600 | -0.18695700 |
| H | -1.81707200 | -1.43127700 | 3.60921300  | H                                                         | 3.85228600  | -4.25144600 | -1.53482400 |
| H | -0.61960900 | -1.58607900 | 2.34756400  | H                                                         | 4.26399500  | -2.10023000 | -2.76240000 |
| H | -1.37581300 | 1.15061000  | 3.52053200  | H                                                         | 2.55322300  | -0.27400200 | -2.59598600 |
| C | -3.21704800 | -1.17385500 | -0.80268800 | N                                                         | 1.30861300  | -1.35825100 | -1.35946800 |
| O | -3.07545700 | -1.69750800 | -1.88517700 | C                                                         | -0.23294300 | -2.56878400 | 0.02295100  |
| O | -4.24214000 | -0.32634300 | -0.53821800 | O                                                         | -0.58219000 | -3.60012600 | 0.60696400  |
| C | -3.87435200 | -0.95234600 | 2.34719800  | N                                                         | -0.92255100 | -1.40711800 | -0.09107900 |
| H | -3.94168700 | -2.01556800 | 2.60826700  | C                                                         | 1.49162800  | 2.33160100  | -1.68602100 |
| H | -4.71108900 | -0.70579000 | 1.69343900  | O                                                         | 1.64065000  | 2.69991600  | -0.47589400 |
| H | -3.98752300 | -0.38110300 | 3.27540600  | O                                                         | 0.91638000  | 1.28505700  | -2.10411800 |
| C | -5.14279900 | -0.11572600 | -1.63921800 | C                                                         | 2.05356200  | 3.27712800  | -2.72978100 |
| H | -5.92507400 | 0.54199600  | -1.25888200 | H                                                         | 2.78723000  | 3.95144500  | -2.28843800 |
| H | -5.56818500 | -1.06426100 | -1.97480200 | H                                                         | 1.22880800  | 3.86860400  | -3.14111600 |
| H | -4.61898700 | 0.35041900  | -2.47720500 | H                                                         | 2.49487100  | 2.70763900  | -3.55030800 |
| H | -0.03398000 | 0.13057500  | 4.11532400  | C                                                         | -2.30815200 | -1.44588800 | 0.37520400  |
| C | -1.70330800 | 2.07349700  | -0.35059800 | C                                                         | -2.60174100 | -0.73029500 | 1.72873100  |
| O | -0.93111100 | 2.48020300  | 0.57524900  | H                                                         | -2.51407100 | -2.51182400 | 0.55572800  |
| O | -1.51927700 | 1.05712700  | -1.08039000 | C                                                         | -1.48177500 | -0.96608200 | 2.78016700  |
| C | -2.97233900 | 2.86348100  | -0.57218400 | H                                                         | -2.70175100 | 0.34742500  | 1.56016800  |
| H | -3.09723000 | 3.06113000  | -1.63971400 | C                                                         | -0.39685100 | 0.11852900  | 2.90702500  |
|   |             |             |             | H                                                         | -1.95927800 | -1.02187500 | 3.76676400  |

|                                                           |             |             |             |   |             |             |             |
|-----------------------------------------------------------|-------------|-------------|-------------|---|-------------|-------------|-------------|
| H                                                         | -1.01184600 | -1.93999500 | 2.61290700  | H | 2.67615700  | 0.07664200  | -2.57740500 |
| H                                                         | -0.83836400 | 1.11397200  | 2.99730100  | N | 1.51709500  | -1.15332700 | -1.39816500 |
| C                                                         | -3.21140200 | -1.09972800 | -0.81959500 | C | 0.06206900  | -2.54376500 | -0.08468400 |
| O                                                         | -3.03954500 | -1.55025200 | -1.93022200 | O | -0.18934900 | -3.61855900 | 0.47188800  |
| O                                                         | -4.25949700 | -0.29404100 | -0.51738100 | N | -0.72307600 | -1.44620000 | -0.18140000 |
| C                                                         | -3.93169000 | -1.24918500 | 2.31323700  | C | 1.32582800  | 2.51375700  | -1.59219500 |
| H                                                         | -3.83947700 | -2.30678900 | 2.58852500  | O | 1.36331700  | 2.81648400  | -0.36375400 |
| H                                                         | -4.75797700 | -1.14940700 | 1.60834100  | O | 0.88217500  | 1.43515400  | -2.10159800 |
| H                                                         | -4.19244200 | -0.69354900 | 3.22031800  | C | 1.84118600  | 3.56019300  | -2.56164900 |
| C                                                         | -5.14682500 | -0.02838700 | -1.61747200 | H | 2.57249900  | 4.20627800  | -2.07486400 |
| H                                                         | -5.94854500 | 0.58695500  | -1.20793400 | H | 0.99642900  | 4.17701400  | -2.88707300 |
| H                                                         | -5.54695600 | -0.96070800 | -2.02242100 | H | 2.26909900  | 3.08506900  | -3.44626300 |
| H                                                         | -4.61898800 | 0.50276000  | -2.41312100 | C | -2.08958100 | -1.59791500 | 0.31079300  |
| H                                                         | 0.24955400  | -0.05970200 | 3.77001600  | C | -2.42579000 | -0.86890600 | 1.64766600  |
| C                                                         | -1.73144700 | 2.08635800  | -0.20513800 | H | -2.19619700 | -2.67272800 | 0.52159200  |
| O                                                         | -0.94670500 | 2.41537800  | 0.74000500  | C | -1.25783900 | -0.91518000 | 2.67250100  |
| O                                                         | -1.55780800 | 1.13039700  | -1.01453300 | H | -2.66738600 | 0.17752700  | 1.44323600  |
| C                                                         | -2.99854900 | 2.89745600  | -0.35224100 | C | -0.37225900 | 0.34763400  | 2.80819100  |
| H                                                         | -2.97093900 | 3.78121900  | 0.28457500  | H | -1.70522000 | -1.05464600 | 3.66598700  |
| H                                                         | -3.84420600 | 2.26219200  | -0.07377300 | H | -0.64546800 | -1.80571200 | 2.50021000  |
| H                                                         | -3.12809300 | 3.18461200  | -1.39874100 | H | -1.00444200 | 1.23670600  | 2.81122700  |
| C                                                         | 3.07159000  | -0.19897300 | 1.74199400  | C | -3.03968500 | -1.36363500 | -0.87468000 |
| O                                                         | 2.76773200  | 1.05591400  | 1.49716100  | O | -2.83938600 | -1.80787800 | -1.98303900 |
| C                                                         | 4.53737600  | -0.36838000 | 2.11958800  | O | -4.16137800 | -0.66787000 | -0.56301600 |
| H                                                         | 5.18039200  | 0.05543400  | 1.34321700  | C | -3.66633300 | -1.52448300 | 2.28930700  |
| H                                                         | 4.75877600  | -1.42736200 | 2.25626700  | H | -3.43732500 | -2.54985900 | 2.60400500  |
| H                                                         | 4.74607500  | 0.17470900  | 3.04622000  | H | -4.51332000 | -1.55824900 | 1.60214300  |
| O                                                         | 2.28945100  | -1.14390100 | 1.69095200  | H | -3.97636500 | -0.96647100 | 3.17933900  |
| H                                                         | 0.28828800  | -0.00927600 | 2.02347100  | C | -5.09020700 | -0.51203200 | -1.64942800 |
| Ni                                                        | -0.07376000 | -0.05152600 | -1.10386200 | H | -5.94516100 | 0.02136600  | -1.23261300 |
| Pd                                                        | 0.88637400  | 1.54392400  | 1.04872200  | H | -5.39700600 | -1.48671800 | -2.03588200 |
|                                                           |             |             |             | H | -4.63519000 | 0.06055900  | -2.46116200 |
|                                                           |             |             |             | H | 0.15130800  | 0.35046000  | 3.77191600  |
|                                                           |             |             |             | C | -1.90517300 | 1.94923800  | -0.27121800 |
|                                                           |             |             |             | O | -1.23573500 | 2.30036900  | 0.75004100  |
|                                                           |             |             |             | O | -1.59091400 | 1.04341700  | -1.09727500 |
|                                                           |             |             |             | C | -3.22202300 | 2.65918300  | -0.49634000 |
|                                                           |             |             |             | H | -3.28641800 | 3.55920100  | 0.11484500  |
|                                                           |             |             |             | H | -4.02818000 | 1.97152900  | -0.22380500 |
|                                                           |             |             |             | H | -3.33314300 | 2.90410100  | -1.55504000 |
|                                                           |             |             |             | C | 2.78329900  | -0.15216100 | 1.94613100  |
|                                                           |             |             |             | O | 2.60215700  | 1.03448900  | 1.52140700  |
|                                                           |             |             |             | C | 4.20494700  | -0.63580900 | 2.10708400  |
|                                                           |             |             |             | H | 4.38542400  | -1.44122600 | 1.38870100  |
| TS3-Ni                                                    |             |             |             |   |             |             |             |
| Thermal correction to Gibbs Free Energy= 0.377580 Hartree |             |             |             |   |             |             |             |
| SCF Done: E(RM06) = -1824.76670116 Hartree                |             |             |             |   |             |             |             |
| O 1                                                       |             |             |             |   |             |             |             |
| C                                                         | 1.37235300  | -2.34311800 | -0.78544600 |   |             |             |             |
| C                                                         | 2.35541300  | -3.32497100 | -0.83972000 |   |             |             |             |
| C                                                         | 3.51994500  | -3.06285000 | -1.55760800 |   |             |             |             |
| C                                                         | 3.65907600  | -1.82922500 | -2.19915200 |   |             |             |             |
| C                                                         | 2.63342200  | -0.89332100 | -2.09858100 |   |             |             |             |
| H                                                         | 2.16545900  | -4.25962200 | -0.32480100 |   |             |             |             |
| H                                                         | 4.30641800  | -3.80870300 | -1.62503100 |   |             |             |             |
| H                                                         | 4.54622000  | -1.58921400 | -2.77492100 |   |             |             |             |



|                                                           |             |             |             |                                                           |             |             |             |
|-----------------------------------------------------------|-------------|-------------|-------------|-----------------------------------------------------------|-------------|-------------|-------------|
| H                                                         | 4.33394900  | -1.05478900 | 3.10806000  | H                                                         | -3.33687800 | -1.09153000 | 3.42109000  |
| H                                                         | 4.91418000  | 0.17384800  | 1.93855100  | H                                                         | -4.41844100 | -0.83702400 | 2.03889600  |
| O                                                         | 1.83354700  | -0.93905100 | 2.22796400  | H                                                         | -4.00055900 | 0.51570800  | 3.09815800  |
| H                                                         | 0.74728700  | -0.15448800 | 2.21533400  | C                                                         | -4.84721000 | -1.62664100 | -1.31207100 |
| Ni                                                        | 0.00347500  | 0.00984900  | -1.15115900 | H                                                         | -5.77373200 | -1.06045100 | -1.21157000 |
| Pd                                                        | 0.64355700  | 1.53858200  | 1.13296300  | H                                                         | -5.03903300 | -2.69794100 | -1.21645300 |
|                                                           |             |             |             | H                                                         | -4.38120400 | -1.43714800 | -2.28196500 |
|                                                           |             |             |             | H                                                         | -0.12372900 | 2.38824300  | 3.00648100  |
| 5-Ni                                                      |             |             |             | C                                                         | -1.92182200 | 1.57553200  | -1.25904300 |
| Thermal correction to Gibbs Free Energy= 0.380885 Hartree |             |             |             | O                                                         | -1.36912400 | 2.44748500  | -0.52869800 |
| SCF Done: E(RM06) = -1824.80147973 Hartree                |             |             |             | O                                                         | -1.53014300 | 0.38262400  | -1.44013100 |
| O 1                                                       |             |             |             | C                                                         | -3.20331200 | 1.97425000  | -1.96219100 |
| C                                                         | 1.43453100  | -2.61392800 | 0.05213700  | H                                                         | -3.39408900 | 3.04081900  | -1.84503000 |
| C                                                         | 2.34264700  | -3.64904100 | 0.24150700  | H                                                         | -4.02784000 | 1.40232500  | -1.52598900 |
| C                                                         | 3.48065500  | -3.69117300 | -0.56045500 | H                                                         | -3.13996200 | 1.71155700  | -3.02113800 |
| C                                                         | 3.66436000  | -2.70199400 | -1.52914400 | C                                                         | 2.59919100  | 0.89609300  | 2.17864500  |
| C                                                         | 2.70686400  | -1.70064300 | -1.66778200 | O                                                         | 2.14058700  | 1.93903200  | 1.70534500  |
| H                                                         | 2.11949800  | -4.38746800 | 1.00284300  | C                                                         | 3.87918100  | 0.86911700  | 2.96229000  |
| H                                                         | 4.21111400  | -4.48570700 | -0.44073500 | H                                                         | 4.59165400  | 0.19612600  | 2.47640600  |
| H                                                         | 4.53193000  | -2.70415800 | -2.18001600 | H                                                         | 3.68613400  | 0.47338800  | 3.96369400  |
| H                                                         | 2.77403200  | -0.92202800 | -2.41681400 | H                                                         | 4.29493100  | 1.87324100  | 3.02692400  |
| N                                                         | 1.61977900  | -1.65931200 | -0.88015700 | O                                                         | 2.02667500  | -0.28738400 | 2.05208300  |
| C                                                         | 0.16107800  | -2.49813400 | 0.84098300  | H                                                         | 1.18425900  | -0.22338300 | 1.53756000  |
| O                                                         | -0.13519600 | -3.36381500 | 1.66701500  | Ni                                                        | 0.12613400  | -0.44236100 | -1.02536700 |
| N                                                         | -0.52479700 | -1.36242700 | 0.52159800  | Pd                                                        | 0.36500400  | 2.06198700  | 0.53710700  |
| C                                                         | 1.49298500  | 1.61994700  | -2.37611200 |                                                           |             |             |             |
| O                                                         | 1.57986700  | 2.30381200  | -1.33125400 |                                                           |             |             |             |
| O                                                         | 0.94737300  | 0.46125300  | -2.48996900 | 6-Ni                                                      |             |             |             |
| C                                                         | 2.06419600  | 2.19935000  | -3.66038800 | Thermal correction to Gibbs Free Energy= 0.497014 Hartree |             |             |             |
| H                                                         | 2.93448000  | 2.81963800  | -3.43843300 | SCF Done: E(RM06) = -2134.95035001 Hartree                |             |             |             |
| H                                                         | 1.30329800  | 2.84122400  | -4.11798000 | O 1                                                       |             |             |             |
| H                                                         | 2.31870500  | 1.41341700  | -4.37364100 | C                                                         | -2.43402000 | 2.37551700  | -0.14784600 |
| C                                                         | -1.91203000 | -1.33272600 | 1.00241700  | C                                                         | -2.76391400 | 3.71133100  | -0.34717300 |
| C                                                         | -2.38233800 | -0.05193000 | 1.75474800  | C                                                         | -2.45491400 | 4.63065700  | 0.65306100  |
| H                                                         | -1.98306100 | -2.16231900 | 1.72120000  | C                                                         | -1.82864800 | 4.18103400  | 1.81689000  |
| C                                                         | -1.28471600 | 0.58084000  | 2.65613000  | C                                                         | -1.53318100 | 2.82651400  | 1.94853800  |
| H                                                         | -2.68942600 | 0.69652100  | 1.02148000  | H                                                         | -3.25720500 | 3.97806700  | -1.27487000 |
| C                                                         | -0.76579700 | 1.95632200  | 2.22923700  | H                                                         | -2.70086500 | 5.68148000  | 0.53222100  |
| H                                                         | -1.71501700 | 0.72172700  | 3.66028700  | H                                                         | -1.57279500 | 4.86343100  | 2.61996200  |
| H                                                         | -0.46363200 | -0.12683400 | 2.81162900  | H                                                         | -1.06858200 | 2.40945000  | 2.83273200  |
| H                                                         | -1.59529100 | 2.64285200  | 2.02943900  | N                                                         | -1.83058200 | 1.94880900  | 0.97737200  |
| C                                                         | -2.79632600 | -1.79180700 | -0.17540000 | C                                                         | -2.74383900 | 1.30604300  | -1.15462700 |
| O                                                         | -2.47254800 | -2.67135000 | -0.94279600 | O                                                         | -3.26994300 | 1.60832700  | -2.23356400 |
| O                                                         | -3.99468600 | -1.16755300 | -0.24930300 | N                                                         | -2.37733400 | 0.08155700  | -0.71060800 |
| C                                                         | -3.61170500 | -0.39122500 | 2.62259700  | C                                                         | 0.40029100  | -0.04719800 | 3.00190300  |

|    |             |             |             |                                          |                        |             |             |
|----|-------------|-------------|-------------|------------------------------------------|------------------------|-------------|-------------|
| O  | 1.29502400  | -0.23680200 | 2.14862600  | C                                        | 6.57418800             | -2.50483400 | -0.11586200 |
| O  | -0.85045600 | 0.13700800  | 2.77169200  | H                                        | 5.22402400             | -4.05943200 | 0.52499700  |
| C  | 0.79566800  | -0.04825100 | 4.47030500  | H                                        | 7.66393400             | -0.76261000 | -0.77564300 |
| H  | 0.10203900  | 0.54648100  | 5.06751800  | H                                        | 7.45634900             | -3.13593700 | -0.06205600 |
| H  | 1.81793400  | 0.31577300  | 4.58623200  | C                                        | 2.16576600             | 2.40141100  | -0.75221600 |
| H  | 0.75964200  | -1.07981600 | 4.83775600  | C                                        | 3.14063600             | 3.35223700  | -0.38393600 |
| C  | -2.73695900 | -1.03777200 | -1.57966400 | C                                        | 0.98234500             | 2.84373900  | -1.36816100 |
| C  | -1.55355900 | -1.78146400 | -2.27059700 | C                                        | 2.93361600             | 4.70519900  | -0.63574700 |
| H  | -3.35593400 | -0.59819600 | -2.37545300 | H                                        | 4.05125500             | 3.01637800  | 0.10205200  |
| C  | -0.37774700 | -0.84567200 | -2.66113000 | C                                        | 0.78709400             | 4.19943900  | -1.62430200 |
| H  | -1.17443900 | -2.52909700 | -1.57226300 | H                                        | 0.23017900             | 2.11759100  | -1.65358900 |
| H  | -0.23838200 | -0.89751300 | -3.75272200 | C                                        | 1.75865300             | 5.13397700  | -1.25977600 |
| H  | -0.62974800 | 0.20056000  | -2.46476700 | H                                        | 3.69215600             | 5.42680300  | -0.34629800 |
| C  | -3.66011200 | -2.01838700 | -0.84655500 | H                                        | -0.12703700            | 4.52343100  | -2.11217100 |
| O  | -3.59361500 | -3.23144000 | -0.90110000 | H                                        | 1.60317700             | 6.18982200  | -1.46127200 |
| O  | -4.62646000 | -1.36975400 | -0.16777200 | Ni                                       | -1.61627600            | 0.03292900  | 1.03424000  |
| C  | -2.06926700 | -2.53611400 | -3.50985700 |                                          |                        |             |             |
| H  | -2.45041600 | -1.83493900 | -4.26274700 | TS4-Ni                                   |                        |             |             |
| H  | -2.86674200 | -3.23397600 | -3.24713800 | Thermal correction to Gibbs Free Energy= | 0.502627 Hartree       |             |             |
| H  | -1.25818800 | -3.11029600 | -3.97146900 | SCF Done: E(RM06) =                      | -2134.92022901 Hartree |             |             |
| C  | -5.53778000 | -2.20955200 | 0.55584700  | 0 1                                      |                        |             |             |
| H  | -6.26896900 | -1.53493100 | 1.00131300  | C                                        | 0.18970000             | -0.06054600 | 2.59497200  |
| H  | -5.00589500 | -2.76295100 | 1.33398200  | C                                        | 1.11143300             | 0.05860000  | 3.62917800  |
| H  | -6.02810400 | -2.91949700 | -0.11508600 | C                                        | 1.78296200             | -1.08410300 | 4.05964400  |
| C  | -0.89339100 | -2.73824900 | 0.97914800  | C                                        | 1.50931400             | -2.30507800 | 3.44110800  |
| O  | 0.22866800  | -2.57049900 | 0.42888600  | C                                        | 0.57586700             | -2.34683000 | 2.40833800  |
| O  | -1.75505400 | -1.83048300 | 1.21520700  | H                                        | 1.26024300             | 1.03881700  | 4.06708400  |
| C  | -1.30301000 | -4.14516900 | 1.35878900  | H                                        | 2.50607600             | -1.02727000 | 4.86781000  |
| H  | -0.46397800 | -4.83326400 | 1.25546800  | H                                        | 2.00875800             | -3.21767000 | 3.74689300  |
| H  | -2.11898300 | -4.44616900 | 0.69442800  | H                                        | 0.31547700             | -3.26119600 | 1.89029600  |
| H  | -1.68272900 | -4.15757500 | 2.38365500  | N                                        | -0.06417500            | -1.24067700 | 1.99926400  |
| Pd | 1.12001400  | -0.67693400 | -0.07513900 | C                                        | -0.61956200            | 1.09825400  | 2.09021000  |
| C  | 0.98005400  | -1.19152200 | -2.05197700 | O                                        | -0.42572600            | 2.23567400  | 2.55483600  |
| H  | 1.16781600  | -2.27004500 | -2.03640400 | N                                        | -1.50348700            | 0.71989700  | 1.14751900  |
| H  | 1.79292400  | -0.68107800 | -2.57288100 | C                                        | -0.45390600            | -3.27682100 | -0.92347800 |
| C  | 3.15269200  | -0.00690300 | -0.33426000 | O                                        | 0.19569700             | -2.51736400 | -1.69218200 |
| C  | 2.43434300  | 1.00555500  | -0.52173400 | O                                        | -1.12288500            | -2.93129500 | 0.10669700  |
| C  | 4.29424300  | -0.87611600 | -0.25546700 | C                                        | -0.46538000            | -4.75648600 | -1.26314400 |
| C  | 4.18430700  | -2.21977300 | 0.14783000  | H                                        | -0.67751800            | -5.35855600 | -0.37828200 |
| C  | 5.56376400  | -0.35903800 | -0.58907700 | H                                        | 0.48416700             | -5.05079200 | -1.71351300 |
| C  | 5.32000700  | -3.02358900 | 0.21343100  | H                                        | -1.25721600            | -4.93644100 | -1.99838400 |
| H  | 3.20850300  | -2.61725600 | 0.40752100  | C                                        | -2.46325800            | 1.73473800  | 0.71403100  |
| C  | 6.69148500  | -1.17081300 | -0.51611800 | C                                        | -2.18572200            | 2.42181900  | -0.65706000 |
| H  | 5.65138100  | 0.67540600  | -0.90643300 | H                                        | -2.41814300            | 2.52711100  | 1.47622600  |

|    |             |             |             |                                                           |             |             |             |
|----|-------------|-------------|-------------|-----------------------------------------------------------|-------------|-------------|-------------|
| C  | -0.68464800 | 2.75537800  | -0.88678000 | C                                                         | 4.04421700  | 4.23655700  | -1.27264200 |
| H  | -2.52694000 | 1.75752700  | -1.45411900 | H                                                         | 3.49359600  | 2.57347100  | -2.52933700 |
| H  | -0.63850600 | 3.77543000  | -1.29395600 | C                                                         | 3.88661500  | 4.84440100  | -0.02392300 |
| H  | -0.16912800 | 2.82377500  | 0.07340400  | H                                                         | 2.92305900  | 4.73447900  | 1.90219300  |
| C  | -3.89082900 | 1.17541100  | 0.79065100  | H                                                         | 4.69304000  | 4.68408700  | -2.01984900 |
| O  | -4.77160900 | 1.35626900  | -0.02696900 | H                                                         | 4.40919000  | 5.77004200  | 0.19950500  |
| O  | -4.08925200 | 0.49770100  | 1.93876200  | Ni                                                        | -1.39168800 | -1.10513200 | 0.60877100  |
| C  | -3.00616400 | 3.72441100  | -0.74940800 |                                                           |             |             |             |
| H  | -2.66287300 | 4.45137700  | -0.00259800 |                                                           |             |             |             |
| H  | -4.06979200 | 3.53971900  | -0.59463300 | 6-Ni                                                      |             |             |             |
| H  | -2.88248800 | 4.18151100  | -1.73723100 | Thermal correction to Gibbs Free Energy= 0.503885 Hartree |             |             |             |
| C  | -5.39244500 | -0.08571900 | 2.08655200  | SCF Done: E(RM06) = -2134.96177579 Hartree                |             |             |             |
| H  | -5.39266700 | -0.55990800 | 3.06808700  | 0 1                                                       |             |             |             |
| H  | -5.56304900 | -0.82805100 | 1.30287800  | C                                                         | 0.04451800  | 0.07516900  | 2.68138700  |
| H  | -6.16997200 | 0.68025600  | 2.02926700  | C                                                         | 0.91759400  | 0.14184700  | 3.76158000  |
| C  | -2.84702300 | -0.79114400 | -1.80078000 | C                                                         | 1.44945600  | -1.04391200 | 4.26362200  |
| O  | -1.82814800 | -0.48731000 | -2.47324500 | C                                                         | 1.08824900  | -2.25313100 | 3.66751700  |
| O  | -2.87238800 | -1.02063100 | -0.54216900 | C                                                         | 0.21240000  | -2.24040000 | 2.58513700  |
| C  | -4.18958200 | -0.86960100 | -2.49703500 | H                                                         | 1.13795200  | 1.11894400  | 4.17564000  |
| H  | -4.07525400 | -0.72755100 | -3.57171100 | H                                                         | 2.13077300  | -1.02896900 | 5.10901700  |
| H  | -4.83763600 | -0.09434000 | -2.07730600 | H                                                         | 1.47544100  | -3.19925600 | 4.02899500  |
| H  | -4.65572500 | -1.83746500 | -2.29198100 | H                                                         | -0.11098300 | -3.14631400 | 2.08971600  |
| Pd | 0.19805800  | -0.36749000 | -1.62354500 | N                                                         | -0.29125100 | -1.09310600 | 2.10331500  |
| C  | 0.08590100  | 1.89898200  | -1.89029700 | C                                                         | -0.61883100 | 1.28978300  | 2.10576100  |
| H  | -0.56129000 | 1.47992800  | -2.66988100 | O                                                         | -0.34711800 | 2.41370900  | 2.55825000  |
| H  | 0.85816600  | 2.45548600  | -2.41303300 | N                                                         | -1.47839500 | 0.97655400  | 1.11302500  |
| C  | 2.05384900  | -0.09116200 | -0.93507800 | C                                                         | -0.68864400 | -3.29890500 | -0.62294700 |
| C  | 1.89556100  | 1.18235300  | -0.90124400 | O                                                         | 0.12967900  | -2.71539100 | -1.39454000 |
| C  | 3.08428300  | -1.05754000 | -0.55275000 | O                                                         | -1.45597500 | -2.75607600 | 0.23347400  |
| C  | 3.24088400  | -2.27450200 | -1.23772000 | C                                                         | -0.76419100 | -4.80876500 | -0.75006900 |
| C  | 3.96541900  | -0.75038100 | 0.50241200  | H                                                         | -1.17725600 | -5.25610700 | 0.15506400  |
| C  | 4.26374100  | -3.15351600 | -0.88245500 | H                                                         | 0.22282600  | -5.21870100 | -0.97144300 |
| H  | 2.55021100  | -2.52369500 | -2.03403800 | H                                                         | -1.42439700 | -5.05086800 | -1.58980100 |
| C  | 4.98049200  | -1.63661700 | 0.85509200  | C                                                         | -2.27595700 | 2.09133700  | 0.59192500  |
| H  | 3.84752700  | 0.18653400  | 1.03747000  | C                                                         | -1.77246200 | 2.72692400  | -0.73943800 |
| C  | 5.13507100  | -2.84060200 | 0.16281200  | H                                                         | -2.21117600 | 2.87939500  | 1.35666700  |
| H  | 4.37950000  | -4.08742900 | -1.42531000 | C                                                         | -0.22266600 | 2.89076700  | -0.75528100 |
| H  | 5.65464800  | -1.38501500 | 1.66917400  | H                                                         | -2.08007200 | 2.07023400  | -1.56224700 |
| H  | 5.92910900  | -3.52939000 | 0.43702500  | H                                                         | 0.01435100  | 3.90612200  | -1.08935800 |
| C  | 2.53557600  | 2.45343300  | -0.59924100 | H                                                         | 0.15561400  | 2.82297200  | 0.26373800  |
| C  | 2.37792900  | 3.07373900  | 0.65457900  | C                                                         | -3.75937000 | 1.70958900  | 0.52920800  |
| C  | 3.37060700  | 3.05292900  | -1.56276600 | O                                                         | -4.51772800 | 1.94672400  | -0.39029100 |
| C  | 3.05445000  | 4.26197900  | 0.93328600  | O                                                         | -4.15833300 | 1.13631200  | 1.68132700  |
| H  | 1.71802100  | 2.64053200  | 1.39961400  | C                                                         | -2.44274500 | 4.09661100  | -0.95752000 |
|    |             |             |             | H                                                         | -2.15113400 | 4.79876700  | -0.16676900 |

|    |             |             |             |   |             |             |             |
|----|-------------|-------------|-------------|---|-------------|-------------|-------------|
| H  | -3.52991800 | 4.01298100  | -0.96832600 | H | -0.20607700 | 1.19015500  | -2.09906300 |
| H  | -2.12450400 | 4.52585200  | -1.91372700 | H | 0.85985200  | 2.42469100  | -2.60323700 |
| C  | -5.52878100 | 0.71174500  | 1.71249900  | C | 1.79036400  | -0.11341600 | -1.03923800 |
| H  | -5.69619900 | 0.33064500  | 2.71996500  | C | 1.80105900  | 1.22860100  | -1.09834000 |
| H  | -5.69255900 | -0.07695000 | 0.97396000  | C | 2.80867800  | -1.05571800 | -0.56130500 |
| H  | -6.19996500 | 1.54774800  | 1.50062600  | C | 3.18550700  | -2.16222100 | -1.34596500 |
| C  | -3.03896600 | -0.79683300 | -1.77150300 | C | 3.43041500  | -0.88011700 | 0.69006200  |
| O  | -2.03212400 | -0.90375500 | -2.51560900 | C | 4.16697900  | -3.04698000 | -0.90504300 |
| O  | -3.01633900 | -0.67389400 | -0.49534500 | H | 2.69854500  | -2.32036600 | -2.30235000 |
| C  | -4.41996500 | -0.78402700 | -2.39124300 | C | 4.40999400  | -1.76969400 | 1.12916500  |
| H  | -4.35627000 | -0.88685100 | -3.47450400 | H | 3.14724300  | -0.03538100 | 1.30859100  |
| H  | -4.91004900 | 0.15649300  | -2.12307200 | C | 4.78399400  | -2.85498200 | 0.33385900  |
| H  | -5.01696200 | -1.59977200 | -1.97247400 | H | 4.45098500  | -3.88927200 | -1.52978200 |
| Pd | -0.00135700 | -0.65056500 | -1.70415300 | H | 4.88506200  | -1.61177000 | 2.09366200  |
| C  | 0.55453400  | 1.91384700  | -1.68072000 |   |             |             |             |
| H  | 5.54909700  | -3.54601400 | 0.67645700  |   |             |             |             |
| C  | 2.96570400  | 2.10330400  | -0.75466600 |   |             |             |             |
| C  | 3.00105700  | 2.84825400  | 0.43671000  |   |             |             |             |
| C  | 4.04355100  | 2.21155500  | -1.64778100 |   |             |             |             |
| C  | 4.08596200  | 3.68007200  | 0.71933300  |   |             |             |             |
| H  | 2.18508500  | 2.77070800  | 1.14951900  |   |             |             |             |
| C  | 5.12777700  | 3.04172000  | -1.36186000 |   |             |             |             |
| H  | 4.02749800  | 1.63562000  | -2.56882800 |   |             |             |             |
| C  | 5.15084100  | 3.78064900  | -0.17775600 |   |             |             |             |
| H  | 4.09806800  | 4.24831600  | 1.64527400  |   |             |             |             |
| H  | 5.95395600  | 3.11026600  | -2.06411300 |   |             |             |             |
| H  | 5.99390600  | 4.42834900  | 0.04552400  |   |             |             |             |
| Ni | -1.54934400 | -0.87667500 | 0.65295300  |   |             |             |             |

## 8. Cartesian coordinates of structures in Figure S1

[Pd(OAc)<sub>2</sub>]<sub>3</sub>

Thermal correction to Gibbs Free Energy= 0.241572 Hartree

SCF Done: E(RM06) = -1754.444965 Hartree

O 1

|    |             |             |             |
|----|-------------|-------------|-------------|
| Pd | -1.05859700 | -1.51250700 | 0.00121100  |
| C  | 1.15783100  | -2.36264100 | -1.87212500 |
| O  | 0.07520200  | -2.65066600 | -1.28123300 |
| O  | 1.92088000  | -1.37587700 | -1.64106200 |
| C  | 1.54409000  | 2.12450600  | 1.87720400  |
| O  | 0.52524100  | 2.59400700  | 1.28898000  |
| O  | 2.13034500  | 1.02450000  | 1.64119100  |
| C  | 2.15115200  | 2.98825600  | 2.96347000  |
| H  | 2.69252900  | 2.37019600  | 3.68059900  |
| H  | 2.86102800  | 3.68098600  | 2.49889500  |
| H  | 1.37556100  | 3.57173300  | 3.46106200  |
| C  | 1.61032700  | -3.31960500 | -2.95554300 |
| H  | 0.74812900  | -3.77550800 | -3.44360300 |
| H  | 2.23766300  | -2.80019600 | -3.68092900 |
| H  | 2.20536400  | -4.11280300 | -2.49034300 |
| Pd | -0.78244900 | 1.67371100  | -0.00202600 |
| C  | 1.47059900  | 2.18187500  | -1.87385300 |
| O  | 2.26202900  | 1.38713600  | -1.28539800 |
| O  | 0.23502300  | 2.34959400  | -1.64063600 |
| C  | 1.06621300  | -2.39930600 | 1.87871700  |
| O  | -0.17990500 | -2.34961300 | 1.64630800  |
| O  | 1.98380500  | -1.75757600 | 1.28660200  |
| C  | 1.50809800  | -3.35611900 | 2.96664900  |
| H  | 2.40530900  | -2.98056700 | 3.46016400  |
| H  | 0.70346100  | -3.50833200 | 3.68692200  |
| H  | 1.74500100  | -4.32034200 | 2.50433000  |
| C  | 2.07112500  | 3.05335400  | -2.95747400 |
| H  | 2.90409500  | 2.54045300  | -3.43956500 |
| H  | 1.30857600  | 3.32719000  | -3.68766400 |
| H  | 2.44917300  | 3.97087200  | -2.49392500 |
| Pd | 1.84257500  | -0.16064000 | 0.00016000  |
| C  | -2.62063500 | 0.27906300  | 1.87036200  |
| O  | -2.51769500 | -0.83801100 | 1.28223500  |
| O  | -1.95827300 | 1.33519600  | 1.63563100  |
| C  | -3.67493400 | 0.37483700  | 2.95383400  |
| H  | -3.78912300 | -0.58628300 | 3.45671000  |
| H  | -3.41535400 | 1.15789200  | 3.66710300  |

|   |             |             |             |
|---|-------------|-------------|-------------|
| H | -4.63012400 | 0.63581900  | 2.48576600  |
| C | -2.61954000 | 0.17535900  | -1.87971600 |
| O | -2.14909400 | -0.97863200 | -1.64186800 |
| O | -2.32692700 | 1.25943200  | -1.29384200 |
| C | -3.67246300 | 0.25785600  | -2.96551300 |
| H | -4.65738000 | 0.13366500  | -2.50274700 |
| H | -3.63972300 | 1.23285900  | -3.45298100 |
| H | -3.53078400 | -0.54412000 | -3.69101600 |

1

Thermal correction to Gibbs Free Energy= 0.251892 Hartree

SCF Done: E(RM06) = -841.1069043 Hartree

O 1

|   |             |             |             |
|---|-------------|-------------|-------------|
| C | 2.59887200  | -0.20253200 | -0.24316200 |
| C | 3.66984800  | -0.93916200 | -0.75255300 |
| C | 4.96026500  | -0.58115600 | -0.36830800 |
| C | 5.12727400  | 0.49285800  | 0.50517200  |
| C | 3.99107400  | 1.16689900  | 0.95928100  |
| H | 3.46819600  | -1.76195000 | -1.42783000 |
| H | 5.81952300  | -1.12922100 | -0.74268400 |
| H | 6.11344300  | 0.80640700  | 0.83122700  |
| H | 4.08480000  | 2.00936000  | 1.64102500  |
| N | 2.74813000  | 0.83322400  | 0.59809900  |
| C | 1.19255800  | -0.57577600 | -0.65031400 |
| O | 0.97031400  | -1.51187400 | -1.42242400 |
| N | 0.22838700  | 0.19582500  | -0.09824400 |
| H | 0.51112400  | 0.97047600  | 0.49191100  |
| C | -1.17734100 | 0.02091900  | -0.41011700 |
| C | -1.81972800 | -1.14275700 | 0.41756400  |
| H | -1.26726400 | -0.24039200 | -1.46948900 |
| C | -3.19614000 | -1.55976600 | -0.13522400 |
| C | -3.70233500 | -2.89633600 | 0.41975400  |
| H | -3.93279400 | -0.77404600 | 0.06909100  |
| H | -3.12814500 | -1.63468100 | -1.22805600 |
| H | -4.64899900 | -3.17763500 | -0.05262500 |
| H | -2.98382200 | -3.70146900 | 0.22890000  |
| H | -3.87616300 | -2.85402800 | 1.49953400  |
| C | -1.85712000 | 1.36464300  | -0.17375400 |
| O | -1.41471500 | 2.23695000  | 0.54786200  |
| O | -3.01592800 | 1.46433400  | -0.84411200 |
| C | -3.74966500 | 2.69083100  | -0.64551700 |
| H | -4.64846200 | 2.59367200  | -1.25239800 |
| H | -3.15437000 | 3.54562800  | -0.97285200 |
| H | -4.00752000 | 2.81552900  | 0.40820200  |

|                                                          |             |             |             |                                                           |             |             |             |
|----------------------------------------------------------|-------------|-------------|-------------|-----------------------------------------------------------|-------------|-------------|-------------|
| H                                                        | -1.13214600 | -1.98079300 | 0.24741900  | C                                                         | -1.58520100 | 2.68852100  | -0.35507700 |
| C                                                        | -1.84229500 | -0.83008200 | 1.91960100  | H                                                         | 1.44273000  | 5.01678200  | 0.02608100  |
| H                                                        | -2.12756100 | -1.71269300 | 2.49818200  | H                                                         | -0.88699100 | 5.97498400  | 0.14610500  |
| H                                                        | -2.55758600 | -0.03329400 | 2.15505000  | H                                                         | -2.83480500 | 4.40887500  | -0.09361300 |
| H                                                        | -0.85685400 | -0.51097600 | 2.27127000  | H                                                         | -2.39138900 | 1.96831300  | -0.44063000 |
|                                                          |             |             |             | N                                                         | -0.33497800 | 2.20212600  | -0.40922500 |
| TS1                                                      |             |             |             | C                                                         | 2.10559500  | 2.42719300  | -0.34601700 |
| Thermal correction to Gibbs Free Energy= 0.43127 Hartree |             |             |             | O                                                         | 3.01973500  | 3.06153300  | -0.84330200 |
| SCF Done: E(RM06) = -2010.722943 Hartree                 |             |             |             | C                                                         | 3.54840100  | 0.46363600  | -0.01028700 |
| O 1                                                      |             |             |             | C                                                         | 4.07475800  | -0.08256200 | 1.33943700  |
| Pd                                                       | -2.12877900 | -1.15915600 | 0.53161200  | H                                                         | 4.22508500  | 1.26211000  | -0.33722400 |
| O                                                        | -1.36455600 | 0.13512200  | -2.33041800 | C                                                         | 5.60226900  | -0.30955700 | 1.26739400  |
| C                                                        | -2.32274200 | -0.70478200 | -2.37335300 | H                                                         | 3.90981200  | 0.74009800  | 2.05167000  |
| O                                                        | -2.74600800 | -1.43369000 | -1.43121000 | C                                                         | 6.25763500  | -0.56472500 | 2.62941100  |
| C                                                        | -3.00804800 | -0.86043000 | -3.71834900 | H                                                         | 5.80679000  | -1.14675700 | 0.59267100  |
| H                                                        | -4.01065200 | -1.26897400 | -3.58975700 | H                                                         | 6.06752000  | 0.57744000  | 0.81643600  |
| H                                                        | -3.04560900 | 0.09866600  | -4.23785700 | H                                                         | 5.90892000  | -1.49619300 | 3.08532300  |
| H                                                        | -2.42021500 | -1.55283400 | -4.33029100 | C                                                         | 3.55086700  | -0.54410500 | -1.17141500 |
| Pd                                                       | 0.06361100  | 0.23981200  | -0.74026300 | O                                                         | 4.06625600  | -1.64251000 | -1.14936300 |
| C                                                        | -4.62512100 | 0.03941800  | 1.09827400  | O                                                         | 2.97716300  | -0.00813100 | -2.26025700 |
| O                                                        | -3.42548000 | 0.38275300  | 0.68132400  | C                                                         | 3.31598000  | -1.31699600 | 1.85536800  |
| O                                                        | -4.96823900 | -1.09876700 | 1.39915800  | H                                                         | 3.51400800  | -2.18468700 | 1.22236900  |
| C                                                        | -5.58075100 | 1.22546900  | 1.17069800  | H                                                         | 2.23727000  | -1.14407500 | 1.88572200  |
| H                                                        | -6.54142300 | 0.90303500  | 1.57383100  | H                                                         | 3.63336100  | -1.55674800 | 2.87405900  |
| H                                                        | -5.16024100 | 2.01289300  | 1.80320600  | C                                                         | 2.91553900  | -0.85702500 | -3.42472300 |
| H                                                        | -5.72874000 | 1.64759000  | 0.17145600  | H                                                         | 2.49758100  | -0.23526400 | -4.21518600 |
| C                                                        | -0.49272900 | -0.24530900 | 2.73160000  | H                                                         | 2.26467500  | -1.70854600 | -3.22044000 |
| O                                                        | 0.27414700  | 0.25866200  | 1.87043500  | H                                                         | 3.91434100  | -1.20661600 | -3.69356900 |
| O                                                        | -1.56765700 | -0.89136500 | 2.48642200  | H                                                         | 7.34453800  | -0.64045400 | 2.52380300  |
| C                                                        | 0.22961900  | -2.69026000 | -0.43879800 | H                                                         | 6.04873000  | 0.25058800  | 3.33216900  |
| O                                                        | -0.77029800 | -2.72659700 | 0.32493200  | N                                                         | 2.21904800  | 1.11069500  | 0.11589800  |
| O                                                        | 0.67543100  | -1.66340500 | -1.06519900 | H                                                         | 1.71303900  | 0.91050900  | 0.99284600  |
| C                                                        | 0.98596900  | -3.97696200 | -0.68248900 |                                                           |             |             |             |
| H                                                        | 0.56833100  | -4.46376300 | -1.57053300 | 2                                                         |             |             |             |
| H                                                        | 2.04081600  | -3.76707500 | -0.86583600 | Thermal correction to Gibbs Free Energy= 0.375068 Hartree |             |             |             |
| H                                                        | 0.86264800  | -4.64955500 | 0.16715300  | SCF Done: E(RM06) = -1781.694835 Hartree                  |             |             |             |
| C                                                        | -0.12827800 | -0.12277100 | 4.20166600  | O 1                                                       |             |             |             |
| H                                                        | 0.28292600  | 0.86908500  | 4.40261200  | C                                                         | 0.42635300  | 3.04102700  | 0.34518200  |
| H                                                        | -0.99133900 | -0.31363100 | 4.83986400  | C                                                         | 0.21001300  | 4.34731100  | 0.76895700  |
| H                                                        | 0.64830000  | -0.86025600 | 4.43152400  | C                                                         | -0.92562700 | 5.02053500  | 0.32269500  |
| C                                                        | 0.72606600  | 3.02348900  | -0.24935800 | C                                                         | -1.80937000 | 4.36777700  | -0.53888600 |
| C                                                        | 0.56220300  | 4.39211400  | -0.06421500 | C                                                         | -1.53332900 | 3.06011100  | -0.92842000 |
| C                                                        | -0.73041500 | 4.91222700  | -0.00667100 | H                                                         | 0.94208600  | 4.79365400  | 1.43165200  |
| C                                                        | -1.81406800 | 4.04770200  | -0.14525300 | H                                                         | -1.11974300 | 6.04062100  | 0.63863400  |

|    |             |             |             |                                          |              |             |             |
|----|-------------|-------------|-------------|------------------------------------------|--------------|-------------|-------------|
| H  | -2.70250300 | 4.85735000  | -0.91034800 | O                                        | -3.28132500  | -0.18112200 | 1.44167200  |
| H  | -2.17165400 | 2.49925000  | -1.60012300 | C                                        | -3.13852600  | 0.04299500  | 3.85330000  |
| N  | -0.43762700 | 2.42348700  | -0.48511400 | H                                        | -2.28081400  | 0.23209900  | 4.50191900  |
| C  | 1.63569600  | 2.25219100  | 0.76631400  | H                                        | -3.76726500  | -0.71503400 | 4.33272100  |
| O  | 2.49807000  | 2.78176500  | 1.48037100  | H                                        | -3.72743800  | 0.95129700  | 3.71667000  |
| N  | 1.63917300  | 0.98745600  | 0.28374000  | O                                        | -1.66517000  | -1.26031300 | 2.43897700  |
| Pd | 0.09268400  | 0.51381300  | -0.93865000 | H                                        | 1.08408300   | -2.31091500 | 3.55633300  |
| C  | -2.37524100 | -0.54228100 | -2.43088100 |                                          |              |             |             |
| O  | -2.70906900 | -1.37549700 | -1.52974100 | TS2-6                                    |              |             |             |
| O  | -1.45789800 | 0.32710400  | -2.36119200 | Thermal correction to Gibbs Free Energy= | 0.374968     | Hartree     |             |
| C  | -3.15169400 | -0.62493900 | -3.72938600 | SCF Done: E(RM06) =                      | -1781.661777 | Hartree     |             |
| H  | -4.13593400 | -1.06391800 | -3.56427000 | O 1                                      |              |             |             |
| H  | -2.59633800 | -1.26329700 | -4.42486800 | C                                        | -1.03580000  | 2.69805900  | -0.32086800 |
| H  | -3.24034700 | 0.36567200  | -4.17859600 | C                                        | -1.87926600  | 3.79723200  | -0.20419100 |
| C  | 2.82085400  | 0.17200400  | 0.56482200  | C                                        | -3.09145500  | 3.79141800  | -0.89160200 |
| C  | 2.64927100  | -0.90222500 | 1.67894900  | C                                        | -3.42454500  | 2.68530100  | -1.67735400 |
| H  | 3.57932300  | 0.88395800  | 0.92246500  | C                                        | -2.53588100  | 1.61596000  | -1.75104200 |
| C  | 1.77755900  | -0.37279800 | 2.83591200  | H                                        | -1.55612700  | 4.62109400  | 0.42118600  |
| H  | 2.14311500  | -1.77260400 | 1.24174100  | H                                        | -3.76808500  | 4.63715800  | -0.81986400 |
| C  | 1.53060800  | -1.39252000 | 3.95359400  | H                                        | -4.35624400  | 2.64435100  | -2.23040100 |
| H  | 2.24597400  | 0.52973600  | 3.25051400  | H                                        | -2.72749000  | 0.72723600  | -2.34110700 |
| H  | 0.80782000  | -0.06577300 | 2.43446800  | N                                        | -1.37289300  | 1.63732000  | -1.08075700 |
| H  | 2.44907700  | -1.66453600 | 4.48311900  | C                                        | 0.29519100   | 2.63195300  | 0.37749100  |
| C  | 3.40166000  | -0.41093900 | -0.73074100 | O                                        | 0.66615700   | 3.57469800  | 1.08999700  |
| O  | 3.86270100  | -1.52797600 | -0.86353600 | N                                        | 0.96582200   | 1.48231800  | 0.12947800  |
| O  | 3.41246700  | 0.50447800  | -1.71887800 | Pd                                       | 0.03007200   | 0.16403700  | -1.09112300 |
| C  | 4.03380200  | -1.34995300 | 2.18271000  | C                                        | -1.56114300  | -2.24887300 | -1.91271400 |
| H  | 4.53796400  | -0.52484300 | 2.70185600  | O                                        | -1.48688100  | -2.75206900 | -0.75282400 |
| H  | 4.66839700  | -1.68298100 | 1.36054800  | O                                        | -1.13330800  | -1.11015400 | -2.29252400 |
| H  | 3.94410700  | -2.17975100 | 2.88916300  | C                                        | -2.20688900  | -3.10960200 | -2.98269300 |
| C  | 3.94771500  | 0.05273600  | -2.97482800 | H                                        | -2.72122600  | -2.48452900 | -3.71482100 |
| H  | 3.88678800  | 0.90976500  | -3.64491600 | H                                        | -2.89582000  | -3.82675800 | -2.53541200 |
| H  | 3.35357200  | -0.77860500 | -3.36096800 | H                                        | -1.41901400  | -3.66246000 | -3.50557700 |
| H  | 4.98510600  | -0.27005800 | -2.85846100 | C                                        | 2.28865900   | 1.33924300  | 0.72964200  |
| H  | 0.83458700  | -0.98611000 | 4.69490200  | C                                        | 2.40198700   | 0.36800500  | 1.94572200  |
| C  | 0.44991300  | -2.50269700 | -0.97722000 | H                                        | 2.54500200   | 2.34410000  | 1.09561900  |
| O  | -0.54565700 | -2.75135500 | -0.22498500 | C                                        | 1.16687900   | 0.38234200  | 2.88693200  |
| O  | 0.81431300  | -1.37112600 | -1.41700800 | H                                        | 2.53333300   | -0.64571900 | 1.56044800  |
| C  | 1.28960300  | -3.68802300 | -1.40103600 | C                                        | 0.22993200   | -0.85010100 | 2.82150900  |
| H  | 1.14257200  | -3.85782900 | -2.47255200 | H                                        | 1.54038800   | 0.40688200  | 3.91916900  |
| H  | 1.00263600  | -4.58375200 | -0.85083600 | H                                        | 0.59991000   | 1.30959400  | 2.76263900  |
| H  | 2.34301700  | -3.44774200 | -1.23980100 | H                                        | 0.82786000   | -1.75867400 | 2.73683800  |
| Pd | -1.95005800 | -1.39413900 | 0.37007900  | C                                        | 3.33938200   | 1.02113200  | -0.34341200 |
| C  | -2.67380400 | -0.47779400 | 2.53021600  | O                                        | 4.24613000   | 0.21851000  | -0.22915100 |

|                                                           |             |             |             |    |             |             |             |
|-----------------------------------------------------------|-------------|-------------|-------------|----|-------------|-------------|-------------|
| O                                                         | 3.18078600  | 1.79466800  | -1.43242600 | Pd | -1.57404600 | 0.05099000  | 0.97135000  |
| C                                                         | 3.66653400  | 0.72250400  | 2.75367400  | C  | 0.54261400  | 0.19255900  | 3.04684000  |
| H                                                         | 3.56360300  | 1.71029900  | 3.21940800  | O  | 1.40770100  | -0.11986400 | 2.19965500  |
| H                                                         | 4.55772800  | 0.72576900  | 2.12362000  | O  | -0.71291000 | 0.37973300  | 2.83436200  |
| H                                                         | 3.82282100  | -0.00770700 | 3.55483800  | C  | 0.97617300  | 0.35454800  | 4.49600700  |
| C                                                         | 4.13695100  | 1.58479400  | -2.48656200 | H  | 2.01848700  | 0.67370500  | 4.54547800  |
| H                                                         | 3.86965800  | 2.29333000  | -3.26984400 | H  | 0.89222300  | -0.61730500 | 4.99475500  |
| H                                                         | 4.07257300  | 0.55988500  | -2.85895900 | H  | 0.33219900  | 1.06065400  | 5.02329400  |
| H                                                         | 5.15191900  | 1.77363000  | -2.12855100 | C  | -2.66981000 | -1.23077800 | -1.66592900 |
| H                                                         | -0.34614700 | -0.95454100 | 3.74859400  | C  | -1.36582200 | -1.87607500 | -2.22845800 |
| C                                                         | 1.83525000  | -2.16510300 | -0.46340400 | H  | -3.28863000 | -0.90728100 | -2.51507100 |
| O                                                         | 1.12693600  | -2.53572800 | 0.52459100  | C  | -0.26127100 | -0.84757300 | -2.58820500 |
| O                                                         | 1.60291200  | -1.18296400 | -1.23139000 | H  | -0.97062400 | -2.53365800 | -1.45350400 |
| C                                                         | 3.09991100  | -2.94715800 | -0.73886800 | H  | -0.14347300 | -0.81958500 | -3.68304500 |
| H                                                         | 3.17673100  | -3.81156100 | -0.07989800 | H  | -0.56572300 | 0.16674100  | -2.31477100 |
| H                                                         | 3.95012700  | -2.27590300 | -0.58690900 | C  | -3.51612000 | -2.26826200 | -0.91288900 |
| H                                                         | 3.10870000  | -3.26810900 | -1.78388600 | O  | -3.31585200 | -3.46793500 | -0.90071700 |
| Pd                                                        | -0.74435300 | -1.75908900 | 0.95417500  | O  | -4.56414800 | -1.69513800 | -0.29457300 |
| C                                                         | -2.84884800 | -0.09627400 | 1.90968900  | C  | -1.69582400 | -2.75395400 | -3.44897400 |
| O                                                         | -2.69818800 | -1.24098100 | 1.37184500  | H  | -2.09768800 | -2.14628000 | -4.26929900 |
| C                                                         | -4.25375000 | 0.43013200  | 2.07463900  | H  | -2.42466600 | -3.52749300 | -3.19913300 |
| H                                                         | -4.40412500 | 1.25207900  | 1.36746000  | H  | -0.79044400 | -3.24969600 | -3.81649300 |
| H                                                         | -4.37808700 | 0.83365200  | 3.08190200  | C  | -5.42006000 | -2.59262500 | 0.43353500  |
| H                                                         | -4.98823100 | -0.35116100 | 1.88199000  | H  | -6.21303000 | -1.97058400 | 0.84753700  |
| O                                                         | -1.87471800 | 0.61607400  | 2.29450800  | H  | -4.86112800 | -3.08271200 | 1.23412100  |
| H                                                         | -0.83052700 | -0.21923400 | 2.23956300  | H  | -5.83659800 | -3.35329000 | -0.23131000 |
|                                                           |             |             |             | C  | -0.63899100 | -2.81306800 | 1.08604200  |
| 3-6                                                       |             |             |             | O  | 0.44692100  | -2.57155100 | 0.49679300  |
| Thermal correction to Gibbs Free Energy= 0.496511 Hartree |             |             |             | O  | -1.56628600 | -1.97406800 | 1.33758100  |
| SCF Done: E(RM06) = -2091.83529 Hartree                   |             |             |             | C  | -0.93088700 | -4.23970700 | 1.50644400  |
| 0 1                                                       |             |             |             | H  | -0.04808900 | -4.86760300 | 1.38598200  |
| C                                                         | -2.67650100 | 2.29680100  | -0.41404700 | H  | -1.74386500 | -4.61554400 | 0.87762600  |
| C                                                         | -3.12365300 | 3.58224600  | -0.70010100 | H  | -1.27264700 | -4.26083900 | 2.54428300  |
| C                                                         | -2.83490000 | 4.61059000  | 0.19603400  | Pd | 1.25302300  | -0.62226500 | -0.03093600 |
| C                                                         | -2.10468000 | 4.32285100  | 1.35057200  | C  | 1.11979000  | -1.15048400 | -2.00865100 |
| C                                                         | -1.68541000 | 3.01457700  | 1.57751900  | H  | 1.34921700  | -2.22075300 | -1.99635900 |
| H                                                         | -3.68958000 | 3.73172800  | -1.61222800 | H  | 1.90524700  | -0.60863600 | -2.53844900 |
| H                                                         | -3.17691500 | 5.62213000  | 0.00056600  | C  | 3.27520500  | 0.04360700  | -0.33879900 |
| H                                                         | -1.86068800 | 5.09416700  | 2.07233400  | C  | 2.54399600  | 1.05566300  | -0.49239700 |
| H                                                         | -1.12861800 | 2.71553100  | 2.45760300  | C  | 4.43464300  | -0.80544300 | -0.32084500 |
| N                                                         | -1.96902600 | 2.03589600  | 0.70432400  | C  | 4.36544500  | -2.15754400 | 0.06385300  |
| C                                                         | -2.95526900 | 1.13161800  | -1.32777800 | C  | 5.68013100  | -0.26084600 | -0.70046400 |
| O                                                         | -3.55621000 | 1.31995400  | -2.39497300 | C  | 5.51620900  | -2.94284500 | 0.06719800  |
| N                                                         | -2.47201400 | -0.03838400 | -0.85057800 | H  | 3.40871200  | -2.57745900 | 0.35667100  |



|                                                           |             |             |             |    |             |             |             |
|-----------------------------------------------------------|-------------|-------------|-------------|----|-------------|-------------|-------------|
| C                                                         | 6.82346500  | -1.05414600 | -0.68976900 | C  | -2.17770400 | 2.09764600  | -1.13066600 |
| H                                                         | 5.73751000  | 0.77964000  | -1.00435900 | H  | -2.86869800 | 2.64588700  | 0.85189300  |
| C                                                         | 6.74621800  | -2.39663900 | -0.30715100 | C  | -0.66265700 | 2.45216500  | -1.14086100 |
| H                                                         | 5.45121900  | -3.98513600 | 0.36469400  | H  | -2.33262100 | 1.23305400  | -1.77727700 |
| H                                                         | 7.77658700  | -0.62480200 | -0.98422300 | H  | -0.55351600 | 3.51607100  | -1.38728400 |
| H                                                         | 7.64031800  | -3.01287800 | -0.30221900 | H  | -0.24644100 | 2.35381600  | -0.13686500 |
| C                                                         | 2.26709600  | 2.45195000  | -0.70992000 | C  | -4.08961300 | 1.04388900  | 0.20465100  |
| C                                                         | 3.28279200  | 3.39843000  | -0.45717800 | O  | -4.78067500 | 0.95958300  | -0.79250600 |
| C                                                         | 1.02712900  | 2.89935200  | -1.19869400 | O  | -4.48638000 | 0.59373500  | 1.40881100  |
| C                                                         | 3.05795700  | 4.75130300  | -0.69501600 | C  | -2.99242300 | 3.26792800  | -1.71238400 |
| H                                                         | 4.23920200  | 3.06094300  | -0.07056400 | H  | -2.87031000 | 4.16924400  | -1.09881500 |
| C                                                         | 0.81302100  | 4.25481200  | -1.44152100 | H  | -4.05485400 | 3.02673600  | -1.77017000 |
| H                                                         | 0.24389300  | 2.17594000  | -1.39328400 | H  | -2.64323000 | 3.50673700  | -2.72308800 |
| C                                                         | 1.82444900  | 5.18481400  | -1.19031400 | C  | -5.77163300 | -0.05072300 | 1.43507600  |
| H                                                         | 3.84789600  | 5.46927900  | -0.49479600 | H  | -5.93475100 | -0.33738900 | 2.47352600  |
| H                                                         | -0.14683800 | 4.58315800  | -1.82818400 | H  | -5.76584300 | -0.93290600 | 0.79080000  |
| H                                                         | 1.65435500  | 6.24053900  | -1.37960200 | H  | -6.55403700 | 0.63419800  | 1.09881600  |
|                                                           |             |             |             | C  | -2.54949700 | -1.32673600 | -1.94534500 |
| TS3-δ                                                     |             |             |             | O  | -1.52587700 | -0.93400800 | -2.56217700 |
| Thermal correction to Gibbs Free Energy= 0.497773 Hartree |             |             |             | O  | -2.68191900 | -1.42166500 | -0.67637800 |
| SCF Done: E(RM06) = -2091.801292 Hartree                  |             |             |             | C  | -3.78670400 | -1.69146400 | -2.74254000 |
| O 1                                                       |             |             |             | H  | -3.56787200 | -1.70753600 | -3.81037500 |
| C                                                         | -0.26361900 | 0.60685300  | 2.88928200  | H  | -4.55868500 | -0.94575100 | -2.52959100 |
| C                                                         | 0.41742300  | 1.01999300  | 4.02951700  | H  | -4.16523300 | -2.66491900 | -2.42005100 |
| C                                                         | 1.30052800  | 0.13410400  | 4.64508800  | Pd | 0.45324100  | -0.55174800 | -1.66713900 |
| C                                                         | 1.47702100  | -1.13918700 | 4.10051200  | C  | 0.18144900  | 1.66181500  | -2.14594900 |
| C                                                         | 0.76558800  | -1.49000600 | 2.95582700  | H  | -0.41445600 | 1.14316200  | -2.90567400 |
| H                                                         | 0.22858900  | 2.02126700  | 4.39871100  | H  | 0.89517400  | 2.26729500  | -2.69492900 |
| H                                                         | 1.84247600  | 0.42948000  | 5.53806000  | C  | 2.27944200  | -0.08649500 | -1.00408000 |
| H                                                         | 2.15323800  | -1.85783900 | 4.54962100  | C  | 2.04772800  | 1.16953000  | -1.12321700 |
| H                                                         | 0.84757100  | -2.46211500 | 2.48409500  | C  | 3.35050800  | -0.95826400 | -0.52056900 |
| N                                                         | -0.07922000 | -0.62533000 | 2.37327700  | C  | 3.62497100  | -2.19146800 | -1.13688500 |
| C                                                         | -1.22723000 | 1.50866300  | 2.16282200  | C  | 4.14685300  | -0.54648000 | 0.56548400  |
| O                                                         | -1.39886500 | 2.67055200  | 2.56129600  | C  | 4.67930300  | -2.98426600 | -0.68418200 |
| N                                                         | -1.79858900 | 0.91462000  | 1.09135700  | H  | 3.00104200  | -2.52193800 | -1.95825500 |
| Pd                                                        | -1.24696200 | -1.01065300 | 0.74464200  | C  | 5.19438400  | -1.34739400 | 1.01665400  |
| C                                                         | 0.16075200  | -3.37505900 | -0.43843400 | H  | 3.94165300  | 0.40462200  | 1.04636800  |
| O                                                         | 0.59910000  | -2.68682900 | -1.39984900 | C  | 5.46537500  | -2.56815400 | 0.39304200  |
| O                                                         | -0.52562900 | -2.96698900 | 0.55781300  | H  | 4.88674000  | -3.93077200 | -1.17520100 |
| C                                                         | 0.50752200  | -4.85447700 | -0.45025300 | H  | 5.80163600  | -1.01583800 | 1.85419200  |
| H                                                         | 1.58816300  | -4.96474100 | -0.31350400 | H  | 6.28316800  | -3.19041700 | 0.74481100  |
| H                                                         | 0.25501100  | -5.28071800 | -1.42444500 | C  | 2.54436800  | 2.51007200  | -0.86458600 |
| H                                                         | -0.01770500 | -5.39106100 | 0.33996900  | C  | 2.46739500  | 3.04799100  | 0.43387000  |
| C                                                         | -2.71168800 | 1.71674200  | 0.28532000  | C  | 3.14648000  | 3.26987500  | -1.88573600 |

|                                                           |             |             |             |    |             |             |             |
|-----------------------------------------------------------|-------------|-------------|-------------|----|-------------|-------------|-------------|
| C                                                         | 2.98914600  | 4.31321500  | 0.70311700  | C  | -1.83087300 | 4.06830900  | -0.67371900 |
| H                                                         | 1.99657800  | 2.47146100  | 1.22340000  | H  | -1.73909100 | 4.68459600  | 0.22896800  |
| C                                                         | 3.66782200  | 4.53112600  | -1.60870700 | H  | -2.84229600 | 4.17442900  | -1.06760600 |
| H                                                         | 3.21574500  | 2.85704500  | -2.88771300 | H  | -1.13404900 | 4.46849000  | -1.41878700 |
| C                                                         | 3.58818200  | 5.05665200  | -0.31539700 | C  | -6.04493100 | 0.93583700  | 0.48592600  |
| H                                                         | 2.92154400  | 4.71906700  | 1.70790900  | H  | -6.55644900 | 0.42941400  | 1.30385800  |
| H                                                         | 4.13933800  | 5.10420600  | -2.40137500 | H  | -6.03857300 | 0.30728400  | -0.40761900 |
| H                                                         | 3.99154400  | 6.04245400  | -0.10400300 | H  | -6.53543100 | 1.88447100  | 0.25472400  |
|                                                           |             |             |             | C  | -2.55267800 | -0.39171500 | -2.46226800 |
| 4-6                                                       |             |             |             | O  | -1.38838100 | -0.32918400 | -2.92974400 |
| Thermal correction to Gibbs Free Energy= 0.500947 Hartree |             |             |             | O  | -2.86844400 | -0.55253900 | -1.23165100 |
| SCF Done: E(RM06) = -2091.84787 Hartree                   |             |             |             | C  | -3.73262900 | -0.23730900 | -3.40192500 |
| 0 1                                                       |             |             |             | H  | -3.39541600 | -0.15289400 | -4.43508300 |
| C                                                         | -0.97009500 | -0.42500900 | 3.08389900  | H  | -4.28689000 | 0.66041600  | -3.11223400 |
| C                                                         | -0.53971900 | -0.58051200 | 4.39681000  | H  | -4.40623400 | -1.09214300 | -3.29558400 |
| C                                                         | 0.10496500  | -1.76166000 | 4.75927000  | Pd | 0.47259900  | -0.23618900 | -1.74820800 |
| C                                                         | 0.30132000  | -2.75190100 | 3.79510000  | C  | 0.96386600  | 2.24363400  | -1.09489800 |
| C                                                         | -0.15229400 | -2.53237500 | 2.49715400  | H  | 0.41358300  | 1.71477300  | -1.92812000 |
| H                                                         | -0.72406800 | 0.23117800  | 5.09077400  | H  | 1.20528800  | 3.18292200  | -1.60659800 |
| H                                                         | 0.44886100  | -1.91048700 | 5.77966600  | C  | 2.19985900  | 0.15976300  | -0.85100300 |
| H                                                         | 0.79697000  | -3.68563500 | 4.03577700  | C  | 2.26132500  | 1.50191600  | -0.71894400 |
| H                                                         | -0.04322000 | -3.26486100 | 1.70706100  | C  | 3.11305600  | -0.90716900 | -0.43525400 |
| N                                                         | -0.76839200 | -1.38832600 | 2.16071600  | C  | 3.70115800  | -1.78195700 | -1.36888600 |
| C                                                         | -1.64415800 | 0.83547400  | 2.61076300  | C  | 3.39495400  | -1.09498000 | 0.93290700  |
| O                                                         | -1.76351100 | 1.79758300  | 3.38133200  | C  | 4.56400300  | -2.79266400 | -0.94864300 |
| N                                                         | -2.02199500 | 0.77408100  | 1.31286900  | H  | 3.47856800  | -1.65804200 | -2.42379600 |
| Pd                                                        | -1.61914900 | -0.96444900 | 0.34789500  | C  | 4.25482600  | -2.11013100 | 1.34886300  |
| C                                                         | -0.16918500 | -3.12562100 | -1.25030600 | H  | 2.94257800  | -0.42806300 | 1.66046500  |
| O                                                         | 0.65840700  | -2.32578500 | -1.78075100 | C  | 4.84421100  | -2.96157100 | 0.41032000  |
| O                                                         | -1.11690900 | -2.84898800 | -0.45023100 | H  | 5.01806300  | -3.45143200 | -1.68348100 |
| C                                                         | -0.00808000 | -4.58749300 | -1.63011400 | H  | 4.46816000  | -2.23446500 | 2.40696100  |
| H                                                         | 1.05110900  | -4.83991900 | -1.70810400 | H  | 5.51571400  | -3.75115000 | 0.73512800  |
| H                                                         | -0.46364800 | -4.74296000 | -2.61374600 | C  | 3.43075700  | 2.29938800  | -0.26791200 |
| H                                                         | -0.50685400 | -5.23432100 | -0.90757300 | C  | 3.25727800  | 3.58441900  | 0.28158800  |
| C                                                         | -2.49393400 | 2.00436500  | 0.68859400  | C  | 4.75043100  | 1.82723200  | -0.41717800 |
| C                                                         | -1.50232100 | 2.59826900  | -0.36248300 | C  | 4.34932100  | 4.35205000  | 0.68741100  |
| H                                                         | -2.61029800 | 2.72859600  | 1.50731900  | H  | 2.26044900  | 3.99224700  | 0.40530000  |
| C                                                         | -0.02666200 | 2.44664800  | 0.07783200  | C  | 5.83975000  | 2.59508300  | -0.01335000 |
| H                                                         | -1.64728500 | 2.01957800  | -1.28142400 | H  | 4.92324200  | 0.85756300  | -0.86838800 |
| H                                                         | 0.26990800  | 3.31919900  | 0.67143600  | C  | 5.64727500  | 3.86109600  | 0.54613400  |
| H                                                         | 0.07559800  | 1.57969400  | 0.72999500  | H  | 4.18095600  | 5.33640700  | 1.11514000  |
| C                                                         | -3.89801800 | 1.81808200  | 0.09667500  | H  | 6.84539900  | 2.20607900  | -0.14674000 |
| O                                                         | -4.27790300 | 2.25224600  | -0.97404700 | H  | 6.49826600  | 4.45880200  | 0.85939400  |
| O                                                         | -4.70145000 | 1.15695400  | 0.94756100  |    |             |             |             |
